# Supplementary material for: Computational insight into the mechanism of the Pd(0)–Brønsted acid cooperatively catalysed head-to-tail dimerization of terminal alkynes
Source: Royal Society of Chemistry journal article supplement (doi:10.1039/c5ra14086b), 2015-01-01
Supplement: c5ra14086b1.pdf [file c5ra14086b1.pdf]

## Supporting Information

# Computational Insight into the Mechanism of the Pd(0)- Brønsted Acid Cooperatively Catalysed Head-to-Tail Dimerization of Terminal Alkynes

*Hao Zhang and Xiaoguang Bao\**

College of Chemistry, Chemical Engineering and Materials Science,

Soochow University, 199 Ren-Ai Road, Suzhou Industrial Park,

Suzhou, Jiangsu 215123, China.

E-mail: [xgbao@suda.edu.cn](mailto:xgbao@suda.edu.cn)

## Contents

|                                                                                              |      |
|----------------------------------------------------------------------------------------------|------|
| 1. Energy profiles for the OA of the Ph <sub>2</sub> P(O)OH acid into the Pd(0) complex..... | 2    |
| 2. Computational studies for the head-to-tail dimerization of ethylacetylene.....            | 3-5  |
| 3. Cartesian coordinates and energies.....                                                   | 6-68 |

# 1. Energy profiles for the OA of the $\text{Ph}_2\text{P}(\text{O})\text{OH}$ acid into the $\text{Pd}(0)$ complex.

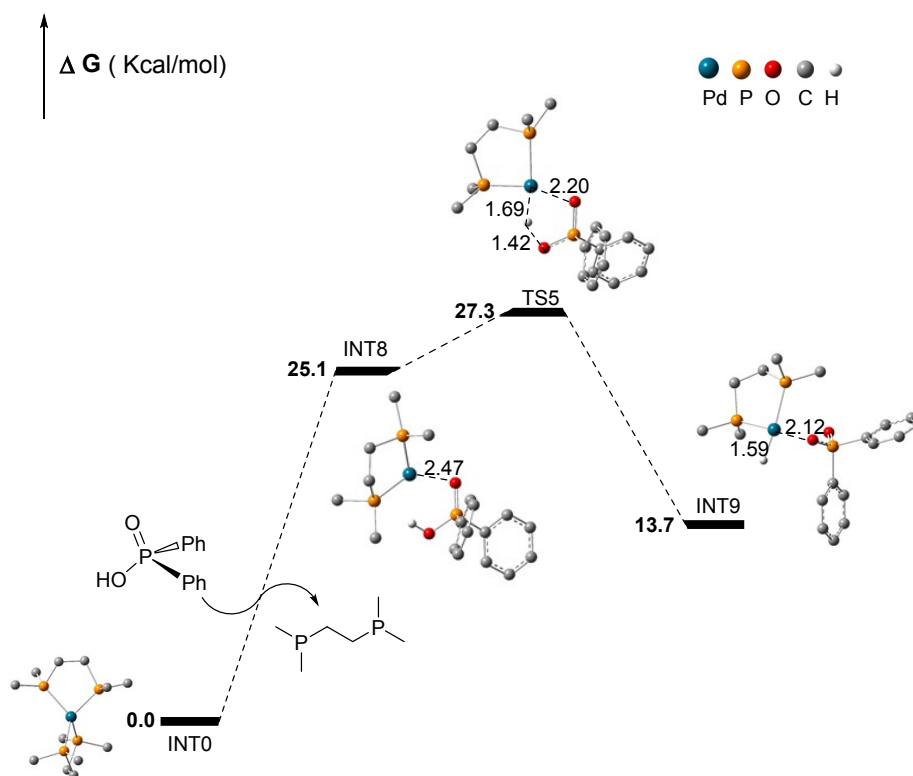

**Figure S1.** Energy profile (in kcal/mol) for the OA of the  $\text{Ph}_2\text{P}(\text{O})\text{OH}$  acid into the  $\text{Pd}(0)$  complex in the absence of the alkyne. Bond lengths are shown in Å.

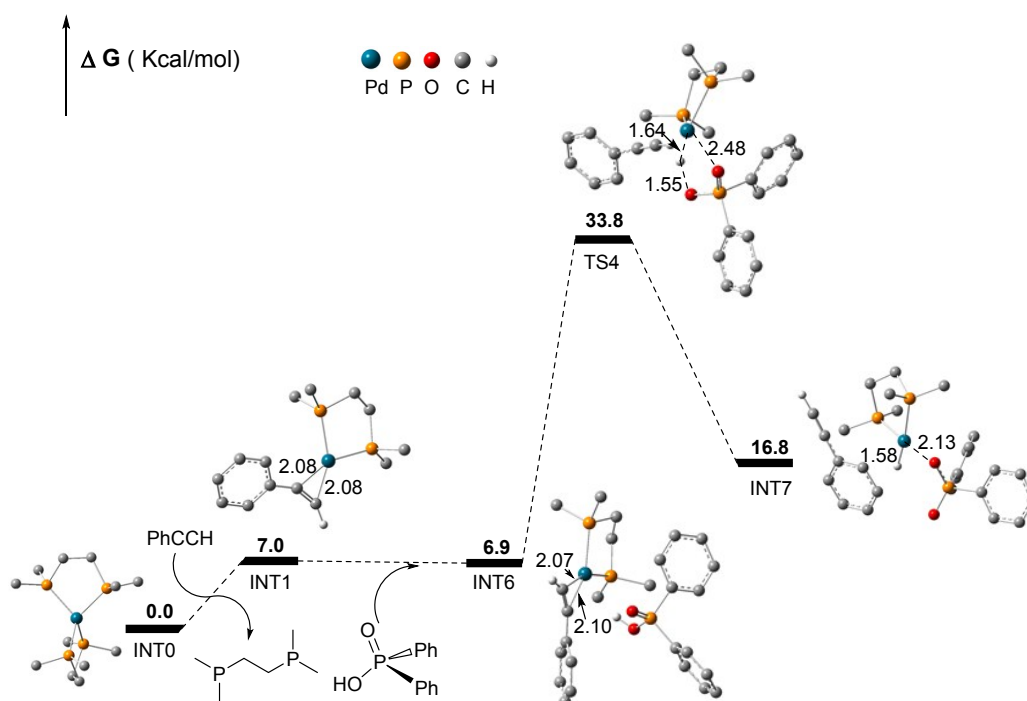

**Figure S2.** Energy profile (in kcal/mol) for the OA of the  $\text{Ph}_2\text{P}(\text{O})\text{OH}$  acid into the  $\text{Pd}(0)$  complex in the presence of the alkyne. Bond lengths are shown in Å.

## 2. Computational studies for the head-to-tail dimerization of ethylacetylene.

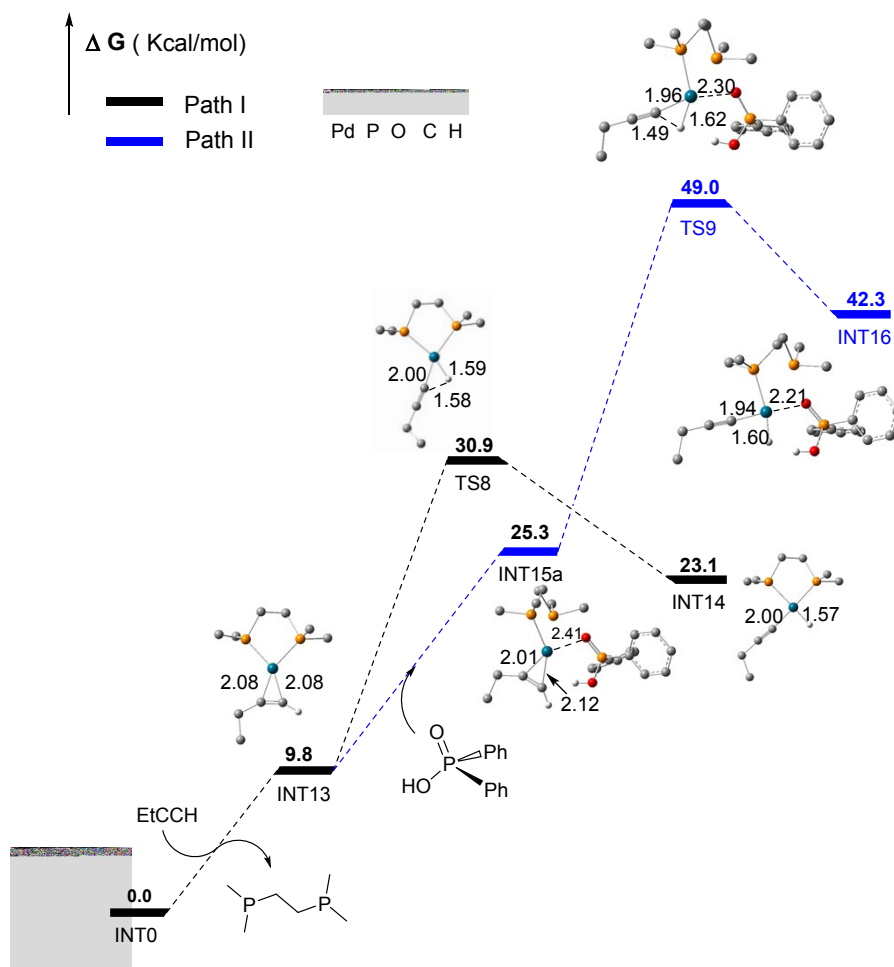

**Figure S3.** Energy profiles (in kcal/mol) for the OA of the  $\text{C}_{\text{sp}}\text{-H}$  bond of ethylacetylene with and without the  $\text{Ph}_2\text{P(O)OH}$  acid. Bond lengths are shown in Å.

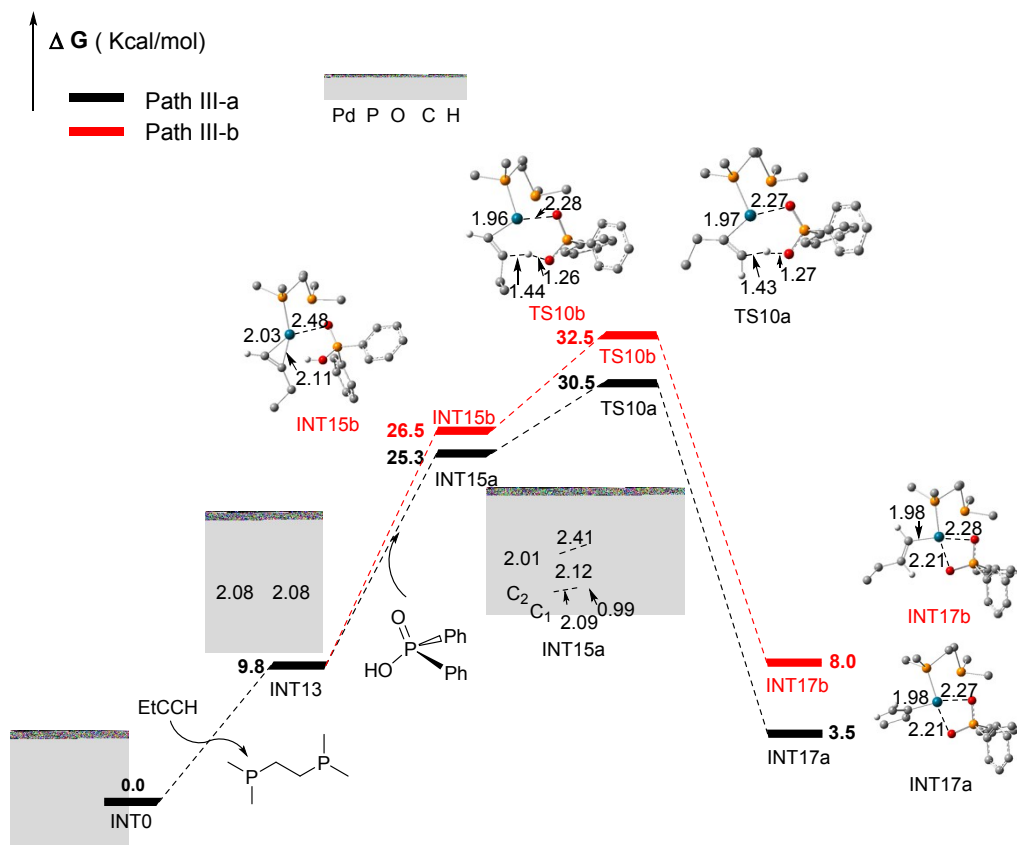

**Figure S4.** Energy profiles (in kcal/mol) for the two proton transfer steps from the acid to the triple bond of ethylacetylene. Bond lengths are shown in Å.

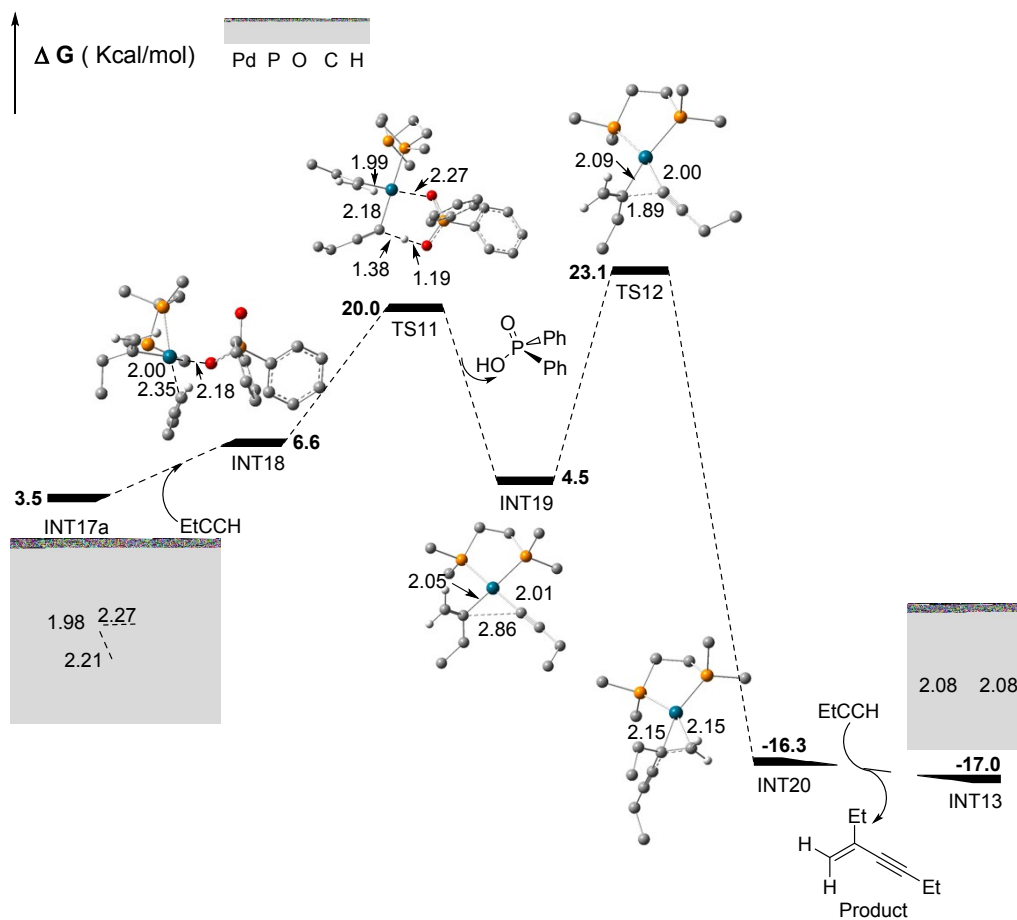

**Figure S5.** Energy profile (in kcal/mol) for the formation of the alkenyl(alkynyl)palladium intermediate and subsequent RE leading to the final product. Bond lengths are shown in Å.

### 3. Cartesian Coordinates and Energies

INTO

| Center<br>Number | Atomic<br>Number | Atomic<br>Type | Coordinates (Angstroms) |           |           |
|------------------|------------------|----------------|-------------------------|-----------|-----------|
|                  |                  |                | X                       | Y         | Z         |
| 1                | 6                | 0              | 3.276056                | -0.287419 | -0.710451 |
| 2                | 1                | 0              | 3.314393                | 0.529475  | -1.441962 |
| 3                | 1                | 0              | 4.160463                | -0.914474 | -0.879728 |
| 4                | 6                | 0              | 3.276127                | 0.287474  | 0.710323  |
| 5                | 1                | 0              | 3.314658                | -0.529397 | 1.441846  |
| 6                | 1                | 0              | 4.160486                | 0.914628  | 0.879474  |
| 7                | 15               | 0              | 1.709794                | -1.241408 | -1.069794 |
| 8                | 15               | 0              | 1.709833                | 1.241329  | 1.069838  |
| 9                | 6                | 0              | 1.929634                | -1.529328 | -2.882760 |
| 10               | 1                | 0              | 2.913772                | -1.944568 | -3.128417 |
| 11               | 1                | 0              | 1.157017                | -2.219764 | -3.232429 |
| 12               | 1                | 0              | 1.795927                | -0.581378 | -3.410829 |
| 13               | 6                | 0              | 2.176391                | -2.912482 | -0.427187 |
| 14               | 1                | 0              | 1.370741                | -3.618604 | -0.645943 |
| 15               | 1                | 0              | 3.110747                | -3.288563 | -0.859571 |
| 16               | 1                | 0              | 2.277996                | -2.853774 | 0.659850  |
| 17               | 6                | 0              | 2.176251                | 2.912488  | 0.427330  |
| 18               | 1                | 0              | 1.370519                | 3.618513  | 0.646107  |
| 19               | 1                | 0              | 3.110560                | 3.288647  | 0.859749  |
| 20               | 1                | 0              | 2.277889                | 2.853846  | -0.659708 |
| 21               | 6                | 0              | 1.929744                | 1.529155  | 2.882808  |
| 22               | 1                | 0              | 2.913895                | 1.944373  | 3.128445  |
| 23               | 1                | 0              | 1.157139                | 2.219607  | 3.232530  |
| 24               | 1                | 0              | 1.796040                | 0.581189  | 3.410853  |
| 25               | 6                | 0              | -3.276004               | 0.710579  | -0.287022 |
| 26               | 6                | 0              | -3.276082               | -0.710559 | 0.286981  |
| 27               | 1                | 0              | -3.314173               | 1.441745  | 0.530181  |
| 28               | 1                | 0              | -4.160373               | 0.880196  | -0.914029 |
| 29               | 1                | 0              | -4.160488               | -0.880090 | 0.913952  |
| 30               | 1                | 0              | -3.314279               | -1.441738 | -0.530208 |
| 31               | 46               | 0              | 0.000059                | 0.000058  | -0.000049 |
| 32               | 15               | 0              | -1.709715               | 1.069956  | -1.240838 |
| 33               | 15               | 0              | -1.709865               | -1.069994 | 1.240848  |
| 34               | 6                | 0              | -1.929113               | -2.883084 | 1.528571  |
| 35               | 1                | 0              | -1.156907               | -3.232389 | 2.219679  |
| 36               | 1                | 0              | -2.913480               | -3.129174 | 1.943015  |
| 37               | 1                | 0              | -1.794402               | -3.411117 | 0.580730  |

|    |   |   |           |           |           |
|----|---|---|-----------|-----------|-----------|
| 38 | 6 | 0 | -2.177174 | -0.428110 | 2.912054  |
| 39 | 1 | 0 | -1.372001 | -0.647833 | 3.618457  |
| 40 | 1 | 0 | -2.278238 | 0.658986  | 2.854167  |
| 41 | 1 | 0 | -3.111908 | -0.860357 | 3.287351  |
| 42 | 6 | 0 | -1.929057 | 2.883059  | -1.528484 |
| 43 | 1 | 0 | -1.156995 | 3.232440  | -2.219572 |
| 44 | 1 | 0 | -2.913466 | 3.129098  | -1.942837 |
| 45 | 1 | 0 | -1.794314 | 3.411041  | -0.580638 |
| 46 | 6 | 0 | -2.177164 | 0.428120  | -2.912029 |
| 47 | 1 | 0 | -3.111749 | 0.860653  | -3.287370 |
| 48 | 1 | 0 | -1.371910 | 0.647467  | -3.618456 |
| 49 | 1 | 0 | -2.278634 | -0.658949 | -2.854021 |

-----

$\omega$ B97XD/6-31G(d,p)-LANL2DZ energy= -1968.64773435  
 $\omega$ B97XD/6-311++G(d,p)-LANL2TZ(f)/SMD energy= -1968.86091875  
Zero-point correction= 0.424687 (Hartree/Particle)  
Thermal correction to Energy= 0.452466  
Thermal correction to Enthalpy= 0.453410  
Thermal correction to Gibbs Free Energy= 0.367894

#### INT1

-----

| Center<br>Number | Atomic<br>Number | Atomic<br>Type | Coordinates (Angstroms) |           |           |
|------------------|------------------|----------------|-------------------------|-----------|-----------|
|                  |                  |                | X                       | Y         | Z         |
| 1                | 46               | 0              | -0.387718               | -0.632862 | -0.037728 |
| 2                | 6                | 0              | 0.798555                | -2.340024 | -0.014147 |
| 3                | 6                | 0              | 1.570498                | -1.331197 | -0.054067 |
| 4                | 6                | 0              | 2.897401                | -0.743058 | -0.069613 |
| 5                | 6                | 0              | 3.120461                | 0.506083  | -0.661027 |
| 6                | 6                | 0              | 3.982788                | -1.414531 | 0.510660  |
| 7                | 6                | 0              | 4.391035                | 1.068549  | -0.677854 |
| 8                | 1                | 0              | 2.275819                | 1.016354  | -1.113587 |
| 9                | 6                | 0              | 5.251255                | -0.845168 | 0.504101  |
| 10               | 1                | 0              | 3.816746                | -2.382342 | 0.973119  |
| 11               | 6                | 0              | 5.461120                | 0.397219  | -0.090243 |
| 12               | 1                | 0              | 4.547550                | 2.034920  | -1.148238 |
| 13               | 1                | 0              | 6.080971                | -1.373734 | 0.964002  |
| 14               | 1                | 0              | 6.452332                | 0.839977  | -0.095189 |
| 15               | 1                | 0              | 0.668979                | -3.407277 | -0.003572 |
| 16               | 6                | 0              | -3.383589               | 0.879002  | 0.453576  |
| 17               | 1                | 0              | -3.325979               | 0.910451  | 1.548491  |
| 18               | 1                | 0              | -4.439469               | 0.995450  | 0.182662  |
| 19               | 6                | 0              | -2.533382               | 2.007212  | -0.145085 |

|    |    |   |           |           |           |
|----|----|---|-----------|-----------|-----------|
| 20 | 1  | 0 | -2.682738 | 2.054430  | -1.230698 |
| 21 | 1  | 0 | -2.827382 | 2.980984  | 0.263647  |
| 22 | 15 | 0 | -2.745309 | -0.795379 | -0.062116 |
| 23 | 15 | 0 | -0.716972 | 1.697062  | 0.133434  |
| 24 | 6  | 0 | -3.796240 | -1.903883 | 0.964523  |
| 25 | 1  | 0 | -4.863446 | -1.692658 | 0.839431  |
| 26 | 1  | 0 | -3.602048 | -2.942118 | 0.684111  |
| 27 | 1  | 0 | -3.525603 | -1.784001 | 2.016538  |
| 28 | 6  | 0 | -3.523414 | -0.992410 | -1.720405 |
| 29 | 1  | 0 | -3.307134 | -1.993484 | -2.101394 |
| 30 | 1  | 0 | -4.608072 | -0.844401 | -1.687814 |
| 31 | 1  | 0 | -3.080018 | -0.272529 | -2.413034 |
| 32 | 6  | 0 | -0.471927 | 2.362207  | 1.833070  |
| 33 | 1  | 0 | 0.590485  | 2.303699  | 2.082612  |
| 34 | 1  | 0 | -0.812436 | 3.398676  | 1.927766  |
| 35 | 1  | 0 | -1.013691 | 1.734714  | 2.545064  |
| 36 | 6  | 0 | 0.037605  | 3.034974  | -0.881404 |
| 37 | 1  | 0 | -0.410678 | 4.011511  | -0.670897 |
| 38 | 1  | 0 | 1.108696  | 3.084487  | -0.667529 |
| 39 | 1  | 0 | -0.086636 | 2.803456  | -1.942273 |

-----

ωB97XD/6-31G(d,p)-LANL2DZ energy= -1356.01928444  
ωB97XD/6-311++G(d,p)-LANL2TZ(f)/SMD energy= -1356.20325669  
Zero-point correction= 0.325038 (Hartree/Particle)  
Thermal correction to Energy= 0.346668  
Thermal correction to Enthalpy= 0.347612  
Thermal correction to Gibbs Free Energy= 0.273054

### TS1

-----

| Center<br>Number | Atomic<br>Number | Atomic<br>Type | Coordinates (Angstroms) |           |           |
|------------------|------------------|----------------|-------------------------|-----------|-----------|
|                  |                  |                | X                       | Y         | Z         |
| 1                | 46               | 0              | -0.661176               | -0.500546 | -0.037312 |
| 2                | 6                | 0              | 1.331461                | -0.529048 | -0.046022 |
| 3                | 6                | 0              | 2.551566                | -0.444558 | -0.036436 |
| 4                | 6                | 0              | 3.973564                | -0.310773 | -0.012913 |
| 5                | 6                | 0              | 4.721177                | -0.329336 | -1.201840 |
| 6                | 6                | 0              | 4.656020                | -0.155603 | 1.205058  |
| 7                | 6                | 0              | 6.104052                | -0.195884 | -1.169576 |
| 8                | 1                | 0              | 4.202437                | -0.450735 | -2.147142 |
| 9                | 6                | 0              | 6.038763                | -0.022544 | 1.229736  |
| 10               | 1                | 0              | 4.085689                | -0.142280 | 2.128189  |
| 11               | 6                | 0              | 6.769995                | -0.041232 | 0.044108  |



|    |    |   |           |           |           |
|----|----|---|-----------|-----------|-----------|
| 12 | 1  | 0 | 6.665209  | -0.212771 | -2.099316 |
| 13 | 1  | 0 | 6.548516  | 0.096937  | 2.181224  |
| 14 | 1  | 0 | 7.850251  | 0.064452  | 0.066151  |
| 15 | 1  | 0 | 0.334597  | -1.742526 | 0.053156  |
| 16 | 6  | 0 | -3.923057 | 0.316556  | 0.463651  |
| 17 | 1  | 0 | -3.830115 | 0.459714  | 1.546955  |
| 18 | 1  | 0 | -4.984635 | 0.146737  | 0.250461  |
| 19 | 6  | 0 | -3.401073 | 1.557830  | -0.274998 |
| 20 | 1  | 0 | -3.581335 | 1.456601  | -1.352047 |
| 21 | 1  | 0 | -3.925164 | 2.461360  | 0.056512  |
| 22 | 15 | 0 | -2.915982 | -1.192368 | 0.040507  |
| 23 | 15 | 0 | -1.560851 | 1.733839  | -0.052413 |
| 24 | 6  | 0 | -3.585422 | -2.440370 | 1.208337  |
| 25 | 1  | 0 | -4.675279 | -2.518311 | 1.142720  |
| 26 | 1  | 0 | -3.140175 | -3.412053 | 0.981976  |
| 27 | 1  | 0 | -3.301234 | -2.171079 | 2.228431  |
| 28 | 6  | 0 | -3.660088 | -1.719088 | -1.556245 |
| 29 | 1  | 0 | -3.194942 | -2.654790 | -1.874885 |
| 30 | 1  | 0 | -4.742386 | -1.860977 | -1.474116 |
| 31 | 1  | 0 | -3.449069 | -0.966804 | -2.320193 |
| 32 | 6  | 0 | -1.437740 | 2.582233  | 1.573692  |
| 33 | 1  | 0 | -0.384785 | 2.786708  | 1.782048  |
| 34 | 1  | 0 | -2.002916 | 3.519505  | 1.597479  |
| 35 | 1  | 0 | -1.805529 | 1.915090  | 2.357365  |
| 36 | 6  | 0 | -1.138425 | 3.080563  | -1.225932 |
| 37 | 1  | 0 | -1.743524 | 3.977630  | -1.061497 |
| 38 | 1  | 0 | -0.081854 | 3.330348  | -1.102157 |
| 39 | 1  | 0 | -1.281891 | 2.727830  | -2.250092 |

-----  
 $\omega$ B97XD/6-31G(d,p)-LANL2DZ energy= -1355.97395436  
 $\omega$ B97XD/6-311++G(d,p)-LANL2TZ(f)/SMD energy= -1356.16458478  
Zero-point correction= 0.320661 (Hartree/Particle)  
Thermal correction to Energy= 0.342460  
Thermal correction to Enthalpy= 0.343404  
Thermal correction to Gibbs Free Energy= 0.267377

## INT2

-----

| Center<br>Number | Atomic<br>Number | Atomic<br>Type | Coordinates (Angstroms) |           |           |
|------------------|------------------|----------------|-------------------------|-----------|-----------|
|                  |                  |                | X                       | Y         | Z         |
| 1                | 46               | 0              | 0.867572                | -0.795997 | -0.041334 |
| 2                | 6                | 0              | -1.129050               | -0.795859 | -0.059956 |
| 3                | 6                | 0              | -2.341177               | -0.635887 | -0.045047 |

|    |    |   |           |           |           |
|----|----|---|-----------|-----------|-----------|
| 4  | 6  | 0 | -3.759379 | -0.449439 | -0.008485 |
| 5  | 6  | 0 | -4.424381 | -0.262117 | 1.214533  |
| 6  | 6  | 0 | -4.520336 | -0.438638 | -1.188832 |
| 7  | 6  | 0 | -5.800117 | -0.070087 | 1.253052  |
| 8  | 1  | 0 | -3.845210 | -0.274815 | 2.132376  |
| 9  | 6  | 0 | -5.896056 | -0.245126 | -1.144323 |
| 10 | 1  | 0 | -4.016741 | -0.588065 | -2.138439 |
| 11 | 6  | 0 | -6.543466 | -0.059214 | 0.074908  |
| 12 | 1  | 0 | -6.295383 | 0.070581  | 2.209443  |
| 13 | 1  | 0 | -6.466465 | -0.241622 | -2.068734 |
| 14 | 1  | 0 | -7.618226 | 0.090968  | 0.107446  |
| 15 | 1  | 0 | 0.791441  | -2.366775 | -0.093269 |
| 16 | 6  | 0 | 3.694126  | 1.020525  | -0.340287 |
| 17 | 1  | 0 | 3.655278  | 1.125447  | -1.431182 |
| 18 | 1  | 0 | 4.732896  | 1.191874  | -0.036601 |
| 19 | 6  | 0 | 2.746280  | 2.036071  | 0.317201  |
| 20 | 1  | 0 | 2.872994  | 2.018252  | 1.406143  |
| 21 | 1  | 0 | 2.968258  | 3.055042  | -0.017409 |
| 22 | 15 | 0 | 3.181266  | -0.730362 | 0.037364  |
| 23 | 15 | 0 | 0.979255  | 1.571380  | -0.026092 |
| 24 | 6  | 0 | 4.246516  | -1.725963 | -1.068666 |
| 25 | 1  | 0 | 5.306253  | -1.492722 | -0.928383 |
| 26 | 1  | 0 | 4.075723  | -2.784224 | -0.858970 |
| 27 | 1  | 0 | 3.964913  | -1.539411 | -2.107452 |
| 28 | 6  | 0 | 3.907958  | -1.030727 | 1.694460  |
| 29 | 1  | 0 | 3.720773  | -2.068978 | 1.977385  |
| 30 | 1  | 0 | 4.984860  | -0.836481 | 1.706831  |
| 31 | 1  | 0 | 3.412019  | -0.391359 | 2.428504  |
| 32 | 6  | 0 | 0.609114  | 2.345097  | -1.644164 |
| 33 | 1  | 0 | -0.427393 | 2.109405  | -1.897895 |
| 34 | 1  | 0 | 0.746776  | 3.430379  | -1.623857 |
| 35 | 1  | 0 | 1.250173  | 1.908486  | -2.413768 |
| 36 | 6  | 0 | -0.023981 | 2.547273  | 1.147668  |
| 37 | 1  | 0 | 0.115172  | 3.624458  | 1.019708  |
| 38 | 1  | 0 | -1.071141 | 2.283255  | 0.977131  |
| 39 | 1  | 0 | 0.230580  | 2.261428  | 2.170891  |

-----

|                                                     |                             |
|-----------------------------------------------------|-----------------------------|
| $\omega$ B97XD/6-31G(d,p)-LANL2DZ energy=           | -1355.98475748              |
| $\omega$ B97XD/6-311++G(d,p)-LANL2TZ(f)/SMD energy= | -1356.17978297              |
| Zero-point correction=                              | 0.322610 (Hartree/Particle) |
| Thermal correction to Energy=                       | 0.344407                    |
| Thermal correction to Enthalpy=                     | 0.345351                    |
| Thermal correction to Gibbs Free Energy=            | 0.270032                    |

INT3a

| Center<br>Number | Atomic<br>Number | Atomic<br>Type | Coordinates (Angstroms) |           |           |
|------------------|------------------|----------------|-------------------------|-----------|-----------|
|                  |                  |                | X                       | Y         | Z         |
| 1                | 46               | 0              | -0.729985               | -0.963102 | -0.230723 |
| 2                | 6                | 0              | -0.964486               | -1.041373 | -2.346483 |
| 3                | 6                | 0              | -2.074710               | -0.928924 | -1.725091 |
| 4                | 1                | 0              | 1.071880                | -1.369391 | -1.907279 |
| 5                | 15               | 0              | 2.416903                | -0.562319 | -0.456838 |
| 6                | 8                | 0              | 2.056826                | -1.311227 | -1.826391 |
| 7                | 8                | 0              | 1.479497                | -0.877663 | 0.682123  |
| 8                | 6                | 0              | -1.783427               | 0.431955  | 2.957934  |
| 9                | 1                | 0              | -2.380280               | 0.197356  | 3.849242  |
| 10               | 1                | 0              | -0.747023               | 0.542720  | 3.295306  |
| 11               | 6                | 0              | -2.277529               | 1.746188  | 2.340850  |
| 12               | 1                | 0              | -2.299893               | 2.507876  | 3.130668  |
| 13               | 1                | 0              | -3.308169               | 1.631810  | 1.982969  |
| 14               | 15               | 0              | -1.815468               | -1.045047 | 1.843261  |
| 15               | 15               | 0              | -1.254413               | 2.402302  | 0.912583  |
| 16               | 6                | 0              | -1.161264               | -2.328595 | 2.986668  |
| 17               | 1                | 0              | -1.667059               | -2.314607 | 3.957759  |
| 18               | 1                | 0              | -1.289197               | -3.311873 | 2.527432  |
| 19               | 1                | 0              | -0.090798               | -2.158996 | 3.125978  |
| 20               | 6                | 0              | -3.609383               | -1.443969 | 1.802822  |
| 21               | 1                | 0              | -3.751112               | -2.383798 | 1.263399  |
| 22               | 1                | 0              | -4.029346               | -1.534246 | 2.810086  |
| 23               | 1                | 0              | -4.147067               | -0.670461 | 1.248796  |
| 24               | 6                | 0              | 0.419391                | 2.385909  | 1.697880  |
| 25               | 1                | 0              | 1.084427                | 3.030746  | 1.116661  |
| 26               | 1                | 0              | 0.396975                | 2.745381  | 2.733528  |
| 27               | 1                | 0              | 0.830758                | 1.373031  | 1.663802  |
| 28               | 6                | 0              | -1.654327               | 4.204565  | 1.118433  |
| 29               | 1                | 0              | -1.459548               | 4.569730  | 2.133502  |
| 30               | 1                | 0              | -1.049978               | 4.786585  | 0.416249  |
| 31               | 1                | 0              | -2.707292               | 4.380972  | 0.878795  |
| 32               | 6                | 0              | -3.515094               | -0.769313 | -1.644046 |
| 33               | 6                | 0              | -4.379636               | -1.836673 | -1.910450 |
| 34               | 6                | 0              | -4.052455               | 0.460025  | -1.236547 |
| 35               | 6                | 0              | -5.754623               | -1.677748 | -1.767418 |
| 36               | 1                | 0              | -3.962766               | -2.790098 | -2.218834 |
| 37               | 6                | 0              | -5.427172               | 0.614988  | -1.103866 |
| 38               | 1                | 0              | -3.370191               | 1.274803  | -1.010734 |

|    |   |   |           |           |           |
|----|---|---|-----------|-----------|-----------|
| 39 | 6 | 0 | -6.283250 | -0.454611 | -1.363233 |
| 40 | 1 | 0 | -6.416434 | -2.513759 | -1.972806 |
| 41 | 1 | 0 | -5.833561 | 1.572049  | -0.790190 |
| 42 | 1 | 0 | -7.356037 | -0.334115 | -1.250016 |
| 43 | 1 | 0 | -0.588587 | -1.066549 | -3.359469 |
| 44 | 6 | 0 | 2.466237  | 1.204900  | -0.850678 |
| 45 | 6 | 0 | 3.480948  | 2.026962  | -0.353098 |
| 46 | 6 | 0 | 1.416592  | 1.769625  | -1.583616 |
| 47 | 6 | 0 | 3.447705  | 3.398656  | -0.586511 |
| 48 | 1 | 0 | 4.299536  | 1.597795  | 0.216932  |
| 49 | 6 | 0 | 1.384833  | 3.141002  | -1.810964 |
| 50 | 1 | 0 | 0.609224  | 1.143435  | -1.952144 |
| 51 | 6 | 0 | 2.399379  | 3.956365  | -1.314315 |
| 52 | 1 | 0 | 4.239487  | 4.031762  | -0.198959 |
| 53 | 1 | 0 | 0.560710  | 3.571381  | -2.370464 |
| 54 | 1 | 0 | 2.372769  | 5.026787  | -1.493940 |
| 55 | 6 | 0 | 4.103624  | -1.092843 | -0.118721 |
| 56 | 6 | 0 | 4.388465  | -1.652752 | 1.127363  |
| 57 | 6 | 0 | 5.115864  | -0.952778 | -1.073526 |
| 58 | 6 | 0 | 5.683481  | -2.073743 | 1.417560  |
| 59 | 1 | 0 | 3.590292  | -1.757155 | 1.855365  |
| 60 | 6 | 0 | 6.406777  | -1.374615 | -0.779339 |
| 61 | 1 | 0 | 4.893916  | -0.514695 | -2.041991 |
| 62 | 6 | 0 | 6.689326  | -1.934582 | 0.465992  |
| 63 | 1 | 0 | 5.904972  | -2.512828 | 2.384940  |
| 64 | 1 | 0 | 7.192352  | -1.270182 | -1.520690 |
| 65 | 1 | 0 | 7.698826  | -2.263438 | 0.692843  |

-----  
 $\omega$ B97XD/6-31G(d,p)-LANL2DZ energy= -2311.56630885  
 $\omega$ B97XD/6-311++G(d,p)-LANL2TZ(f)/SMD energy= -2311.91811661  
Zero-point correction= 0.531189 (Hartree/Particle)  
Thermal correction to Energy= 0.567190  
Thermal correction to Enthalpy= 0.568134  
Thermal correction to Gibbs Free Energy= 0.459739

### TS3a

-----

| Center<br>Number | Atomic<br>Number | Atomic<br>Type | Coordinates (Angstroms) |           |           |
|------------------|------------------|----------------|-------------------------|-----------|-----------|
|                  |                  |                | X                       | Y         | Z         |
| 1                | 46               | 0              | -0.725264               | -0.856461 | -0.032070 |
| 2                | 6                | 0              | -0.922776               | -1.179955 | -2.220176 |
| 3                | 6                | 0              | -2.007504               | -1.052772 | -1.514329 |
| 4                | 1                | 0              | 0.438413                | -1.180422 | -1.815408 |

|    |    |   |           |           |           |
|----|----|---|-----------|-----------|-----------|
| 5  | 15 | 0 | 2.283255  | -0.558805 | -0.462786 |
| 6  | 8  | 0 | 1.703952  | -1.171951 | -1.760882 |
| 7  | 8  | 0 | 1.389075  | -0.661485 | 0.775162  |
| 8  | 6  | 0 | -1.875630 | 0.854345  | 2.795474  |
| 9  | 1  | 0 | -2.533409 | 0.771739  | 3.670398  |
| 10 | 1  | 0 | -0.854653 | 0.964806  | 3.176912  |
| 11 | 6  | 0 | -2.264073 | 2.084414  | 1.964632  |
| 12 | 1  | 0 | -2.318842 | 2.946400  | 2.641755  |
| 13 | 1  | 0 | -3.266410 | 1.953910  | 1.537878  |
| 14 | 15 | 0 | -1.925996 | -0.760547 | 1.903380  |
| 15 | 15 | 0 | -1.093639 | 2.500990  | 0.559056  |
| 16 | 6  | 0 | -1.286026 | -1.906923 | 3.183668  |
| 17 | 1  | 0 | -1.790281 | -1.768263 | 4.145375  |
| 18 | 1  | 0 | -1.427031 | -2.935950 | 2.845066  |
| 19 | 1  | 0 | -0.213653 | -1.731815 | 3.297868  |
| 20 | 6  | 0 | -3.717966 | -1.142707 | 1.858326  |
| 21 | 1  | 0 | -3.866096 | -2.125410 | 1.404739  |
| 22 | 1  | 0 | -4.148434 | -1.133005 | 2.864402  |
| 23 | 1  | 0 | -4.237591 | -0.414687 | 1.230903  |
| 24 | 6  | 0 | 0.489433  | 2.614395  | 1.506300  |
| 25 | 1  | 0 | 1.206589  | 3.191622  | 0.916348  |
| 26 | 1  | 0 | 0.357387  | 3.104281  | 2.478413  |
| 27 | 1  | 0 | 0.909878  | 1.613297  | 1.639353  |
| 28 | 6  | 0 | -1.487165 | 4.309754  | 0.421796  |
| 29 | 1  | 0 | -1.403061 | 4.835726  | 1.379643  |
| 30 | 1  | 0 | -0.791427 | 4.764929  | -0.289353 |
| 31 | 1  | 0 | -2.500198 | 4.445044  | 0.031190  |
| 32 | 6  | 0 | -3.459314 | -0.959662 | -1.546276 |
| 33 | 6  | 0 | -4.257140 | -2.105089 | -1.637787 |
| 34 | 6  | 0 | -4.072769 | 0.293265  | -1.409933 |
| 35 | 6  | 0 | -5.643819 | -1.998799 | -1.588860 |
| 36 | 1  | 0 | -3.780289 | -3.075009 | -1.737871 |
| 37 | 6  | 0 | -5.458455 | 0.394330  | -1.368007 |
| 38 | 1  | 0 | -3.444034 | 1.175348  | -1.325769 |
| 39 | 6  | 0 | -6.248158 | -0.752005 | -1.450502 |
| 40 | 1  | 0 | -6.254079 | -2.894213 | -1.657022 |
| 41 | 1  | 0 | -5.925388 | 1.369233  | -1.265229 |
| 42 | 1  | 0 | -7.329854 | -0.671847 | -1.408559 |
| 43 | 1  | 0 | -0.810309 | -1.285187 | -3.295618 |
| 44 | 6  | 0 | 2.629269  | 1.190826  | -0.812049 |
| 45 | 6  | 0 | 3.651358  | 1.882849  | -0.158779 |
| 46 | 6  | 0 | 1.781841  | 1.878442  | -1.685229 |
| 47 | 6  | 0 | 3.824338  | 3.246887  | -0.373277 |
| 48 | 1  | 0 | 4.317197  | 1.352640  | 0.516527  |

|    |   |   |          |           |           |
|----|---|---|----------|-----------|-----------|
| 49 | 6 | 0 | 1.950458 | 3.244100  | -1.894189 |
| 50 | 1 | 0 | 0.987611 | 1.341206  | -2.194500 |
| 51 | 6 | 0 | 2.971645 | 3.929172  | -1.238811 |
| 52 | 1 | 0 | 4.624790 | 3.777190  | 0.133279  |
| 53 | 1 | 0 | 1.286756 | 3.772564  | -2.571568 |
| 54 | 1 | 0 | 3.107592 | 4.993229  | -1.406865 |
| 55 | 6 | 0 | 3.874137 | -1.343149 | -0.117293 |
| 56 | 6 | 0 | 4.217392 | -1.643150 | 1.202556  |
| 57 | 6 | 0 | 4.772097 | -1.624183 | -1.150945 |
| 58 | 6 | 0 | 5.453269 | -2.217370 | 1.487773  |
| 59 | 1 | 0 | 3.504093 | -1.431539 | 1.992875  |
| 60 | 6 | 0 | 6.005035 | -2.198709 | -0.863128 |
| 61 | 1 | 0 | 4.497375 | -1.402424 | -2.177644 |
| 62 | 6 | 0 | 6.346230 | -2.492903 | 0.456169  |
| 63 | 1 | 0 | 5.716873 | -2.451713 | 2.514502  |
| 64 | 1 | 0 | 6.700503 | -2.421430 | -1.666236 |
| 65 | 1 | 0 | 7.309393 | -2.942565 | 0.677710  |

-----

$\omega$ B97XD/6-31G(d,p)-LANL2DZ energy= -2311.55319901  
 $\omega$ B97XD/6-311++G(d,p)-LANL2TZ(f)/SMD energy= -2311.90688472  
Zero-point correction= 0.525835 (Hartree/Particle)  
Thermal correction to Energy= 0.561345  
Thermal correction to Enthalpy= 0.562289  
Thermal correction to Gibbs Free Energy= 0.455014

### INT5a

-----

| Center<br>Number | Atomic<br>Number | Atomic<br>Type | Coordinates (Angstroms) |           |           |
|------------------|------------------|----------------|-------------------------|-----------|-----------|
|                  |                  |                | X                       | Y         | Z         |
| 1                | 46               | 0              | 0.630666                | -1.199668 | -0.021353 |
| 2                | 6                | 0              | 2.435170                | -3.011401 | 1.426667  |
| 3                | 6                | 0              | 2.054135                | -1.743805 | 1.250496  |
| 4                | 1                | 0              | 2.058131                | -3.822036 | 0.809546  |
| 5                | 15               | 0              | -1.915986               | -0.285188 | 0.223020  |
| 6                | 8                | 0              | -1.033626               | -0.770202 | 1.386177  |
| 7                | 8                | 0              | -1.255261               | -0.591585 | -1.134801 |
| 8                | 6                | 0              | 1.693570                | -0.389285 | -3.114538 |
| 9                | 1                | 0              | 2.160485                | -0.843356 | -3.997577 |
| 10               | 1                | 0              | 0.608002                | -0.476208 | -3.233535 |
| 11               | 6                | 0              | 2.114717                | 1.082691  | -3.008454 |
| 12               | 1                | 0              | 1.896938                | 1.575331  | -3.964649 |
| 13               | 1                | 0              | 3.199451                | 1.153905  | -2.864680 |
| 14               | 15               | 0              | 2.135013                | -1.439960 | -1.662742 |

|    |    |   |           |           |           |
|----|----|---|-----------|-----------|-----------|
| 15 | 15 | 0 | 1.301893  | 2.042177  | -1.623976 |
| 16 | 6  | 0 | 2.182329  | -3.127223 | -2.368423 |
| 17 | 1  | 0 | 2.901381  | -3.192568 | -3.190519 |
| 18 | 1  | 0 | 2.464726  | -3.833162 | -1.584385 |
| 19 | 1  | 0 | 1.185961  | -3.390654 | -2.730563 |
| 20 | 6  | 0 | 3.890643  | -1.062534 | -1.333228 |
| 21 | 1  | 0 | 4.289909  | -1.834876 | -0.673474 |
| 22 | 1  | 0 | 4.465637  | -1.035389 | -2.263541 |
| 23 | 1  | 0 | 3.964966  | -0.102815 | -0.816787 |
| 24 | 6  | 0 | -0.355776 | 2.309654  | -2.391883 |
| 25 | 1  | 0 | -0.910267 | 3.046115  | -1.803468 |
| 26 | 1  | 0 | -0.275643 | 2.664142  | -3.426098 |
| 27 | 1  | 0 | -0.914293 | 1.370431  | -2.352233 |
| 28 | 6  | 0 | 2.076209  | 3.689918  | -1.972118 |
| 29 | 1  | 0 | 1.973067  | 3.989956  | -3.021077 |
| 30 | 1  | 0 | 1.593320  | 4.444710  | -1.344970 |
| 31 | 1  | 0 | 3.138249  | 3.668404  | -1.711188 |
| 32 | 6  | 0 | 2.581927  | -0.618260 | 2.055480  |
| 33 | 6  | 0 | 3.961561  | -0.402324 | 2.159280  |
| 34 | 6  | 0 | 1.712000  | 0.254259  | 2.726545  |
| 35 | 6  | 0 | 4.461810  | 0.662158  | 2.904242  |
| 36 | 1  | 0 | 4.642847  | -1.077833 | 1.650202  |
| 37 | 6  | 0 | 2.215129  | 1.313264  | 3.472071  |
| 38 | 1  | 0 | 0.641973  | 0.078535  | 2.658595  |
| 39 | 6  | 0 | 3.590016  | 1.526177  | 3.559365  |
| 40 | 1  | 0 | 5.534776  | 0.815117  | 2.973743  |
| 41 | 1  | 0 | 1.528980  | 1.974849  | 3.992799  |
| 42 | 1  | 0 | 3.978952  | 2.358473  | 4.137947  |
| 43 | 1  | 0 | 3.106739  | -3.283463 | 2.240427  |
| 44 | 6  | 0 | -2.177399 | 1.504072  | 0.397024  |
| 45 | 6  | 0 | -3.279193 | 2.142674  | -0.176271 |
| 46 | 6  | 0 | -1.192727 | 2.267008  | 1.031257  |
| 47 | 6  | 0 | -3.393371 | 3.528653  | -0.123893 |
| 48 | 1  | 0 | -4.052644 | 1.555666  | -0.664085 |
| 49 | 6  | 0 | -1.306487 | 3.652888  | 1.081744  |
| 50 | 1  | 0 | -0.332076 | 1.773224  | 1.469729  |
| 51 | 6  | 0 | -2.405081 | 4.284870  | 0.502697  |
| 52 | 1  | 0 | -4.253456 | 4.018024  | -0.570163 |
| 53 | 1  | 0 | -0.536068 | 4.238690  | 1.573866  |
| 54 | 1  | 0 | -2.495613 | 5.366131  | 0.545701  |
| 55 | 6  | 0 | -3.556181 | -1.043603 | 0.295520  |
| 56 | 6  | 0 | -4.197466 | -1.444256 | -0.878385 |
| 57 | 6  | 0 | -4.190701 | -1.215953 | 1.528955  |
| 58 | 6  | 0 | -5.470539 | -2.005440 | -0.819317 |

|    |   |   |           |           |           |
|----|---|---|-----------|-----------|-----------|
| 59 | 1 | 0 | -3.686885 | -1.322267 | -1.828754 |
| 60 | 6 | 0 | -5.460189 | -1.779963 | 1.585241  |
| 61 | 1 | 0 | -3.681353 | -0.919056 | 2.440876  |
| 62 | 6 | 0 | -6.100849 | -2.171545 | 0.410905  |
| 63 | 1 | 0 | -5.967968 | -2.318316 | -1.732150 |
| 64 | 1 | 0 | -5.949514 | -1.918852 | 2.544162  |
| 65 | 1 | 0 | -7.091600 | -2.613434 | 0.457128  |

-----

ωB97XD/6-31G(d,p)-LANL2DZ energy= -2311.60331992  
ωB97XD/6-311++G(d,p)-LANL2TZ(f)/SMD energy= -2311.95628027  
Zero-point correction= 0.534299 (Hartree/Particle)  
Thermal correction to Energy= 0.569260  
Thermal correction to Enthalpy= 0.570204  
Thermal correction to Gibbs Free Energy= 0.465525

### INT3b

-----

| Center<br>Number | Atomic<br>Number | Atomic<br>Type | Coordinates (Angstroms) |           |           |
|------------------|------------------|----------------|-------------------------|-----------|-----------|
|                  |                  |                | X                       | Y         | Z         |
| 1                | 46               | 0              | -1.337515               | 0.570299  | -1.102489 |
| 2                | 6                | 0              | 0.513022                | 3.459607  | -0.842057 |
| 3                | 6                | 0              | 1.526556                | 3.660376  | -1.789574 |
| 4                | 6                | 0              | 0.628462                | 4.088403  | 0.407039  |
| 5                | 6                | 0              | 2.617926                | 4.470774  | -1.497224 |
| 6                | 1                | 0              | 1.447994                | 3.176329  | -2.758708 |
| 7                | 6                | 0              | 1.724099                | 4.893408  | 0.695922  |
| 8                | 1                | 0              | -0.153707               | 3.935684  | 1.144975  |
| 9                | 6                | 0              | 2.724564                | 5.087828  | -0.253697 |
| 10               | 1                | 0              | 3.390926                | 4.617254  | -2.245601 |
| 11               | 1                | 0              | 1.797466                | 5.371866  | 1.668018  |
| 12               | 1                | 0              | 3.581183                | 5.713971  | -0.024973 |
| 13               | 6                | 0              | -0.616246               | 2.585274  | -1.118397 |
| 14               | 6                | 0              | -1.858047               | 2.479698  | -1.385050 |
| 15               | 1                | 0              | -2.780408               | 2.978851  | -1.631630 |
| 16               | 1                | 0              | 1.189897                | 1.063124  | -1.348476 |
| 17               | 15               | 0              | 1.472806                | -0.826464 | -0.371064 |
| 18               | 8                | 0              | 1.932709                | 0.432457  | -1.251273 |
| 19               | 8                | 0              | 0.076801                | -1.314238 | -0.664290 |
| 20               | 6                | 0              | -3.412850               | -2.109631 | 0.037716  |
| 21               | 1                | 0              | -4.188397               | -2.823353 | -0.269896 |
| 22               | 1                | 0              | -2.488850               | -2.682166 | 0.175707  |
| 23               | 6                | 0              | -3.826871               | -1.442274 | 1.355589  |
| 24               | 1                | 0              | -4.132828               | -2.227068 | 2.059963  |



|    |    |   |           |           |           |
|----|----|---|-----------|-----------|-----------|
| 25 | 1  | 0 | -4.706795 | -0.806258 | 1.198962  |
| 26 | 15 | 0 | -3.089641 | -0.964787 | -1.380170 |
| 27 | 15 | 0 | -2.509745 | -0.396878 | 2.179033  |
| 28 | 6  | 0 | -2.820315 | -2.190097 | -2.724715 |
| 29 | 1  | 0 | -3.610116 | -2.947553 | -2.766259 |
| 30 | 1  | 0 | -2.769159 | -1.666833 | -3.682628 |
| 31 | 1  | 0 | -1.854710 | -2.672422 | -2.553402 |
| 32 | 6  | 0 | -4.776498 | -0.337236 | -1.758059 |
| 33 | 1  | 0 | -4.744461 | 0.208343  | -2.704748 |
| 34 | 1  | 0 | -5.513318 | -1.144119 | -1.831529 |
| 35 | 1  | 0 | -5.084640 | 0.365039  | -0.979491 |
| 36 | 6  | 0 | -1.269744 | -1.727960 | 2.515408  |
| 37 | 1  | 0 | -0.523033 | -1.356075 | 3.223002  |
| 38 | 1  | 0 | -1.731879 | -2.632901 | 2.927428  |
| 39 | 1  | 0 | -0.751040 | -1.968645 | 1.584151  |
| 40 | 6  | 0 | -3.294165 | -0.293296 | 3.859332  |
| 41 | 1  | 0 | -3.574243 | -1.274681 | 4.259571  |
| 42 | 1  | 0 | -2.591317 | 0.178052  | 4.552682  |
| 43 | 1  | 0 | -4.188064 | 0.335938  | 3.813740  |
| 44 | 6  | 0 | 1.681935  | -0.348960 | 1.360082  |
| 45 | 6  | 0 | 2.369914  | -1.167268 | 2.259117  |
| 46 | 6  | 0 | 1.060196  | 0.817087  | 1.819154  |
| 47 | 6  | 0 | 2.434709  | -0.823321 | 3.606164  |
| 48 | 1  | 0 | 2.853351  | -2.074829 | 1.910628  |
| 49 | 6  | 0 | 1.128032  | 1.157049  | 3.164883  |
| 50 | 1  | 0 | 0.507591  | 1.448791  | 1.131458  |
| 51 | 6  | 0 | 1.813951  | 0.337790  | 4.059167  |
| 52 | 1  | 0 | 2.971576  | -1.461861 | 4.300304  |
| 53 | 1  | 0 | 0.642321  | 2.062818  | 3.512923  |
| 54 | 1  | 0 | 1.867046  | 0.604773  | 5.110199  |
| 55 | 6  | 0 | 2.727228  | -2.056559 | -0.756975 |
| 56 | 6  | 0 | 4.086558  | -1.727921 | -0.773569 |
| 57 | 6  | 0 | 2.319486  | -3.366195 | -1.015174 |
| 58 | 6  | 0 | 5.030744  | -2.709763 | -1.048527 |
| 59 | 1  | 0 | 4.400179  | -0.707192 | -0.577537 |
| 60 | 6  | 0 | 3.269405  | -4.346297 | -1.288519 |
| 61 | 1  | 0 | 1.260059  | -3.602344 | -1.007031 |
| 62 | 6  | 0 | 4.621900  | -4.018160 | -1.303828 |
| 63 | 1  | 0 | 6.085869  | -2.456635 | -1.066499 |
| 64 | 1  | 0 | 2.953963  | -5.364717 | -1.491027 |
| 65 | 1  | 0 | 5.362176  | -4.782886 | -1.517513 |

-----  
 $\omega$ B97XD/6-31G(d,p)-LANL2DZ energy= -2311.56135316  
 $\omega$ B97XD/6-311++G(d,p)-LANL2TZ(f)/SMD energy= -2311.91441471

Zero-point correction= 0.530950 (Hartree/Particle)  
 Thermal correction to Energy= 0.567451  
 Thermal correction to Enthalpy= 0.568395  
 Thermal correction to Gibbs Free Energy= 0.456063

**TS3b**

| Center<br>Number | Atomic<br>Number | Atomic<br>Type | Coordinates (Angstroms) |           |           |
|------------------|------------------|----------------|-------------------------|-----------|-----------|
|                  |                  |                | X                       | Y         | Z         |
| 1                | 46               | 0              | -1.197813               | 0.226973  | -1.045191 |
| 2                | 6                | 0              | -0.200441               | 3.700845  | -0.246652 |
| 3                | 6                | 0              | 1.130984                | 4.064006  | -0.482388 |
| 4                | 6                | 0              | -1.034045               | 4.607650  | 0.425158  |
| 5                | 6                | 0              | 1.605964                | 5.306578  | -0.074450 |
| 6                | 1                | 0              | 1.792878                | 3.365625  | -0.981449 |
| 7                | 6                | 0              | -0.554891               | 5.845127  | 0.836054  |
| 8                | 1                | 0              | -2.061782               | 4.325269  | 0.632765  |
| 9                | 6                | 0              | 0.768757                | 6.201120  | 0.585222  |
| 10               | 1                | 0              | 2.640555                | 5.572483  | -0.269311 |
| 11               | 1                | 0              | -1.214764               | 6.531432  | 1.358413  |
| 12               | 1                | 0              | 1.146139                | 7.166233  | 0.909280  |
| 13               | 6                | 0              | -0.736219               | 2.394965  | -0.680890 |
| 14               | 6                | 0              | -1.947338               | 2.026877  | -0.997178 |
| 15               | 1                | 0              | -2.926161               | 2.457021  | -1.155308 |
| 16               | 1                | 0              | 0.440038                | 1.527632  | -0.684724 |
| 17               | 15               | 0              | 1.677822                | -0.451064 | -0.315804 |
| 18               | 8                | 0              | 1.604454                | 1.067038  | -0.626942 |
| 19               | 8                | 0              | 0.496520                | -1.272733 | -0.835645 |
| 20               | 6                | 0              | -3.193564               | -2.591938 | -0.542796 |
| 21               | 1                | 0              | -3.969855               | -3.212663 | -1.008864 |
| 22               | 1                | 0              | -2.261981               | -3.168281 | -0.571361 |
| 23               | 6                | 0              | -3.581798               | -2.281318 | 0.908591  |
| 24               | 1                | 0              | -3.801742               | -3.231827 | 1.411791  |
| 25               | 1                | 0              | -4.507721               | -1.693901 | 0.935630  |
| 26               | 15               | 0              | -2.922965               | -1.128978 | -1.635415 |
| 27               | 15               | 0              | -2.286730               | -1.363262 | 1.902719  |
| 28               | 6                | 0              | -2.741173               | -1.927296 | -3.276454 |
| 29               | 1                | 0              | -3.567701               | -2.611771 | -3.492472 |
| 30               | 1                | 0              | -2.696562               | -1.155291 | -4.047899 |
| 31               | 1                | 0              | -1.796709               | -2.476403 | -3.293034 |
| 32               | 6                | 0              | -4.586074               | -0.363319 | -1.724354 |
| 33               | 1                | 0              | -4.578802               | 0.412849  | -2.493490 |
| 34               | 1                | 0              | -5.360370               | -1.099779 | -1.960328 |

|    |   |   |           |           |           |
|----|---|---|-----------|-----------|-----------|
| 35 | 1 | 0 | -4.812981 | 0.112177  | -0.767223 |
| 36 | 6 | 0 | -0.956105 | -2.643579 | 1.882124  |
| 37 | 1 | 0 | -0.237621 | -2.418148 | 2.674821  |
| 38 | 1 | 0 | -1.352005 | -3.654221 | 2.037786  |
| 39 | 1 | 0 | -0.420259 | -2.587182 | 0.930407  |
| 40 | 6 | 0 | -2.990363 | -1.684413 | 3.589113  |
| 41 | 1 | 0 | -3.181842 | -2.748015 | 3.771969  |
| 42 | 1 | 0 | -2.279591 | -1.324238 | 4.338586  |
| 43 | 1 | 0 | -3.924257 | -1.129817 | 3.719022  |
| 44 | 6 | 0 | 1.791654  | -0.612225 | 1.487736  |
| 45 | 6 | 0 | 2.492664  | -1.656610 | 2.094245  |
| 46 | 6 | 0 | 1.057125  | 0.276813  | 2.278237  |
| 47 | 6 | 0 | 2.452934  | -1.817499 | 3.476053  |
| 48 | 1 | 0 | 3.071253  | -2.345539 | 1.485060  |
| 49 | 6 | 0 | 1.009274  | 0.108432  | 3.658447  |
| 50 | 1 | 0 | 0.523129  | 1.099326  | 1.811559  |
| 51 | 6 | 0 | 1.704726  | -0.939740 | 4.257946  |
| 52 | 1 | 0 | 3.000963  | -2.630160 | 3.942570  |
| 53 | 1 | 0 | 0.431060  | 0.797927  | 4.265419  |
| 54 | 1 | 0 | 1.669094  | -1.069198 | 5.335447  |
| 55 | 6 | 0 | 3.216229  | -1.099349 | -1.002515 |
| 56 | 6 | 0 | 4.421344  | -0.412826 | -0.826073 |
| 57 | 6 | 0 | 3.201111  | -2.311728 | -1.694170 |
| 58 | 6 | 0 | 5.601758  | -0.939396 | -1.337451 |
| 59 | 1 | 0 | 4.429407  | 0.534760  | -0.295851 |
| 60 | 6 | 0 | 4.385076  | -2.836205 | -2.205635 |
| 61 | 1 | 0 | 2.255769  | -2.827093 | -1.831029 |
| 62 | 6 | 0 | 5.583554  | -2.151554 | -2.026042 |
| 63 | 1 | 0 | 6.537201  | -0.405735 | -1.202187 |
| 64 | 1 | 0 | 4.371722  | -3.778237 | -2.744920 |
| 65 | 1 | 0 | 6.506358  | -2.561357 | -2.425345 |

-----

|                                                     |                             |
|-----------------------------------------------------|-----------------------------|
| $\omega$ B97XD/6-31G(d,p)-LANL2DZ energy=           | -2311.54600763              |
| $\omega$ B97XD/6-311++G(d,p)-LANL2TZ(f)/SMD energy= | -2311.90010217              |
| Zero-point correction=                              | 0.527449 (Hartree/Particle) |
| Thermal correction to Energy=                       | 0.562619                    |
| Thermal correction to Enthalpy=                     | 0.563563                    |
| Thermal correction to Gibbs Free Energy=            | 0.455955                    |

### INT5b

-----

| Center | Atomic | Atomic | Coordinates (Angstroms) |   |   |
|--------|--------|--------|-------------------------|---|---|
| Number | Number | Type   | X                       | Y | Z |

-----

|    |    |   |           |           |           |
|----|----|---|-----------|-----------|-----------|
| 1  | 46 | 0 | 0.649787  | 0.183789  | -0.901336 |
| 2  | 6  | 0 | 4.045786  | -1.883987 | 0.679970  |
| 3  | 6  | 0 | 4.091111  | -3.144742 | 1.288687  |
| 4  | 6  | 0 | 5.255641  | -1.203538 | 0.485405  |
| 5  | 6  | 0 | 5.299607  | -3.716774 | 1.670591  |
| 6  | 1  | 0 | 3.160640  | -3.680959 | 1.455071  |
| 7  | 6  | 0 | 6.464511  | -1.773862 | 0.864320  |
| 8  | 1  | 0 | 5.248141  | -0.210210 | 0.046191  |
| 9  | 6  | 0 | 6.493938  | -3.034849 | 1.457050  |
| 10 | 1  | 0 | 5.308075  | -4.697123 | 2.137442  |
| 11 | 1  | 0 | 7.390469  | -1.229103 | 0.704723  |
| 12 | 1  | 0 | 7.438914  | -3.477692 | 1.755870  |
| 13 | 6  | 0 | 2.734378  | -1.333457 | 0.282158  |
| 14 | 6  | 0 | 2.527421  | -0.322722 | -0.568732 |
| 15 | 1  | 0 | 3.371055  | 0.170583  | -1.049503 |
| 16 | 1  | 0 | 1.867995  | -1.833058 | 0.714426  |
| 17 | 15 | 0 | -1.736095 | -0.869048 | -0.145819 |
| 18 | 8  | 0 | -0.359442 | -1.515913 | 0.084464  |
| 19 | 8  | 0 | -1.604150 | 0.364985  | -1.061344 |
| 20 | 6  | 0 | 0.084310  | 3.423242  | -1.624722 |
| 21 | 1  | 0 | 0.227891  | 4.174532  | -2.411807 |
| 22 | 1  | 0 | -0.916275 | 2.996357  | -1.756257 |
| 23 | 6  | 0 | 0.217746  | 4.085369  | -0.246622 |
| 24 | 1  | 0 | -0.423636 | 4.976033  | -0.231897 |
| 25 | 1  | 0 | 1.243592  | 4.442445  | -0.094806 |
| 26 | 15 | 0 | 1.262689  | 2.049605  | -1.968990 |
| 27 | 15 | 0 | -0.230325 | 2.995617  | 1.207297  |
| 28 | 6  | 0 | 1.160423  | 1.878805  | -3.788426 |
| 29 | 1  | 0 | 1.376911  | 2.825554  | -4.292575 |
| 30 | 1  | 0 | 1.869787  | 1.116883  | -4.118748 |
| 31 | 1  | 0 | 0.153694  | 1.545466  | -4.051040 |
| 32 | 6  | 0 | 2.914003  | 2.783322  | -1.690527 |
| 33 | 1  | 0 | 3.682355  | 2.134442  | -2.116844 |
| 34 | 1  | 0 | 2.981963  | 3.768273  | -2.161345 |
| 35 | 1  | 0 | 3.097269  | 2.872697  | -0.617644 |
| 36 | 6  | 0 | -2.063016 | 2.963274  | 0.983438  |
| 37 | 1  | 0 | -2.525180 | 2.554164  | 1.886326  |
| 38 | 1  | 0 | -2.474538 | 3.961232  | 0.792435  |
| 39 | 1  | 0 | -2.305777 | 2.287853  | 0.158487  |
| 40 | 6  | 0 | -0.101290 | 4.285461  | 2.532972  |
| 41 | 1  | 0 | -0.647301 | 5.203241  | 2.286600  |
| 42 | 1  | 0 | -0.510327 | 3.875326  | 3.460851  |
| 43 | 1  | 0 | 0.948667  | 4.533701  | 2.712825  |
| 44 | 6  | 0 | -2.416551 | -0.399363 | 1.469244  |

|    |   |   |           |           |           |
|----|---|---|-----------|-----------|-----------|
| 45 | 6 | 0 | -3.781042 | -0.168269 | 1.656443  |
| 46 | 6 | 0 | -1.525239 | -0.168837 | 2.520497  |
| 47 | 6 | 0 | -4.250487 | 0.299695  | 2.879874  |
| 48 | 1 | 0 | -4.479288 | -0.355478 | 0.844971  |
| 49 | 6 | 0 | -1.995263 | 0.301918  | 3.742975  |
| 50 | 1 | 0 | -0.467071 | -0.353666 | 2.365415  |
| 51 | 6 | 0 | -3.356445 | 0.539000  | 3.922083  |
| 52 | 1 | 0 | -5.311953 | 0.476832  | 3.022042  |
| 53 | 1 | 0 | -1.298083 | 0.481774  | 4.555548  |
| 54 | 1 | 0 | -3.723536 | 0.905819  | 4.876025  |
| 55 | 6 | 0 | -2.918531 | -2.034409 | -0.863803 |
| 56 | 6 | 0 | -3.155579 | -3.265745 | -0.245098 |
| 57 | 6 | 0 | -3.597572 | -1.705538 | -2.037951 |
| 58 | 6 | 0 | -4.064994 | -4.159296 | -0.798082 |
| 59 | 1 | 0 | -2.626043 | -3.522626 | 0.667968  |
| 60 | 6 | 0 | -4.510403 | -2.601663 | -2.589022 |
| 61 | 1 | 0 | -3.399752 | -0.747802 | -2.508852 |
| 62 | 6 | 0 | -4.743570 | -3.826168 | -1.969720 |
| 63 | 1 | 0 | -4.245005 | -5.116180 | -0.318370 |
| 64 | 1 | 0 | -5.037352 | -2.345161 | -3.502933 |
| 65 | 1 | 0 | -5.455136 | -4.524826 | -2.399432 |

-----

$\omega$ B97XD/6-31G(d,p)-LANL2DZ energy= -2311.59396337  
 $\omega$ B97XD/6-311++G(d,p)-LANL2TZ(f)/SMD energy= -2311.94860142  
Zero-point correction= 0.534753 (Hartree/Particle)  
Thermal correction to Energy= 0.569895  
Thermal correction to Enthalpy= 0.570839  
Thermal correction to Gibbs Free Energy= 0.463136

## TS2

-----

| Center<br>Number | Atomic<br>Number | Atomic<br>Type | Coordinates (Angstroms) |           |           |
|------------------|------------------|----------------|-------------------------|-----------|-----------|
|                  |                  |                | X                       | Y         | Z         |
| 1                | 46               | 0              | -0.704106               | -0.532930 | 0.538506  |
| 2                | 6                | 0              | -2.445086               | -1.034278 | -0.178265 |
| 3                | 6                | 0              | -3.612336               | -1.217516 | -0.492123 |
| 4                | 1                | 0              | 0.668432                | -2.328050 | -0.805920 |
| 5                | 15               | 0              | 2.334318                | -1.094875 | -0.274602 |
| 6                | 8                | 0              | 1.640536                | -2.408148 | -0.886556 |
| 7                | 8                | 0              | 1.572025                | -0.475677 | 0.872614  |
| 8                | 6                | 0              | -0.545900               | 2.552807  | 2.592526  |
| 9                | 1                | 0              | -0.945603               | 3.008036  | 3.507908  |
| 10               | 1                | 0              | 0.524980                | 2.388646  | 2.759381  |

|    |    |   |           |           |           |
|----|----|---|-----------|-----------|-----------|
| 11 | 6  | 0 | -0.755502 | 3.508706  | 1.411054  |
| 12 | 1  | 0 | -0.288907 | 4.472998  | 1.651497  |
| 13 | 1  | 0 | -1.825465 | 3.703251  | 1.271751  |
| 14 | 15 | 0 | -1.310205 | 0.877729  | 2.390861  |
| 15 | 15 | 0 | -0.080723 | 2.894954  | -0.220755 |
| 16 | 6  | 0 | -1.080408 | 0.191823  | 4.081305  |
| 17 | 1  | 0 | -1.466498 | 0.864639  | 4.854042  |
| 18 | 1  | 0 | -1.597462 | -0.768401 | 4.148231  |
| 19 | 1  | 0 | -0.015740 | 0.014827  | 4.254116  |
| 20 | 6  | 0 | -3.103295 | 1.260650  | 2.355938  |
| 21 | 1  | 0 | -3.657992 | 0.319384  | 2.365382  |
| 22 | 1  | 0 | -3.412688 | 1.888713  | 3.197425  |
| 23 | 1  | 0 | -3.340972 | 1.757320  | 1.412282  |
| 24 | 6  | 0 | 1.720462  | 2.867135  | 0.200223  |
| 25 | 1  | 0 | 2.299261  | 2.831069  | -0.727332 |
| 26 | 1  | 0 | 2.027535  | 3.749001  | 0.774754  |
| 27 | 1  | 0 | 1.941889  | 1.956743  | 0.763613  |
| 28 | 6  | 0 | -0.141368 | 4.495175  | -1.156355 |
| 29 | 1  | 0 | 0.347322  | 5.318801  | -0.623435 |
| 30 | 1  | 0 | 0.358025  | 4.357018  | -2.120099 |
| 31 | 1  | 0 | -1.181345 | 4.769814  | -1.354902 |
| 32 | 6  | 0 | -4.990545 | -1.385790 | -0.828301 |
| 33 | 6  | 0 | -5.665131 | -2.581719 | -0.533313 |
| 34 | 6  | 0 | -5.703276 | -0.351988 | -1.458355 |
| 35 | 6  | 0 | -7.007768 | -2.734619 | -0.856917 |
| 36 | 1  | 0 | -5.121582 | -3.385929 | -0.048120 |
| 37 | 6  | 0 | -7.045268 | -0.512278 | -1.780390 |
| 38 | 1  | 0 | -5.188227 | 0.575158  | -1.688295 |
| 39 | 6  | 0 | -7.704517 | -1.702602 | -1.481689 |
| 40 | 1  | 0 | -7.513036 | -3.666694 | -0.621806 |
| 41 | 1  | 0 | -7.579949 | 0.298224  | -2.266994 |
| 42 | 1  | 0 | -8.753573 | -1.825637 | -1.732254 |
| 43 | 1  | 0 | -1.113269 | -1.496984 | -0.704332 |
| 44 | 6  | 0 | 2.550399  | 0.062670  | -1.645087 |
| 45 | 6  | 0 | 3.791262  | 0.646232  | -1.912941 |
| 46 | 6  | 0 | 1.423529  | 0.460878  | -2.373062 |
| 47 | 6  | 0 | 3.904041  | 1.623265  | -2.897899 |
| 48 | 1  | 0 | 4.669311  | 0.345540  | -1.349653 |
| 49 | 6  | 0 | 1.540789  | 1.437950  | -3.354893 |
| 50 | 1  | 0 | 0.450162  | 0.030427  | -2.155222 |
| 51 | 6  | 0 | 2.779193  | 2.020963  | -3.615944 |
| 52 | 1  | 0 | 4.869090  | 2.076332  | -3.100188 |
| 53 | 1  | 0 | 0.660720  | 1.747952  | -3.908663 |
| 54 | 1  | 0 | 2.867393  | 2.785340  | -4.381765 |

|    |   |   |          |           |           |
|----|---|---|----------|-----------|-----------|
| 55 | 6 | 0 | 3.957172 | -1.676239 | 0.231892  |
| 56 | 6 | 0 | 4.463840 | -1.236956 | 1.456448  |
| 57 | 6 | 0 | 4.718094 | -2.521046 | -0.582609 |
| 58 | 6 | 0 | 5.731285 | -1.641390 | 1.865239  |
| 59 | 1 | 0 | 3.855283 | -0.591582 | 2.081825  |
| 60 | 6 | 0 | 5.982352 | -2.922893 | -0.168118 |
| 61 | 1 | 0 | 4.318290 | -2.867944 | -1.530504 |
| 62 | 6 | 0 | 6.488775 | -2.480625 | 1.053301  |
| 63 | 1 | 0 | 6.126616 | -1.302621 | 2.817349  |
| 64 | 1 | 0 | 6.573573 | -3.581591 | -0.795785 |
| 65 | 1 | 0 | 7.477191 | -2.795420 | 1.373445  |

-----

$\omega$ B97XD/6-31G(d,p)-LANL2DZ energy= -2311.51928128  
 $\omega$ B97XD/6-311++G(d,p)-LANL2TZ(f)/SMD energy= -2311.87694269  
Zero-point correction= 0.526466 (Hartree/Particle)  
Thermal correction to Energy= 0.562796  
Thermal correction to Enthalpy= 0.563740  
Thermal correction to Gibbs Free Energy= 0.453195

**INT4**

-----

| Center<br>Number | Atomic<br>Number | Atomic<br>Type | Coordinates (Angstroms) |           |           |
|------------------|------------------|----------------|-------------------------|-----------|-----------|
|                  |                  |                | X                       | Y         | Z         |
| 1                | 46               | 0              | 0.836489                | -0.715083 | -0.132433 |
| 2                | 6                | 0              | 2.715244                | -0.901868 | 0.283174  |
| 3                | 6                | 0              | 3.922370                | -0.963028 | 0.450084  |
| 4                | 1                | 0              | -0.771842               | -2.596588 | 1.082283  |
| 5                | 15               | 0              | -2.266886               | -1.273574 | 0.357454  |
| 6                | 8                | 0              | -1.749088               | -2.654257 | 0.976791  |
| 7                | 8                | 0              | -1.305173               | -0.643370 | -0.630705 |
| 8                | 6                | 0              | 0.140956                | 1.916408  | -2.592680 |
| 9                | 1                | 0              | 0.422062                | 2.122031  | -3.632593 |
| 10               | 1                | 0              | -0.774386               | 1.314592  | -2.617943 |
| 11               | 6                | 0              | -0.106340               | 3.244914  | -1.865901 |
| 12               | 1                | 0              | -0.866810               | 3.815564  | -2.414957 |
| 13               | 1                | 0              | 0.807989                | 3.849735  | -1.881461 |
| 14               | 15               | 0              | 1.445631                | 0.830710  | -1.845918 |
| 15               | 15               | 0              | -0.625846               | 3.087672  | -0.079329 |
| 16               | 6                | 0              | 2.098774                | -0.071143 | -3.302776 |
| 17               | 1                | 0              | 2.458264                | 0.611082  | -4.079316 |
| 18               | 1                | 0              | 2.918956                | -0.707546 | -2.961481 |
| 19               | 1                | 0              | 1.316556                | -0.713851 | -3.714315 |
| 20               | 6                | 0              | 2.817318                | 1.969863  | -1.434794 |

|    |   |   |           |           |           |
|----|---|---|-----------|-----------|-----------|
| 21 | 1 | 0 | 3.663867  | 1.356054  | -1.118430 |
| 22 | 1 | 0 | 3.100507  | 2.595278  | -2.286953 |
| 23 | 1 | 0 | 2.525328  | 2.598184  | -0.590187 |
| 24 | 6 | 0 | -2.392231 | 2.602927  | -0.329996 |
| 25 | 1 | 0 | -2.909237 | 2.588142  | 0.633736  |
| 26 | 1 | 0 | -2.915428 | 3.284314  | -1.010445 |
| 27 | 1 | 0 | -2.416603 | 1.588675  | -0.735008 |
| 28 | 6 | 0 | -0.858342 | 4.890887  | 0.283147  |
| 29 | 1 | 0 | -1.473757 | 5.395215  | -0.470451 |
| 30 | 1 | 0 | -1.341174 | 5.001267  | 1.258356  |
| 31 | 1 | 0 | 0.114403  | 5.388103  | 0.335501  |
| 32 | 6 | 0 | 5.340805  | -1.021623 | 0.632732  |
| 33 | 6 | 0 | 6.041109  | -2.223464 | 0.442958  |
| 34 | 6 | 0 | 6.066320  | 0.125187  | 0.993928  |
| 35 | 6 | 0 | 7.420047  | -2.273421 | 0.607858  |
| 36 | 1 | 0 | 5.486973  | -3.114650 | 0.166916  |
| 37 | 6 | 0 | 7.445330  | 0.069006  | 1.159107  |
| 38 | 1 | 0 | 5.532268  | 1.057741  | 1.147602  |
| 39 | 6 | 0 | 8.129066  | -1.129053 | 0.966261  |
| 40 | 1 | 0 | 7.943785  | -3.212838 | 0.457566  |
| 41 | 1 | 0 | 7.988946  | 0.966261  | 1.440358  |
| 42 | 1 | 0 | 9.205972  | -1.171803 | 1.096933  |
| 43 | 1 | 0 | 0.702755  | -1.792443 | 1.043738  |
| 44 | 6 | 0 | -2.624032 | -0.137733 | 1.716591  |
| 45 | 6 | 0 | -3.935438 | 0.176578  | 2.082723  |
| 46 | 6 | 0 | -1.552085 | 0.497398  | 2.355153  |
| 47 | 6 | 0 | -4.173195 | 1.122703  | 3.075479  |
| 48 | 1 | 0 | -4.773193 | -0.301860 | 1.585396  |
| 49 | 6 | 0 | -1.796177 | 1.441248  | 3.345738  |
| 50 | 1 | 0 | -0.528528 | 0.274491  | 2.064749  |
| 51 | 6 | 0 | -3.105091 | 1.757003  | 3.703982  |
| 52 | 1 | 0 | -5.193732 | 1.366885  | 3.352147  |
| 53 | 1 | 0 | -0.959975 | 1.935927  | 3.828409  |
| 54 | 1 | 0 | -3.292737 | 2.499310  | 4.473617  |
| 55 | 6 | 0 | -3.812292 | -1.719480 | -0.440248 |
| 56 | 6 | 0 | -4.166015 | -1.046357 | -1.611843 |
| 57 | 6 | 0 | -4.664755 | -2.688468 | 0.098307  |
| 58 | 6 | 0 | -5.372728 | -1.336161 | -2.239608 |
| 59 | 1 | 0 | -3.487313 | -0.311240 | -2.032359 |
| 60 | 6 | 0 | -5.870303 | -2.973069 | -0.533726 |
| 61 | 1 | 0 | -4.380311 | -3.220906 | 1.000432  |
| 62 | 6 | 0 | -6.224489 | -2.295521 | -1.698891 |
| 63 | 1 | 0 | -5.645678 | -0.817497 | -3.152748 |
| 64 | 1 | 0 | -6.532292 | -3.726986 | -0.120463 |



65 1 0 -7.166479 -2.520370 -2.189084

-----  
ωB97XD/6-31G(d,p)-LANL2DZ energy= -2311.52882810  
ωB97XD/6-311++G(d,p)-LANL2TZ(f)/SMD energy= -2311.88965807  
Zero-point correction= 0.528882 (Hartree/Particle)  
Thermal correction to Energy= 0.565003  
Thermal correction to Enthalpy= 0.565947  
Thermal correction to Gibbs Free Energy= 0.456047

## INT6

-----

| Center<br>Number | Atomic<br>Number | Atomic<br>Type | Coordinates (Angstroms) |           |           |
|------------------|------------------|----------------|-------------------------|-----------|-----------|
|                  |                  |                | X                       | Y         | Z         |
| 1                | 46               | 0              | -1.800532               | 0.853327  | -0.483676 |
| 2                | 6                | 0              | -1.104644               | 1.882368  | -2.135959 |
| 3                | 6                | 0              | -0.478315               | 2.344526  | -1.132392 |
| 4                | 1                | 0              | 0.636016                | 0.724430  | 0.126424  |
| 5                | 15               | 0              | 1.999293                | -0.719512 | -0.747745 |
| 6                | 8                | 0              | 1.517830                | 0.360458  | 0.349641  |
| 7                | 8                | 0              | 1.806360                | -0.378498 | -2.180314 |
| 8                | 6                | 0              | -3.802751               | -1.586100 | 0.749377  |
| 9                | 1                | 0              | -4.787298               | -2.063837 | 0.814595  |
| 10               | 1                | 0              | -3.050313               | -2.382283 | 0.697211  |
| 11               | 6                | 0              | -3.539069               | -0.696641 | 1.973332  |
| 12               | 1                | 0              | -3.541728               | -1.287026 | 2.896666  |
| 13               | 1                | 0              | -4.330191               | 0.056828  | 2.069002  |
| 14               | 15               | 0              | -3.642461               | -0.597249 | -0.818335 |
| 15               | 15               | 0              | -1.927496               | 0.220068  | 1.790374  |
| 16               | 6                | 0              | -3.851982               | -1.871120 | -2.129165 |
| 17               | 1                | 0              | -4.682733               | -2.552266 | -1.918211 |
| 18               | 1                | 0              | -4.040472               | -1.363540 | -3.078875 |
| 19               | 1                | 0              | -2.929650               | -2.443811 | -2.241058 |
| 20               | 6                | 0              | -5.278010               | 0.247190  | -0.893784 |
| 21               | 1                | 0              | -5.351377               | 0.795413  | -1.836280 |
| 22               | 1                | 0              | -6.110246               | -0.460881 | -0.822112 |
| 23               | 1                | 0              | -5.348861               | 0.975282  | -0.082068 |
| 24               | 6                | 0              | -0.735162               | -1.006795 | 2.461568  |
| 25               | 1                | 0              | 0.279170                | -0.612953 | 2.368741  |
| 26               | 1                | 0              | -0.950099               | -1.242967 | 3.508815  |
| 27               | 1                | 0              | -0.787237               | -1.922049 | 1.866406  |
| 28               | 6                | 0              | -2.017040               | 1.445826  | 3.157600  |
| 29               | 1                | 0              | -2.253735               | 0.977545  | 4.118464  |
| 30               | 1                | 0              | -1.051388               | 1.952728  | 3.235348  |

|    |   |   |           |           |           |
|----|---|---|-----------|-----------|-----------|
| 31 | 1 | 0 | -2.775228 | 2.196740  | 2.921809  |
| 32 | 6 | 0 | 0.524659  | 3.220023  | -0.551330 |
| 33 | 6 | 0 | 0.295669  | 3.854297  | 0.674841  |
| 34 | 6 | 0 | 1.754496  | 3.406785  | -1.196208 |
| 35 | 6 | 0 | 1.264076  | 4.680378  | 1.233054  |
| 36 | 1 | 0 | -0.653668 | 3.688540  | 1.176136  |
| 37 | 6 | 0 | 2.725305  | 4.222972  | -0.627587 |
| 38 | 1 | 0 | 1.943719  | 2.880826  | -2.126175 |
| 39 | 6 | 0 | 2.483020  | 4.866018  | 0.584474  |
| 40 | 1 | 0 | 1.071520  | 5.175194  | 2.180470  |
| 41 | 1 | 0 | 3.678764  | 4.353280  | -1.130356 |
| 42 | 1 | 0 | 3.243287  | 5.504138  | 1.024462  |
| 43 | 1 | 0 | -1.294833 | 1.902811  | -3.193461 |
| 44 | 6 | 0 | 1.112655  | -2.240405 | -0.285141 |
| 45 | 6 | 0 | -0.098252 | -2.516555 | -0.927275 |
| 46 | 6 | 0 | 1.570791  | -3.095904 | 0.719753  |
| 47 | 6 | 0 | -0.842852 | -3.632706 | -0.554688 |
| 48 | 1 | 0 | -0.443620 | -1.850652 | -1.713438 |
| 49 | 6 | 0 | 0.823648  | -4.210189 | 1.090201  |
| 50 | 1 | 0 | 2.516724  | -2.894684 | 1.213471  |
| 51 | 6 | 0 | -0.386815 | -4.476878 | 0.455862  |
| 52 | 1 | 0 | -1.778553 | -3.857083 | -1.057515 |
| 53 | 1 | 0 | 1.187472  | -4.871877 | 1.869903  |
| 54 | 1 | 0 | -0.969151 | -5.348233 | 0.739818  |
| 55 | 6 | 0 | 3.722086  | -0.942368 | -0.252267 |
| 56 | 6 | 0 | 4.619541  | -1.406192 | -1.217101 |
| 57 | 6 | 0 | 4.170473  | -0.683897 | 1.046517  |
| 58 | 6 | 0 | 5.952400  | -1.623259 | -0.882794 |
| 59 | 1 | 0 | 4.267982  | -1.577391 | -2.230018 |
| 60 | 6 | 0 | 5.503813  | -0.903548 | 1.377535  |
| 61 | 1 | 0 | 3.477617  | -0.298304 | 1.787356  |
| 62 | 6 | 0 | 6.393061  | -1.375972 | 0.414914  |
| 63 | 1 | 0 | 6.648896  | -1.979054 | -1.635306 |
| 64 | 1 | 0 | 5.851554  | -0.699732 | 2.385458  |
| 65 | 1 | 0 | 7.433760  | -1.544557 | 0.674369  |

-----

|                                                     |                             |
|-----------------------------------------------------|-----------------------------|
| $\omega$ B97XD/6-31G(d)- LANL2DZ energy=            | -2311.58645670              |
| $\omega$ B97XD/6-311++G(d,p)-LANL2TZ(f)/SMD energy= | -2311.94506718              |
| Zero-point correction=                              | 0.531688 (Hartree/Particle) |
| Thermal correction to Energy=                       | 0.567790                    |
| Thermal correction to Enthalpy=                     | 0.568734                    |
| Thermal correction to Gibbs Free Energy=            | 0.460915                    |

**TS4**

| Center<br>Number | Atomic<br>Number | Atomic<br>Type | Coordinates (Angstroms) |           |           |
|------------------|------------------|----------------|-------------------------|-----------|-----------|
|                  |                  |                | X                       | Y         | Z         |
| 1                | 46               | 0              | -1.000518               | -0.227514 | -0.652328 |
| 2                | 6                | 0              | -1.225880               | 1.388080  | -2.567194 |
| 3                | 6                | 0              | -1.667913               | 2.034703  | -1.636511 |
| 4                | 1                | 0              | -0.223270               | 0.775060  | 0.340693  |
| 5                | 15               | 0              | 1.968891                | 0.329233  | -0.216776 |
| 6                | 8                | 0              | 1.204375                | 1.291511  | 0.714322  |
| 7                | 8                | 0              | 1.303465                | -0.089499 | -1.518309 |
| 8                | 6                | 0              | -2.344252               | -3.119513 | 0.242636  |
| 9                | 1                | 0              | -3.023110               | -3.972128 | 0.122695  |
| 10               | 1                | 0              | -1.385122               | -3.511682 | 0.603948  |
| 11               | 6                | 0              | -2.908451               | -2.114316 | 1.256016  |
| 12               | 1                | 0              | -3.055205               | -2.585260 | 2.234635  |
| 13               | 1                | 0              | -3.886317               | -1.746671 | 0.922523  |
| 14               | 15               | 0              | -1.993729               | -2.324353 | -1.407465 |
| 15               | 15               | 0              | -1.801069               | -0.629422 | 1.413474  |
| 16               | 6                | 0              | -1.143073               | -3.703540 | -2.280722 |
| 17               | 1                | 0              | -1.719745               | -4.633503 | -2.244055 |
| 18               | 1                | 0              | -0.977527               | -3.426160 | -3.324648 |
| 19               | 1                | 0              | -0.165956               | -3.869473 | -1.819947 |
| 20               | 6                | 0              | -3.659311               | -2.355804 | -2.196971 |
| 21               | 1                | 0              | -3.579142               | -1.982373 | -3.221196 |
| 22               | 1                | 0              | -4.096319               | -3.359568 | -2.213249 |
| 23               | 1                | 0              | -4.325044               | -1.681923 | -1.651142 |
| 24               | 6                | 0              | -0.614573               | -1.101737 | 2.723863  |
| 25               | 1                | 0              | 0.119729                | -0.298398 | 2.819082  |
| 26               | 1                | 0              | -1.113883               | -1.275575 | 3.682045  |
| 27               | 1                | 0              | -0.073733               | -2.001945 | 2.419196  |
| 28               | 6                | 0              | -2.861530               | 0.614310  | 2.240316  |
| 29               | 1                | 0              | -3.318596               | 0.218883  | 3.152733  |
| 30               | 1                | 0              | -2.250045               | 1.486125  | 2.486329  |
| 31               | 1                | 0              | -3.638457               | 0.947357  | 1.548013  |
| 32               | 6                | 0              | -2.183479               | 2.880489  | -0.592019 |
| 33               | 6                | 0              | -3.551808               | 3.166337  | -0.522472 |
| 34               | 6                | 0              | -1.309979               | 3.410271  | 0.368753  |
| 35               | 6                | 0              | -4.044410               | 3.968086  | 0.502342  |
| 36               | 1                | 0              | -4.221287               | 2.754356  | -1.270795 |
| 37               | 6                | 0              | -1.812433               | 4.215673  | 1.382915  |
| 38               | 1                | 0              | -0.256719               | 3.147720  | 0.330235  |
| 39               | 6                | 0              | -3.176985               | 4.494022  | 1.455993  |
| 40               | 1                | 0              | -5.107253               | 4.182618  | 0.554823  |

|    |   |   |           |           |           |
|----|---|---|-----------|-----------|-----------|
| 41 | 1 | 0 | -1.133284 | 4.621407  | 2.126226  |
| 42 | 1 | 0 | -3.562355 | 5.121058  | 2.254027  |
| 43 | 1 | 0 | -0.794600 | 0.924485  | -3.425168 |
| 44 | 6 | 0 | 2.281434  | -1.199896 | 0.739743  |
| 45 | 6 | 0 | 1.826651  | -2.417408 | 0.229315  |
| 46 | 6 | 0 | 2.867196  | -1.169288 | 2.006831  |
| 47 | 6 | 0 | 1.932640  | -3.584781 | 0.981628  |
| 48 | 1 | 0 | 1.380267  | -2.419346 | -0.760737 |
| 49 | 6 | 0 | 2.983991  | -2.335152 | 2.757911  |
| 50 | 1 | 0 | 3.222450  | -0.225897 | 2.412670  |
| 51 | 6 | 0 | 2.509161  | -3.543283 | 2.249730  |
| 52 | 1 | 0 | 1.572781  | -4.527383 | 0.577679  |
| 53 | 1 | 0 | 3.440534  | -2.302517 | 3.742533  |
| 54 | 1 | 0 | 2.595855  | -4.451991 | 2.838040  |
| 55 | 6 | 0 | 3.597110  | 1.064012  | -0.532089 |
| 56 | 6 | 0 | 4.353985  | 0.649861  | -1.631140 |
| 57 | 6 | 0 | 4.110811  | 2.034408  | 0.331689  |
| 58 | 6 | 0 | 5.613508  | 1.195589  | -1.858274 |
| 59 | 1 | 0 | 3.942049  | -0.088921 | -2.311992 |
| 60 | 6 | 0 | 5.371850  | 2.577949  | 0.105141  |
| 61 | 1 | 0 | 3.504014  | 2.369947  | 1.167115  |
| 62 | 6 | 0 | 6.124237  | 2.157014  | -0.988444 |
| 63 | 1 | 0 | 6.196265  | 0.875060  | -2.716645 |
| 64 | 1 | 0 | 5.764880  | 3.334299  | 0.777939  |
| 65 | 1 | 0 | 7.106882  | 2.583497  | -1.167035 |

-----

$\omega$ B97XD/6-31G(d)- LANL2DZ energy= -2311.53939306  
 $\omega$ B97XD/6-311++G(d,p)-LANL2TZ(f)/SMD energy= -2311.89702051  
Zero-point correction= 0.525839 (Hartree/Particle)  
Thermal correction to Energy= 0.561584  
Thermal correction to Enthalpy= 0.562528  
Thermal correction to Gibbs Free Energy= 0.455866

## INT7

-----

| Center<br>Number | Atomic<br>Number | Atomic<br>Type | Coordinates (Angstroms) |           |           |
|------------------|------------------|----------------|-------------------------|-----------|-----------|
|                  |                  |                | X                       | Y         | Z         |
| 1                | 46               | 0              | -0.758528               | 0.223431  | 0.079527  |
| 2                | 6                | 0              | -5.215322               | -1.878559 | 0.646185  |
| 3                | 6                | 0              | -4.240853               | -2.136092 | -0.023094 |
| 4                | 1                | 0              | -0.529196               | 0.312171  | -1.467877 |
| 5                | 15               | 0              | 2.210365                | -0.679427 | -0.584349 |
| 6                | 8                | 0              | 2.175165                | -1.591816 | -1.773496 |

|    |    |   |           |           |           |
|----|----|---|-----------|-----------|-----------|
| 7  | 8  | 0 | 1.096583  | -0.722180 | 0.495613  |
| 8  | 6  | 0 | -2.647020 | 1.712523  | 2.434261  |
| 9  | 1  | 0 | -3.253670 | 1.660813  | 3.344668  |
| 10 | 1  | 0 | -2.095354 | 2.659590  | 2.465016  |
| 11 | 6  | 0 | -3.531399 | 1.655924  | 1.180231  |
| 12 | 1  | 0 | -4.204247 | 2.519084  | 1.126999  |
| 13 | 1  | 0 | -4.152301 | 0.751480  | 1.193196  |
| 14 | 15 | 0 | -1.382133 | 0.352504  | 2.386446  |
| 15 | 15 | 0 | -2.507215 | 1.534483  | -0.363269 |
| 16 | 6  | 0 | -0.143245 | 0.823941  | 3.647600  |
| 17 | 1  | 0 | -0.585317 | 0.952184  | 4.639880  |
| 18 | 1  | 0 | 0.617540  | 0.040276  | 3.682804  |
| 19 | 1  | 0 | 0.345794  | 1.752198  | 3.342115  |
| 20 | 6  | 0 | -2.247966 | -1.072732 | 3.146959  |
| 21 | 1  | 0 | -1.550772 | -1.912251 | 3.211303  |
| 22 | 1  | 0 | -2.618640 | -0.836607 | 4.149108  |
| 23 | 1  | 0 | -3.082912 | -1.371795 | 2.506641  |
| 24 | 6  | 0 | -1.974215 | 3.249938  | -0.712542 |
| 25 | 1  | 0 | -1.399187 | 3.251056  | -1.641359 |
| 26 | 1  | 0 | -2.825877 | 3.931820  | -0.797668 |
| 27 | 1  | 0 | -1.304828 | 3.588058  | 0.081703  |
| 28 | 6  | 0 | -3.738525 | 1.174282  | -1.659616 |
| 29 | 1  | 0 | -4.469214 | 1.985107  | -1.734957 |
| 30 | 1  | 0 | -3.226297 | 1.044009  | -2.614542 |
| 31 | 1  | 0 | -4.251269 | 0.243133  | -1.410533 |
| 32 | 6  | 0 | -3.079334 | -2.390485 | -0.824841 |
| 33 | 6  | 0 | -3.136336 | -2.232970 | -2.216203 |
| 34 | 6  | 0 | -1.863260 | -2.740502 | -0.220471 |
| 35 | 6  | 0 | -1.984627 | -2.383634 | -2.980235 |
| 36 | 1  | 0 | -4.081823 | -1.980814 | -2.686512 |
| 37 | 6  | 0 | -0.717923 | -2.884809 | -0.991790 |
| 38 | 1  | 0 | -1.817393 | -2.871939 | 0.855340  |
| 39 | 6  | 0 | -0.771506 | -2.688646 | -2.369297 |
| 40 | 1  | 0 | -2.033243 | -2.241559 | -4.055408 |
| 41 | 1  | 0 | 0.236989  | -3.080890 | -0.521195 |
| 42 | 1  | 0 | 0.152188  | -2.734975 | -2.934593 |
| 43 | 1  | 0 | -6.095593 | -1.706430 | 1.221946  |
| 44 | 6  | 0 | 2.278535  | 1.064979  | -1.137806 |
| 45 | 6  | 0 | 2.077613  | 2.115589  | -0.236796 |
| 46 | 6  | 0 | 2.468013  | 1.354497  | -2.488179 |
| 47 | 6  | 0 | 2.056969  | 3.433640  | -0.679812 |
| 48 | 1  | 0 | 1.918411  | 1.890759  | 0.814642  |
| 49 | 6  | 0 | 2.444400  | 2.673893  | -2.936507 |
| 50 | 1  | 0 | 2.609648  | 0.530101  | -3.180543 |

|    |   |   |          |           |           |
|----|---|---|----------|-----------|-----------|
| 51 | 6 | 0 | 2.237097 | 3.713896  | -2.034153 |
| 52 | 1 | 0 | 1.904375 | 4.244037  | 0.028058  |
| 53 | 1 | 0 | 2.588186 | 2.890278  | -3.991113 |
| 54 | 1 | 0 | 2.221432 | 4.742432  | -2.383467 |
| 55 | 6 | 0 | 3.751740 | -0.926170 | 0.359538  |
| 56 | 6 | 0 | 3.873399 | -0.495498 | 1.683670  |
| 57 | 6 | 0 | 4.841560 | -1.539871 | -0.260930 |
| 58 | 6 | 0 | 5.069757 | -0.664777 | 2.373097  |
| 59 | 1 | 0 | 3.016322 | -0.040467 | 2.171521  |
| 60 | 6 | 0 | 6.038861 | -1.712626 | 0.428074  |
| 61 | 1 | 0 | 4.729668 | -1.890858 | -1.282358 |
| 62 | 6 | 0 | 6.155188 | -1.271320 | 1.743763  |
| 63 | 1 | 0 | 5.158065 | -0.328312 | 3.402253  |
| 64 | 1 | 0 | 6.881818 | -2.193276 | -0.059606 |
| 65 | 1 | 0 | 7.090153 | -1.404105 | 2.280331  |

-----

$\omega$ B97XD/6-31G(d)- LANL2DZ energy= -2311.55942582  
 $\omega$ B97XD/6-311++G(d,p)-LANL2TZ(f)/SMD energy= -2311.92658597  
Zero-point correction= 0.527952 (Hartree/Particle)  
Thermal correction to Energy= 0.563460  
Thermal correction to Enthalpy= 0.564404  
Thermal correction to Gibbs Free Energy= 0.458229

## INT8

-----

| Center<br>Number | Atomic<br>Number | Atomic<br>Type | Coordinates (Angstroms) |           |           |
|------------------|------------------|----------------|-------------------------|-----------|-----------|
|                  |                  |                | X                       | Y         | Z         |
| 1                | 46               | 0              | 1.147377                | -0.839137 | -0.604839 |
| 2                | 1                | 0              | -0.630604               | 0.393063  | -1.914617 |
| 3                | 15               | 0              | -1.835077               | -0.367179 | -0.362862 |
| 4                | 8                | 0              | -1.606248               | 0.361787  | -1.782541 |
| 5                | 8                | 0              | -1.127249               | -1.670254 | -0.134344 |
| 6                | 6                | 0              | 4.196625                | -0.029789 | 0.191988  |
| 7                | 1                | 0              | 4.973186                | 0.129895  | 0.950627  |
| 8                | 1                | 0              | 4.697410                | -0.419641 | -0.702848 |
| 9                | 6                | 0              | 3.490883                | 1.290752  | -0.139164 |
| 10               | 1                | 0              | 4.210914                | 2.031568  | -0.509397 |
| 11               | 1                | 0              | 3.034967                | 1.709757  | 0.766292  |
| 12               | 15               | 0              | 3.002940                | -1.354783 | 0.754940  |
| 13               | 15               | 0              | 2.103096                | 1.076251  | -1.374768 |
| 14               | 6                | 0              | 4.184689                | -2.766649 | 0.937665  |
| 15               | 1                | 0              | 5.068417                | -2.496394 | 1.526850  |
| 16               | 1                | 0              | 3.674500                | -3.602059 | 1.424552  |

|    |   |   |           |           |           |
|----|---|---|-----------|-----------|-----------|
| 17 | 1 | 0 | 4.504786  | -3.101560 | -0.052674 |
| 18 | 6 | 0 | 2.798466  | -0.875259 | 2.529383  |
| 19 | 1 | 0 | 2.202126  | -1.634405 | 3.042920  |
| 20 | 1 | 0 | 3.759851  | -0.765252 | 3.043569  |
| 21 | 1 | 0 | 2.251059  | 0.069729  | 2.579676  |
| 22 | 6 | 0 | 3.050129  | 1.065752  | -2.960402 |
| 23 | 1 | 0 | 3.753005  | 1.903596  | -3.026073 |
| 24 | 1 | 0 | 3.599892  | 0.124899  | -3.042904 |
| 25 | 1 | 0 | 2.352079  | 1.116298  | -3.800113 |
| 26 | 6 | 0 | 1.451075  | 2.806353  | -1.381837 |
| 27 | 1 | 0 | 2.242855  | 3.549833  | -1.527536 |
| 28 | 1 | 0 | 0.710084  | 2.915048  | -2.179126 |
| 29 | 1 | 0 | 0.948104  | 2.995787  | -0.429337 |
| 30 | 6 | 0 | -3.628732 | -0.547482 | -0.339178 |
| 31 | 6 | 0 | -4.486972 | 0.438695  | -0.834891 |
| 32 | 6 | 0 | -4.156842 | -1.709120 | 0.227856  |
| 33 | 6 | 0 | -5.863555 | 0.262102  | -0.758492 |
| 34 | 1 | 0 | -4.079506 | 1.333133  | -1.295287 |
| 35 | 6 | 0 | -5.535725 | -1.881676 | 0.302614  |
| 36 | 1 | 0 | -3.478974 | -2.474903 | 0.591572  |
| 37 | 6 | 0 | -6.387734 | -0.896279 | -0.187438 |
| 38 | 1 | 0 | -6.529768 | 1.025311  | -1.148047 |
| 39 | 1 | 0 | -5.944646 | -2.786996 | 0.739635  |
| 40 | 1 | 0 | -7.463260 | -1.031711 | -0.128074 |
| 41 | 6 | 0 | -1.360107 | 0.862198  | 0.881445  |
| 42 | 6 | 0 | -1.586614 | 2.226734  | 0.685842  |
| 43 | 6 | 0 | -0.731365 | 0.423641  | 2.049836  |
| 44 | 6 | 0 | -1.184286 | 3.146046  | 1.649508  |
| 45 | 1 | 0 | -2.053921 | 2.572575  | -0.231183 |
| 46 | 6 | 0 | -0.329918 | 1.345414  | 3.011786  |
| 47 | 1 | 0 | -0.538695 | -0.636818 | 2.179182  |
| 48 | 6 | 0 | -0.554366 | 2.705527  | 2.811878  |
| 49 | 1 | 0 | -1.356326 | 4.206060  | 1.491358  |
| 50 | 1 | 0 | 0.161414  | 1.001123  | 3.916655  |
| 51 | 1 | 0 | -0.238596 | 3.424002  | 3.561932  |

-----

|                                                     |                             |
|-----------------------------------------------------|-----------------------------|
| $\omega$ B97XD/6-31G(d)- LANL2DZ energy=            | -2003.25429671              |
| $\omega$ B97XD/6-311++G(d,p)-LANL2TZ(f)/SMD energy= | -2003.53559958              |
| Zero-point correction=                              | 0.418526 (Hartree/Particle) |
| Thermal correction to Energy=                       | 0.447169                    |
| Thermal correction to Enthalpy=                     | 0.448113                    |
| Thermal correction to Gibbs Free Energy=            | 0.356736                    |

**TS5**

| Center<br>Number | Atomic<br>Number | Atomic<br>Type | Coordinates (Angstroms) |           |           |
|------------------|------------------|----------------|-------------------------|-----------|-----------|
|                  |                  |                | X                       | Y         | Z         |
| 1                | 46               | 0              | 1.297049                | -0.146830 | -0.039642 |
| 2                | 1                | 0              | 0.241927                | -0.393998 | -1.289398 |
| 3                | 15               | 0              | -1.731054               | -0.092980 | -0.218121 |
| 4                | 8                | 0              | -1.162868               | -0.444163 | -1.605798 |
| 5                | 8                | 0              | -0.682925               | 0.052082  | 0.893457  |
| 6                | 6                | 0              | 4.588766                | -0.162569 | 0.709146  |
| 7                | 1                | 0              | 5.479452                | 0.292711  | 1.157513  |
| 8                | 1                | 0              | 4.688369                | -1.248143 | 0.830733  |
| 9                | 6                | 0              | 4.495950                | 0.189921  | -0.782284 |
| 10               | 1                | 0              | 5.367649                | -0.188501 | -1.328782 |
| 11               | 1                | 0              | 4.482930                | 1.278861  | -0.911157 |
| 12               | 15               | 0              | 3.056048                | 0.338500  | 1.647627  |
| 13               | 15               | 0              | 2.923915                | -0.452630 | -1.543746 |
| 14               | 6                | 0              | 3.412547                | -0.376335 | 3.307250  |
| 15               | 1                | 0              | 4.400598                | -0.089435 | 3.682084  |
| 16               | 1                | 0              | 2.651081                | -0.034654 | 4.012907  |
| 17               | 1                | 0              | 3.350823                | -1.466163 | 3.251577  |
| 18               | 6                | 0              | 3.376274                | 2.129442  | 1.942624  |
| 19               | 1                | 0              | 2.591129                | 2.529931  | 2.588902  |
| 20               | 1                | 0              | 4.351297                | 2.306523  | 2.408379  |
| 21               | 1                | 0              | 3.325561                | 2.665265  | 0.991287  |
| 22               | 6                | 0              | 3.356178                | -2.190111 | -1.953251 |
| 23               | 1                | 0              | 4.243996                | -2.247961 | -2.591270 |
| 24               | 1                | 0              | 3.535185                | -2.743565 | -1.028299 |
| 25               | 1                | 0              | 2.508902                | -2.655470 | -2.461763 |
| 26               | 6                | 0              | 2.924229                | 0.354226  | -3.189605 |
| 27               | 1                | 0              | 3.866099                | 0.190976  | -3.723159 |
| 28               | 1                | 0              | 2.095875                | -0.047122 | -3.777910 |
| 29               | 1                | 0              | 2.756223                | 1.426110  | -3.062847 |
| 30               | 6                | 0              | -2.941523               | -1.360667 | 0.248608  |
| 31               | 6                | 0              | -3.366151               | -2.308266 | -0.684337 |
| 32               | 6                | 0              | -3.464831               | -1.384755 | 1.544915  |
| 33               | 6                | 0              | -4.308078               | -3.269389 | -0.325649 |
| 34               | 1                | 0              | -2.943125               | -2.286726 | -1.683787 |
| 35               | 6                | 0              | -4.405542               | -2.343966 | 1.901268  |
| 36               | 1                | 0              | -3.126810               | -0.653734 | 2.273510  |
| 37               | 6                | 0              | -4.829354               | -3.285778 | 0.964828  |
| 38               | 1                | 0              | -4.634403               | -4.005888 | -1.053640 |
| 39               | 1                | 0              | -4.809860               | -2.360222 | 2.908816  |
| 40               | 1                | 0              | -5.565074               | -4.033976 | 1.244168  |



|    |   |   |           |          |           |
|----|---|---|-----------|----------|-----------|
| 41 | 6 | 0 | -2.669953 | 1.458933 | -0.312623 |
| 42 | 6 | 0 | -3.596846 | 1.669950 | -1.337464 |
| 43 | 6 | 0 | -2.471700 | 2.448453 | 0.651677  |
| 44 | 6 | 0 | -4.321363 | 2.855223 | -1.392626 |
| 45 | 1 | 0 | -3.743495 | 0.905002 | -2.094698 |
| 46 | 6 | 0 | -3.196015 | 3.636549 | 0.594232  |
| 47 | 1 | 0 | -1.740678 | 2.274989 | 1.435307  |
| 48 | 6 | 0 | -4.122275 | 3.838902 | -0.425007 |
| 49 | 1 | 0 | -5.041186 | 3.014571 | -2.189733 |
| 50 | 1 | 0 | -3.038186 | 4.404460 | 1.345720  |
| 51 | 1 | 0 | -4.687719 | 4.765057 | -0.468829 |

-----

ωB97XD/6-31G(d)- LANL2DZ energy= -2003.23433333  
ωB97XD/6-311++G(d,p)-LANL2TZ(f)/SMD energy= -2003.52431654  
Zero-point correction= 0.412490 (Hartree/Particle)  
Thermal correction to Energy= 0.440732  
Thermal correction to Enthalpy= 0.441676  
Thermal correction to Gibbs Free Energy= 0.348948

## INT9

-----

| Center<br>Number | Atomic<br>Number | Atomic<br>Type | Coordinates (Angstroms) |           |           |
|------------------|------------------|----------------|-------------------------|-----------|-----------|
|                  |                  |                | X                       | Y         | Z         |
| 1                | 46               | 0              | -1.396778               | 0.354060  | -0.658869 |
| 2                | 1                | 0              | -1.200371               | 1.876414  | -0.995527 |
| 3                | 15               | 0              | 1.445568                | 0.013568  | 0.226018  |
| 4                | 8                | 0              | 0.772947                | -0.205770 | 1.558181  |
| 5                | 8                | 0              | 0.622554                | -0.138896 | -1.080407 |
| 6                | 6                | 0              | -3.372878               | -1.626384 | 1.189799  |
| 7                | 1                | 0              | -3.905343               | -2.562430 | 1.389007  |
| 8                | 1                | 0              | -2.941535               | -1.284242 | 2.137240  |
| 9                | 6                | 0              | -4.325794               | -0.562926 | 0.622167  |
| 10               | 1                | 0              | -5.112107               | -0.304565 | 1.339872  |
| 11               | 1                | 0              | -4.821087               | -0.940653 | -0.280116 |
| 12               | 15               | 0              | -1.948603               | -1.887431 | 0.029052  |
| 13               | 15               | 0              | -3.390738               | 0.964606  | 0.128125  |
| 14               | 6                | 0              | -0.743902               | -2.893572 | 0.955163  |
| 15               | 1                | 0              | -1.211963               | -3.760908 | 1.429559  |
| 16               | 1                | 0              | 0.027552                | -3.229116 | 0.256613  |
| 17               | 1                | 0              | -0.253822               | -2.238306 | 1.680729  |
| 18               | 6                | 0              | -2.631951               | -3.044091 | -1.222978 |
| 19               | 1                | 0              | -1.852729               | -3.268177 | -1.955366 |
| 20               | 1                | 0              | -2.976565               | -3.977627 | -0.767728 |

|    |   |   |           |           |           |
|----|---|---|-----------|-----------|-----------|
| 21 | 1 | 0 | -3.463048 | -2.571049 | -1.752407 |
| 22 | 6 | 0 | -3.207146 | 1.890633  | 1.693331  |
| 23 | 1 | 0 | -4.173330 | 2.056294  | 2.179510  |
| 24 | 1 | 0 | -2.544021 | 1.330949  | 2.357123  |
| 25 | 1 | 0 | -2.727645 | 2.848385  | 1.481406  |
| 26 | 6 | 0 | -4.591808 | 1.938766  | -0.843347 |
| 27 | 1 | 0 | -5.530224 | 2.074229  | -0.297746 |
| 28 | 1 | 0 | -4.152082 | 2.914112  | -1.062182 |
| 29 | 1 | 0 | -4.788698 | 1.433439  | -1.791282 |
| 30 | 6 | 0 | 2.824362  | -1.164294 | 0.038560  |
| 31 | 6 | 0 | 3.252950  | -1.894914 | 1.148113  |
| 32 | 6 | 0 | 3.452266  | -1.357980 | -1.195183 |
| 33 | 6 | 0 | 4.297123  | -2.808951 | 1.028287  |
| 34 | 1 | 0 | 2.750276  | -1.741325 | 2.098413  |
| 35 | 6 | 0 | 4.496616  | -2.268706 | -1.315142 |
| 36 | 1 | 0 | 3.110034  | -0.799693 | -2.061379 |
| 37 | 6 | 0 | 4.920164  | -2.994566 | -0.202701 |
| 38 | 1 | 0 | 4.624886  | -3.375721 | 1.894889  |
| 39 | 1 | 0 | 4.980162  | -2.416358 | -2.276276 |
| 40 | 1 | 0 | 5.734244  | -3.707334 | -0.297428 |
| 41 | 6 | 0 | 2.200579  | 1.669078  | 0.163538  |
| 42 | 6 | 0 | 2.733449  | 2.240225  | 1.321393  |
| 43 | 6 | 0 | 2.261208  | 2.372753  | -1.041182 |
| 44 | 6 | 0 | 3.332454  | 3.495179  | 1.272503  |
| 45 | 1 | 0 | 2.661504  | 1.699199  | 2.260291  |
| 46 | 6 | 0 | 2.858339  | 3.629192  | -1.090122 |
| 47 | 1 | 0 | 1.820517  | 1.929119  | -1.928860 |
| 48 | 6 | 0 | 3.398121  | 4.188692  | 0.065645  |
| 49 | 1 | 0 | 3.746391  | 3.935372  | 2.174935  |
| 50 | 1 | 0 | 2.901441  | 4.172951  | -2.029313 |
| 51 | 1 | 0 | 3.867018  | 5.167646  | 0.026806  |

-----  
 $\omega$ B97XD/6-31G(d)- LANL2DZ energy= -2003.25554419  
 $\omega$ B97XD/6-311++G(d,p)-LANL2TZ(f)/SMD energy= -2003.55174509  
Zero-point correction= 0.416142 (Hartree/Particle)  
Thermal correction to Energy= 0.444274  
Thermal correction to Enthalpy= 0.445219  
Thermal correction to Gibbs Free Energy= 0.354653

#### INT10

-----  
Center Atomic Atomic Coordinates (Angstroms)  
Number Number Type X Y Z  
-----

|    |    |   |           |           |           |
|----|----|---|-----------|-----------|-----------|
| 1  | 46 | 0 | 0.458325  | 0.390007  | -0.539990 |
| 2  | 6  | 0 | 2.042300  | 2.446644  | -1.725129 |
| 3  | 6  | 0 | 2.128817  | 1.486907  | -0.795969 |
| 4  | 1  | 0 | 1.107166  | 2.662229  | -2.234589 |
| 5  | 15 | 0 | -2.685013 | -0.312018 | -1.200779 |
| 6  | 8  | 0 | -2.471796 | -0.358665 | -2.690559 |
| 7  | 8  | 0 | -1.479441 | -0.571188 | -0.264287 |
| 8  | 6  | 0 | -1.056211 | 0.827170  | 2.479005  |
| 9  | 1  | 0 | -1.600884 | 1.620032  | 3.005812  |
| 10 | 1  | 0 | -1.761950 | 0.310285  | 1.823759  |
| 11 | 6  | 0 | -0.444413 | -0.145759 | 3.494552  |
| 12 | 1  | 0 | -1.259053 | -0.585784 | 4.084456  |
| 13 | 1  | 0 | 0.190385  | 0.402569  | 4.201221  |
| 14 | 15 | 0 | 0.135011  | 1.642799  | 1.332212  |
| 15 | 15 | 0 | 0.615229  | -1.519891 | 2.799745  |
| 16 | 6  | 0 | -0.639630 | 3.242198  | 0.917124  |
| 17 | 1  | 0 | -0.817560 | 3.834578  | 1.819518  |
| 18 | 1  | 0 | 0.034225  | 3.782449  | 0.247859  |
| 19 | 1  | 0 | -1.585198 | 3.072742  | 0.401274  |
| 20 | 6  | 0 | 1.540167  | 2.134834  | 2.392181  |
| 21 | 1  | 0 | 2.191002  | 2.812738  | 1.837441  |
| 22 | 1  | 0 | 1.163739  | 2.638335  | 3.287889  |
| 23 | 1  | 0 | 2.126517  | 1.258035  | 2.672691  |
| 24 | 6  | 0 | -0.670992 | -2.625966 | 2.078171  |
| 25 | 1  | 0 | -0.210453 | -3.582440 | 1.813698  |
| 26 | 1  | 0 | -1.492474 | -2.817265 | 2.778973  |
| 27 | 1  | 0 | -1.060601 | -2.169153 | 1.163061  |
| 28 | 6  | 0 | 0.941063  | -2.397527 | 4.399835  |
| 29 | 1  | 0 | 0.017431  | -2.608888 | 4.950456  |
| 30 | 1  | 0 | 1.449129  | -3.344371 | 4.197201  |
| 31 | 1  | 0 | 1.598823  | -1.793084 | 5.031016  |
| 32 | 6  | 0 | 2.896498  | -1.514716 | -2.165940 |
| 33 | 6  | 0 | 3.965204  | -0.734173 | -2.621506 |
| 34 | 6  | 0 | 5.270816  | -1.135912 | -2.372594 |
| 35 | 6  | 0 | 5.518738  | -2.319094 | -1.681738 |
| 36 | 6  | 0 | 4.457367  | -3.106540 | -1.240263 |
| 37 | 6  | 0 | 3.148582  | -2.707560 | -1.477110 |
| 38 | 1  | 0 | 3.757239  | 0.198238  | -3.134232 |
| 39 | 1  | 0 | 6.096638  | -0.517427 | -2.707856 |
| 40 | 1  | 0 | 6.540858  | -2.625899 | -1.483784 |
| 41 | 1  | 0 | 4.650229  | -4.030514 | -0.704680 |
| 42 | 1  | 0 | 2.312655  | -3.301223 | -1.122060 |
| 43 | 6  | 0 | 1.544394  | -1.082764 | -2.373847 |
| 44 | 6  | 0 | 0.398490  | -0.747044 | -2.625423 |

|    |   |   |           |           |           |
|----|---|---|-----------|-----------|-----------|
| 45 | 1 | 0 | -0.639023 | -0.599239 | -2.928477 |
| 46 | 6 | 0 | 3.377210  | 1.171654  | -0.054726 |
| 47 | 6 | 0 | 3.502602  | -0.033194 | 0.646306  |
| 48 | 6 | 0 | 4.458400  | 2.064999  | -0.017022 |
| 49 | 6 | 0 | 4.671581  | -0.355219 | 1.325042  |
| 50 | 1 | 0 | 2.667607  | -0.725504 | 0.666422  |
| 51 | 6 | 0 | 5.628546  | 1.746560  | 0.662197  |
| 52 | 1 | 0 | 4.380398  | 3.028451  | -0.511176 |
| 53 | 6 | 0 | 5.744692  | 0.530532  | 1.331637  |
| 54 | 1 | 0 | 4.738828  | -1.304310 | 1.847724  |
| 55 | 1 | 0 | 6.450030  | 2.456810  | 0.675954  |
| 56 | 1 | 0 | 6.659553  | 0.283407  | 1.861499  |
| 57 | 1 | 0 | 2.904919  | 3.029784  | -2.046243 |
| 58 | 6 | 0 | -3.962304 | -1.496885 | -0.684297 |
| 59 | 6 | 0 | -4.060464 | -1.940887 | 0.637467  |
| 60 | 6 | 0 | -4.876056 | -1.962828 | -1.632289 |
| 61 | 6 | 0 | -5.065300 | -2.828092 | 1.009427  |
| 62 | 1 | 0 | -3.334897 | -1.603410 | 1.371556  |
| 63 | 6 | 0 | -5.879548 | -2.853095 | -1.261314 |
| 64 | 1 | 0 | -4.778964 | -1.630523 | -2.661293 |
| 65 | 6 | 0 | -5.977096 | -3.283299 | 0.059627  |
| 66 | 1 | 0 | -5.134190 | -3.171434 | 2.037402  |
| 67 | 1 | 0 | -6.584311 | -3.214730 | -2.003817 |
| 68 | 1 | 0 | -6.759033 | -3.979154 | 0.348523  |
| 69 | 6 | 0 | -3.350044 | 1.336792  | -0.766665 |
| 70 | 6 | 0 | -3.960106 | 1.607169  | 0.462210  |
| 71 | 6 | 0 | -3.191734 | 2.374004  | -1.689122 |
| 72 | 6 | 0 | -4.388852 | 2.894867  | 0.770411  |
| 73 | 1 | 0 | -4.116006 | 0.804500  | 1.177845  |
| 74 | 6 | 0 | -3.617186 | 3.664439  | -1.381598 |
| 75 | 1 | 0 | -2.740254 | 2.148304  | -2.650353 |
| 76 | 6 | 0 | -4.213531 | 3.926575  | -0.150582 |
| 77 | 1 | 0 | -4.866245 | 3.092869  | 1.725394  |
| 78 | 1 | 0 | -3.490182 | 4.463269  | -2.105948 |
| 79 | 1 | 0 | -4.549542 | 4.931142  | 0.088128  |

-----

|                                                     |                             |
|-----------------------------------------------------|-----------------------------|
| $\omega$ B97XD/6-31G(d,p)-LANL2DZ energy=           | -2619.91209672              |
| $\omega$ B97XD/6-311++G(d,p)-LANL2TZ(f)/SMD energy= | -2620.33607024              |
| Zero-point correction=                              | 0.647000 (Hartree/Particle) |
| Thermal correction to Energy=                       | 0.689598                    |
| Thermal correction to Enthalpy=                     | 0.690542                    |
| Thermal correction to Gibbs Free Energy=            | 0.568733                    |

TS6

| Center<br>Number | Atomic<br>Number | Atomic<br>Type | Coordinates (Angstroms) |           |           |
|------------------|------------------|----------------|-------------------------|-----------|-----------|
|                  |                  |                | X                       | Y         | Z         |
| 1                | 46               | 0              | -0.272110               | -0.104425 | 0.311017  |
| 2                | 6                | 0              | -1.804557               | -1.303025 | 2.441937  |
| 3                | 6                | 0              | -1.906108               | -0.461475 | 1.405849  |
| 4                | 1                | 0              | -0.856989               | -1.757122 | 2.717610  |
| 5                | 15               | 0              | 2.605233                | -0.985046 | -0.593543 |
| 6                | 8                | 0              | 1.957170                | -2.261765 | -1.211140 |
| 7                | 8                | 0              | 1.740323                | 0.268645  | -0.665130 |
| 8                | 6                | 0              | 1.140808                | 2.987453  | 0.895538  |
| 9                | 1                | 0              | 1.654747                | 3.533061  | 1.696648  |
| 10               | 1                | 0              | 1.895036                | 2.432366  | 0.328513  |
| 11               | 6                | 0              | 0.398931                | 3.981293  | -0.007202 |
| 12               | 1                | 0              | 1.133940                | 4.662631  | -0.455424 |
| 13               | 1                | 0              | -0.270845               | 4.602659  | 0.599871  |
| 14               | 15               | 0              | 0.083042                | 1.695090  | 1.681004  |
| 15               | 15               | 0              | -0.655127               | 3.235817  | -1.358772 |
| 16               | 6                | 0              | 1.041604                | 1.204797  | 3.159262  |
| 17               | 1                | 0              | 1.206307                | 2.051267  | 3.832879  |
| 18               | 1                | 0              | 0.491414                | 0.418962  | 3.682335  |
| 19               | 1                | 0              | 2.002879                | 0.792937  | 2.842480  |
| 20               | 6                | 0              | -1.338972               | 2.610097  | 2.373051  |
| 21               | 1                | 0              | -1.882294               | 1.951139  | 3.053009  |
| 22               | 1                | 0              | -1.004305               | 3.500844  | 2.913215  |
| 23               | 1                | 0              | -2.019389               | 2.892119  | 1.566397  |
| 24               | 6                | 0              | 0.659933                | 2.673606  | -2.527893 |
| 25               | 1                | 0              | 0.197135                | 2.405174  | -3.481971 |
| 26               | 1                | 0              | 1.411999                | 3.451418  | -2.707952 |
| 27               | 1                | 0              | 1.138244                | 1.778011  | -2.121671 |
| 28               | 6                | 0              | -1.146783               | 4.823670  | -2.180517 |
| 29               | 1                | 0              | -0.284247               | 5.458504  | -2.413849 |
| 30               | 1                | 0              | -1.674816               | 4.599017  | -3.111413 |
| 31               | 1                | 0              | -1.831807               | 5.381361  | -1.535460 |
| 32               | 6                | 0              | -3.126686               | -2.474225 | -1.485874 |
| 33               | 6                | 0              | -3.985449               | -2.839087 | -0.437947 |
| 34               | 6                | 0              | -5.339592               | -3.026644 | -0.678350 |
| 35               | 6                | 0              | -5.850534               | -2.869575 | -1.965123 |
| 36               | 6                | 0              | -5.002581               | -2.518773 | -3.013550 |
| 37               | 6                | 0              | -3.648760               | -2.315065 | -2.777225 |
| 38               | 1                | 0              | -3.574016               | -2.938465 | 0.561063  |
| 39               | 1                | 0              | -6.000999               | -3.292730 | 0.140086  |
| 40               | 1                | 0              | -6.909892               | -3.018332 | -2.150300 |

|    |   |   |           |           |           |
|----|---|---|-----------|-----------|-----------|
| 41 | 1 | 0 | -5.401001 | -2.393660 | -4.015665 |
| 42 | 1 | 0 | -2.982339 | -2.023663 | -3.582442 |
| 43 | 6 | 0 | -1.753516 | -2.192092 | -1.204466 |
| 44 | 6 | 0 | -0.599864 | -1.902102 | -0.882885 |
| 45 | 1 | 0 | 0.854777  | -2.183456 | -1.098020 |
| 46 | 6 | 0 | -3.180527 | 0.194866  | 1.022903  |
| 47 | 6 | 0 | -3.416003 | 0.607160  | -0.294414 |
| 48 | 6 | 0 | -4.185816 | 0.427584  | 1.973955  |
| 49 | 6 | 0 | -4.626078 | 1.186670  | -0.658154 |
| 50 | 1 | 0 | -2.640629 | 0.462073  | -1.038391 |
| 51 | 6 | 0 | -5.393765 | 1.012473  | 1.613392  |
| 52 | 1 | 0 | -4.010665 | 0.160630  | 3.012163  |
| 53 | 6 | 0 | -5.622598 | 1.388166  | 0.291812  |
| 54 | 1 | 0 | -4.787672 | 1.480114  | -1.690644 |
| 55 | 1 | 0 | -6.156170 | 1.181901  | 2.368210  |
| 56 | 1 | 0 | -6.566077 | 1.845050  | 0.008966  |
| 57 | 1 | 0 | -2.674699 | -1.608038 | 3.023022  |
| 58 | 6 | 0 | 4.175849  | -0.688885 | -1.426058 |
| 59 | 6 | 0 | 4.413446  | 0.557494  | -2.007555 |
| 60 | 6 | 0 | 5.153231  | -1.686811 | -1.487569 |
| 61 | 6 | 0 | 5.624479  | 0.804602  | -2.648198 |
| 62 | 1 | 0 | 3.644457  | 1.322069  | -1.957854 |
| 63 | 6 | 0 | 6.361221  | -1.435908 | -2.127241 |
| 64 | 1 | 0 | 4.967626  | -2.656960 | -1.036034 |
| 65 | 6 | 0 | 6.596281  | -0.189901 | -2.706819 |
| 66 | 1 | 0 | 5.807556  | 1.772474  | -3.103929 |
| 67 | 1 | 0 | 7.119459  | -2.210689 | -2.175821 |
| 68 | 1 | 0 | 7.540872  | 0.003695  | -3.205717 |
| 69 | 6 | 0 | 2.989266  | -1.354588 | 1.140412  |
| 70 | 6 | 0 | 4.065648  | -0.742676 | 1.787775  |
| 71 | 6 | 0 | 2.114438  | -2.166424 | 1.870064  |
| 72 | 6 | 0 | 4.264516  | -0.936842 | 3.152136  |
| 73 | 1 | 0 | 4.751934  | -0.117810 | 1.222886  |
| 74 | 6 | 0 | 2.310658  | -2.351724 | 3.234809  |
| 75 | 1 | 0 | 1.280063  | -2.647162 | 1.366644  |
| 76 | 6 | 0 | 3.383973  | -1.736913 | 3.876377  |
| 77 | 1 | 0 | 5.106498  | -0.464770 | 3.648561  |
| 78 | 1 | 0 | 1.628988  | -2.982026 | 3.797296  |
| 79 | 1 | 0 | 3.538276  | -1.887154 | 4.940347  |

-----  
 $\omega$ B97XD/6-31G(d,p)-LANL2DZ energy= -2619.89050895  
 $\omega$ B97XD/6-311++G(d,p)-LANL2TZ(f)/SMD energy= -2620.31118640  
Zero-point correction= 0.643550 (Hartree/Particle)  
Thermal correction to Energy= 0.685899

Thermal correction to Enthalpy= 0.686843

Thermal correction to Gibbs Free Energy= 0.565058

**INT11**

| Center<br>Number | Atomic<br>Number | Atomic<br>Type | Coordinates (Angstroms) |           |           |
|------------------|------------------|----------------|-------------------------|-----------|-----------|
|                  |                  |                | X                       | Y         | Z         |
| 1                | 46               | 0              | 0.834286                | -0.260772 | 0.300879  |
| 2                | 6                | 0              | 1.117538                | 1.826449  | 2.433117  |
| 3                | 6                | 0              | 0.797392                | 1.606733  | 1.152676  |
| 4                | 1                | 0              | 1.400590                | 1.019424  | 3.104532  |
| 5                | 6                | 0              | 3.604259                | -2.138384 | -0.112612 |
| 6                | 1                | 0              | 4.646920                | -2.217667 | -0.439103 |
| 7                | 1                | 0              | 3.520462                | -2.679356 | 0.837512  |
| 8                | 6                | 0              | 2.647554                | -2.748127 | -1.149746 |
| 9                | 1                | 0              | 2.824036                | -3.822607 | -1.266680 |
| 10               | 1                | 0              | 2.812306                | -2.285463 | -2.130163 |
| 11               | 15               | 0              | 3.153689                | -0.369890 | 0.256006  |
| 12               | 15               | 0              | 0.883158                | -2.388303 | -0.685234 |
| 13               | 6                | 0              | 4.117066                | 0.037811  | 1.753080  |
| 14               | 1                | 0              | 5.190953                | -0.095150 | 1.595425  |
| 15               | 1                | 0              | 3.901342                | 1.075345  | 2.019203  |
| 16               | 1                | 0              | 3.785701                | -0.595453 | 2.579493  |
| 17               | 6                | 0              | 3.995643                | 0.586491  | -1.061127 |
| 18               | 1                | 0              | 3.839296                | 1.651237  | -0.870684 |
| 19               | 1                | 0              | 5.068726                | 0.376019  | -1.094489 |
| 20               | 1                | 0              | 3.546564                | 0.349913  | -2.028938 |
| 21               | 6                | 0              | 0.386603                | -3.760157 | 0.418305  |
| 22               | 1                | 0              | -0.647858               | -3.577841 | 0.720216  |
| 23               | 1                | 0              | 0.465068                | -4.734732 | -0.072177 |
| 24               | 1                | 0              | 1.005847                | -3.750488 | 1.318596  |
| 25               | 6                | 0              | -0.092558               | -2.675921 | -2.200602 |
| 26               | 1                | 0              | 0.009269                | -3.697917 | -2.576237 |
| 27               | 1                | 0              | -1.137539               | -2.466271 | -1.957202 |
| 28               | 1                | 0              | 0.219758                | -1.966305 | -2.970176 |
| 29               | 6                | 0              | -3.804650               | -0.598949 | 0.222985  |
| 30               | 6                | 0              | -4.588018               | 0.290738  | -0.529906 |
| 31               | 6                | 0              | -5.966800               | 0.132696  | -0.602359 |
| 32               | 6                | 0              | -6.594317               | -0.910665 | 0.075022  |
| 33               | 6                | 0              | -5.828703               | -1.795531 | 0.830762  |
| 34               | 6                | 0              | -4.449268               | -1.643951 | 0.904195  |
| 35               | 1                | 0              | -4.097223               | 1.106058  | -1.051415 |
| 36               | 1                | 0              | -6.556565               | 0.829035  | -1.191309 |

|    |   |   |           |           |           |
|----|---|---|-----------|-----------|-----------|
| 37 | 1 | 0 | -7.671449 | -1.032484 | 0.015149  |
| 38 | 1 | 0 | -6.309005 | -2.610076 | 1.365227  |
| 39 | 1 | 0 | -3.851362 | -2.330259 | 1.495740  |
| 40 | 6 | 0 | -2.382389 | -0.450660 | 0.283832  |
| 41 | 6 | 0 | -1.169517 | -0.304014 | 0.325794  |
| 42 | 6 | 0 | 0.361929  | 2.720793  | 0.278321  |
| 43 | 6 | 0 | 0.828897  | 2.836142  | -1.038029 |
| 44 | 6 | 0 | -0.539702 | 3.689240  | 0.740409  |
| 45 | 6 | 0 | 0.443466  | 3.896548  | -1.850243 |
| 46 | 1 | 0 | 1.497269  | 2.071946  | -1.426290 |
| 47 | 6 | 0 | -0.936659 | 4.744968  | -0.073828 |
| 48 | 1 | 0 | -0.947990 | 3.589509  | 1.741215  |
| 49 | 6 | 0 | -0.441657 | 4.858842  | -1.370271 |
| 50 | 1 | 0 | 0.828494  | 3.968798  | -2.863572 |
| 51 | 1 | 0 | -1.643976 | 5.478152  | 0.303096  |
| 52 | 1 | 0 | -0.753587 | 5.681690  | -2.006342 |
| 53 | 1 | 0 | 1.087448  | 2.826802  | 2.868705  |

-----

$\omega$ B97XD/6-31G(d,p)-LANL2DZ energy= -1664.33877204  
 $\omega$ B97XD/6-311++G(d,p)-LANL2TZ(f)/SMD energy= -1664.59890034  
Zero-point correction= 0.439835 (Hartree/Particle)  
Thermal correction to Energy= 0.468861  
Thermal correction to Enthalpy= 0.469806  
Thermal correction to Gibbs Free Energy= 0.376685

### TS7

-----

| Center<br>Number | Atomic<br>Number | Atomic<br>Type | Coordinates (Angstroms) |           |           |
|------------------|------------------|----------------|-------------------------|-----------|-----------|
|                  |                  |                | X                       | Y         | Z         |
| 1                | 46               | 0              | 0.941550                | -0.286737 | 0.338575  |
| 2                | 6                | 0              | -0.361218               | 1.215480  | 2.509135  |
| 3                | 6                | 0              | -0.425358               | 1.079178  | 1.169579  |
| 4                | 1                | 0              | -0.052099               | 0.395638  | 3.148440  |
| 5                | 6                | 0              | 4.317435                | -0.541913 | -0.161846 |
| 6                | 1                | 0              | 5.248155                | -0.116352 | -0.553628 |
| 7                | 1                | 0              | 4.559360                | -1.023728 | 0.793204  |
| 8                | 6                | 0              | 3.730780                | -1.575854 | -1.136090 |
| 9                | 1                | 0              | 4.426576                | -2.408581 | -1.289576 |
| 10               | 1                | 0              | 3.561465                | -1.113015 | -2.116085 |
| 11               | 15               | 0              | 3.075320                | 0.791963  | 0.212924  |
| 12               | 15               | 0              | 2.075214                | -2.191807 | -0.543057 |
| 13               | 6                | 0              | 3.824604                | 1.663982  | 1.642598  |
| 14               | 1                | 0              | 4.843163                | 2.006939  | 1.436671  |



|    |   |   |           |           |           |
|----|---|---|-----------|-----------|-----------|
| 15 | 1 | 0 | 3.196180  | 2.522461  | 1.893331  |
| 16 | 1 | 0 | 3.833460  | 0.994534  | 2.506331  |
| 17 | 6 | 0 | 3.347376  | 1.988773  | -1.157770 |
| 18 | 1 | 0 | 2.689717  | 2.849533  | -1.011110 |
| 19 | 1 | 0 | 4.386669  | 2.328262  | -1.210409 |
| 20 | 1 | 0 | 3.073295  | 1.519598  | -2.106725 |
| 21 | 6 | 0 | 2.553475  | -3.521089 | 0.634778  |
| 22 | 1 | 0 | 1.648263  | -4.015462 | 0.995589  |
| 23 | 1 | 0 | 3.213175  | -4.263167 | 0.173734  |
| 24 | 1 | 0 | 3.055046  | -3.077416 | 1.498539  |
| 25 | 6 | 0 | 1.468679  | -3.150868 | -1.984991 |
| 26 | 1 | 0 | 2.193579  | -3.899152 | -2.320168 |
| 27 | 1 | 0 | 0.535716  | -3.647740 | -1.707785 |
| 28 | 1 | 0 | 1.247799  | -2.463808 | -2.805467 |
| 29 | 6 | 0 | -3.554524 | -1.247459 | 0.131641  |
| 30 | 6 | 0 | -4.337309 | -0.440143 | -0.713291 |
| 31 | 6 | 0 | -5.682056 | -0.723040 | -0.911845 |
| 32 | 6 | 0 | -6.276349 | -1.810444 | -0.273528 |
| 33 | 6 | 0 | -5.510899 | -2.614259 | 0.568469  |
| 34 | 6 | 0 | -4.163855 | -2.340164 | 0.770652  |
| 35 | 1 | 0 | -3.872710 | 0.413148  | -1.197277 |
| 36 | 1 | 0 | -6.273235 | -0.087916 | -1.564972 |
| 37 | 1 | 0 | -7.328543 | -2.027288 | -0.429556 |
| 38 | 1 | 0 | -5.966633 | -3.462840 | 1.070307  |
| 39 | 1 | 0 | -3.566047 | -2.966805 | 1.424610  |
| 40 | 6 | 0 | -2.179575 | -0.936153 | 0.332042  |
| 41 | 6 | 0 | -1.025809 | -0.554405 | 0.507354  |
| 42 | 6 | 0 | -0.932312 | 2.184589  | 0.309382  |
| 43 | 6 | 0 | -0.381557 | 2.439421  | -0.951364 |
| 44 | 6 | 0 | -1.995605 | 2.988838  | 0.737752  |
| 45 | 6 | 0 | -0.840621 | 3.489943  | -1.738060 |
| 46 | 1 | 0 | 0.408128  | 1.789015  | -1.317306 |
| 47 | 6 | 0 | -2.460507 | 4.038115  | -0.048583 |
| 48 | 1 | 0 | -2.470135 | 2.773372  | 1.690133  |
| 49 | 6 | 0 | -1.880684 | 4.298695  | -1.287522 |
| 50 | 1 | 0 | -0.391504 | 3.670408  | -2.710472 |
| 51 | 1 | 0 | -3.286962 | 4.648136  | 0.303982  |
| 52 | 1 | 0 | -2.247154 | 5.114393  | -1.903265 |
| 53 | 1 | 0 | -0.638700 | 2.148101  | 2.995538  |

-----  
 $\omega$ B97XD/6-31G(d,p)-LANL2DZ energy= -1664.31506377  
 $\omega$ B97XD/6-311++G(d,p)-LANL2TZ(f)/SMD energy= -1664.56788204  
Zero-point correction= 0.438686 (Hartree/Particle)  
Thermal correction to Energy= 0.467343

Thermal correction to Enthalpy= 0.468287  
 Thermal correction to Gibbs Free Energy= 0.376500

**INT12**

| Center<br>Number | Atomic<br>Number | Atomic<br>Type | Coordinates (Angstroms) |           |           |
|------------------|------------------|----------------|-------------------------|-----------|-----------|
|                  |                  |                | X                       | Y         | Z         |
| 1                | 46               | 0              | 1.143064                | -0.240069 | 0.624420  |
| 2                | 6                | 0              | 0.533585                | 0.655530  | 2.485439  |
| 3                | 6                | 0              | -0.206669               | 1.225649  | 1.411201  |
| 4                | 1                | 0              | 0.038362                | -0.070115 | 3.122774  |
| 5                | 6                | 0              | 2.091917                | -1.656223 | -2.314094 |
| 6                | 1                | 0              | 1.781078                | -2.124730 | -3.254606 |
| 7                | 1                | 0              | 3.003215                | -1.083862 | -2.525667 |
| 8                | 6                | 0              | 2.379843                | -2.719103 | -1.241675 |
| 9                | 1                | 0              | 3.209872                | -3.367603 | -1.546778 |
| 10               | 1                | 0              | 1.501207                | -3.362304 | -1.109229 |
| 11               | 15               | 0              | 0.821045                | -0.436808 | -1.707649 |
| 12               | 15               | 0              | 2.727912                | -1.955175 | 0.427939  |
| 13               | 6                | 0              | 0.979840                | 0.969750  | -2.875916 |
| 14               | 1                | 0              | 0.827155                | 0.675152  | -3.918913 |
| 15               | 1                | 0              | 0.244673                | 1.730006  | -2.597070 |
| 16               | 1                | 0              | 1.969953                | 1.418614  | -2.763405 |
| 17               | 6                | 0              | -0.775570               | -1.196593 | -2.204719 |
| 18               | 1                | 0              | -1.588516               | -0.552165 | -1.858852 |
| 19               | 1                | 0              | -0.853104               | -1.344069 | -3.286605 |
| 20               | 1                | 0              | -0.889174               | -2.157691 | -1.696771 |
| 21               | 6                | 0              | 4.491463                | -1.456690 | 0.242379  |
| 22               | 1                | 0              | 4.860955                | -1.079220 | 1.199047  |
| 23               | 1                | 0              | 5.122836                | -2.289439 | -0.085049 |
| 24               | 1                | 0              | 4.560638                | -0.643385 | -0.484462 |
| 25               | 6                | 0              | 2.877660                | -3.460662 | 1.475003  |
| 26               | 1                | 0              | 3.577169                | -4.190059 | 1.052919  |
| 27               | 1                | 0              | 3.221433                | -3.169671 | 2.470749  |
| 28               | 1                | 0              | 1.893656                | -3.924013 | 1.581639  |
| 29               | 6                | 0              | -3.819351               | -0.428026 | 0.492908  |
| 30               | 6                | 0              | -4.644992               | 0.113887  | -0.504903 |
| 31               | 6                | 0              | -5.837203               | -0.511978 | -0.848284 |
| 32               | 6                | 0              | -6.227559               | -1.684680 | -0.205963 |
| 33               | 6                | 0              | -5.414914               | -2.229293 | 0.786046  |
| 34               | 6                | 0              | -4.221773               | -1.609945 | 1.135114  |
| 35               | 1                | 0              | -4.341864               | 1.029789  | -1.002394 |
| 36               | 1                | 0              | -6.466337               | -0.080540 | -1.620910 |

|    |   |   |           |           |           |
|----|---|---|-----------|-----------|-----------|
| 37 | 1 | 0 | -7.160076 | -2.170270 | -0.475497 |
| 38 | 1 | 0 | -5.712825 | -3.142803 | 1.291552  |
| 39 | 1 | 0 | -3.586478 | -2.030859 | 1.907443  |
| 40 | 6 | 0 | -2.583176 | 0.195928  | 0.840883  |
| 41 | 6 | 0 | -1.502098 | 0.671690  | 1.121505  |
| 42 | 6 | 0 | 0.127128  | 2.540471  | 0.777163  |
| 43 | 6 | 0 | -0.763682 | 3.141071  | -0.121796 |
| 44 | 6 | 0 | 1.344541  | 3.191425  | 1.024145  |
| 45 | 6 | 0 | -0.447631 | 4.337027  | -0.758254 |
| 46 | 1 | 0 | -1.715446 | 2.658482  | -0.319496 |
| 47 | 6 | 0 | 1.658219  | 4.387013  | 0.389323  |
| 48 | 1 | 0 | 2.065418  | 2.749885  | 1.704126  |
| 49 | 6 | 0 | 0.766950  | 4.968361  | -0.509953 |
| 50 | 1 | 0 | -1.160196 | 4.778448  | -1.449275 |
| 51 | 1 | 0 | 2.610029  | 4.867034  | 0.597626  |
| 52 | 1 | 0 | 1.014606  | 5.902134  | -1.004797 |
| 53 | 1 | 0 | 1.317304  | 1.228507  | 2.970931  |

-----

$\omega$ B97XD/6-31G(d,p)-LANL2DZ energy= -1664.38324164  
 $\omega$ B97XD/6-311++G(d,p)-LANL2TZ(f)/SMD energy= -1664.63147364  
Zero-point correction= 0.440738 (Hartree/Particle)  
Thermal correction to Energy= 0.469399  
Thermal correction to Enthalpy= 0.470343  
Thermal correction to Gibbs Free Energy= 0.376373

### INT13

-----

| Center<br>Number | Atomic<br>Number | Atomic<br>Type | Coordinates (Angstroms) |           |           |
|------------------|------------------|----------------|-------------------------|-----------|-----------|
|                  |                  |                | X                       | Y         | Z         |
| 1                | 46               | 0              | -0.439229               | -0.443353 | -0.003127 |
| 2                | 6                | 0              | -1.964579               | -1.859556 | -0.080808 |
| 3                | 6                | 0              | -2.505207               | -0.716537 | 0.007452  |
| 4                | 1                | 0              | -2.049989               | -2.927735 | -0.160610 |
| 5                | 6                | 0              | 2.825419                | 0.399694  | -0.375262 |
| 6                | 1                | 0              | 2.791624                | 0.539400  | -1.462714 |
| 7                | 1                | 0              | 3.877047                | 0.256408  | -0.100461 |
| 8                | 6                | 0              | 2.231920                | 1.627414  | 0.327374  |
| 9                | 1                | 0              | 2.357608                | 1.533027  | 1.412961  |
| 10               | 1                | 0              | 2.746517                | 2.545930  | 0.021608  |
| 11               | 15               | 0              | 1.824449                | -1.130562 | -0.005727 |
| 12               | 15               | 0              | 0.398954                | 1.756766  | 0.010532  |
| 13               | 6                | 0              | 2.612910                | -2.353411 | -1.133531 |
| 14               | 1                | 0              | 3.700222                | -2.392528 | -1.008721 |

|    |   |   |           |           |           |
|----|---|---|-----------|-----------|-----------|
| 15 | 1 | 0 | 2.193972  | -3.342583 | -0.932098 |
| 16 | 1 | 0 | 2.376871  | -2.094978 | -2.168897 |
| 17 | 6 | 0 | 2.523559  | -1.642663 | 1.620801  |
| 18 | 1 | 0 | 2.072588  | -2.592604 | 1.918141  |
| 19 | 1 | 0 | 3.612741  | -1.753084 | 1.589284  |
| 20 | 1 | 0 | 2.255158  | -0.899807 | 2.376087  |
| 21 | 6 | 0 | 0.365893  | 2.637307  | -1.608371 |
| 22 | 1 | 0 | -0.671991 | 2.855800  | -1.872060 |
| 23 | 1 | 0 | 0.938261  | 3.570770  | -1.587061 |
| 24 | 1 | 0 | 0.771161  | 1.979623  | -2.381555 |
| 25 | 6 | 0 | -0.071210 | 3.113105  | 1.163531  |
| 26 | 1 | 0 | 0.554922  | 4.002510  | 1.036860  |
| 27 | 1 | 0 | -1.115655 | 3.382395  | 0.986574  |
| 28 | 1 | 0 | 0.013427  | 2.754994  | 2.192665  |
| 29 | 6 | 0 | -3.702590 | 0.155264  | 0.085509  |
| 30 | 6 | 0 | -5.018253 | -0.622464 | -0.007392 |
| 31 | 1 | 0 | -3.648536 | 0.903402  | -0.713854 |
| 32 | 1 | 0 | -3.663366 | 0.719456  | 1.024821  |
| 33 | 1 | 0 | -5.879080 | 0.050190  | 0.063849  |
| 34 | 1 | 0 | -5.079936 | -1.160215 | -0.957830 |
| 35 | 1 | 0 | -5.087257 | -1.358103 | 0.798959  |

-----

ωB97XD/6-31G(d,p)-LANL2DZ energy= -1203.64696736  
ωB97XD/6-311++G(d,p)-LANL2TZ(f)/SMD energy= -1203.79718880  
Zero-point correction= 0.299504 (Hartree/Particle)  
Thermal correction to Energy= 0.319690  
Thermal correction to Enthalpy= 0.320634  
Thermal correction to Gibbs Free Energy= 0.250065

### TS8

-----

| Center<br>Number | Atomic<br>Number | Atomic<br>Type | Coordinates (Angstroms) |           |           |
|------------------|------------------|----------------|-------------------------|-----------|-----------|
|                  |                  |                | X                       | Y         | Z         |
| 1                | 46               | 0              | 0.315745                | -0.408668 | 0.065642  |
| 2                | 6                | 0              | 2.308400                | -0.251078 | 0.145250  |
| 3                | 6                | 0              | 3.511794                | -0.052743 | 0.191276  |
| 4                | 1                | 0              | 1.409003                | -1.550654 | 0.213849  |
| 5                | 6                | 0              | -3.047096               | 0.085506  | 0.295380  |
| 6                | 1                | 0              | -3.070212               | 0.255711  | 1.378627  |
| 7                | 1                | 0              | -4.062136               | -0.196772 | -0.007491 |
| 8                | 6                | 0              | -2.589617               | 1.360888  | -0.427000 |
| 9                | 1                | 0              | -2.666854               | 1.223400  | -1.512327 |
| 10               | 1                | 0              | -3.228471               | 2.211602  | -0.163311 |

|    |    |   |           |           |           |
|----|----|---|-----------|-----------|-----------|
| 11 | 15 | 0 | -1.858404 | -1.318426 | 0.001064  |
| 12 | 15 | 0 | -0.801394 | 1.729986  | -0.058040 |
| 13 | 6  | 0 | -2.503285 | -2.603738 | 1.143325  |
| 14 | 1  | 0 | -3.575965 | -2.772031 | 1.004196  |
| 15 | 1  | 0 | -1.966930 | -3.538890 | 0.965238  |
| 16 | 1  | 0 | -2.314186 | -2.299536 | 2.175491  |
| 17 | 6  | 0 | -2.414329 | -1.950126 | -1.634973 |
| 18 | 1  | 0 | -1.854151 | -2.856461 | -1.876806 |
| 19 | 1  | 0 | -3.486462 | -2.171965 | -1.645271 |
| 20 | 1  | 0 | -2.189964 | -1.206926 | -2.403993 |
| 21 | 6  | 0 | -0.915806 | 2.621699  | 1.546682  |
| 22 | 1  | 0 | 0.080648  | 2.970937  | 1.827849  |
| 23 | 1  | 0 | -1.601033 | 3.474293  | 1.499265  |
| 24 | 1  | 0 | -1.252492 | 1.927656  | 2.320833  |
| 25 | 6  | 0 | -0.440411 | 3.096994  | -1.230614 |
| 26 | 1  | 0 | -1.171608 | 3.908305  | -1.156713 |
| 27 | 1  | 0 | 0.556851  | 3.489932  | -1.018344 |
| 28 | 1  | 0 | -0.435582 | 2.705104  | -2.250649 |
| 29 | 6  | 0 | 4.955685  | 0.188185  | 0.234090  |
| 30 | 6  | 0 | 5.771347  | -0.945947 | -0.402181 |
| 31 | 1  | 0 | 5.268408  | 0.318921  | 1.277857  |
| 32 | 1  | 0 | 5.190996  | 1.133171  | -0.272581 |
| 33 | 1  | 0 | 6.843765  | -0.734478 | -0.341789 |
| 34 | 1  | 0 | 5.576603  | -1.892933 | 0.108241  |
| 35 | 1  | 0 | 5.502387  | -1.070887 | -1.454468 |

-----

$\omega$ B97XD/6-31G(d,p)-LANL2DZ energy= -1203.60169378  
 $\omega$ B97XD/6-311++G(d,p)-LANL2TZ(f)/SMD energy= -1203.75839502  
Zero-point correction= 0.295225 (Hartree/Particle)  
Thermal correction to Energy= 0.315498  
Thermal correction to Enthalpy= 0.316442  
Thermal correction to Gibbs Free Energy= 0.244891

#### INT14

-----

| Center<br>Number | Atomic<br>Number | Atomic<br>Type | Coordinates (Angstroms) |           |           |
|------------------|------------------|----------------|-------------------------|-----------|-----------|
|                  |                  |                | X                       | Y         | Z         |
| 1                | 46               | 0              | -0.098973               | -0.720471 | -0.028709 |
| 2                | 6                | 0              | -2.086632               | -0.515275 | -0.013906 |
| 3                | 6                | 0              | -3.278131               | -0.251063 | 0.019095  |
| 4                | 1                | 0              | -0.349970               | -2.272264 | -0.102606 |
| 5                | 6                | 0              | 2.876284                | 0.822683  | -0.388966 |
| 6                | 1                | 0              | 2.813071                | 0.934045  | -1.478139 |

|    |    |   |           |           |           |
|----|----|---|-----------|-----------|-----------|
| 7  | 1  | 0 | 3.935727  | 0.894907  | -0.118034 |
| 8  | 6  | 0 | 2.049582  | 1.922431  | 0.297414  |
| 9  | 1  | 0 | 2.207583  | 1.889413  | 1.381820  |
| 10 | 1  | 0 | 2.356332  | 2.916504  | -0.044961 |
| 11 | 15 | 0 | 2.213031  | -0.874676 | 0.002978  |
| 12 | 15 | 0 | 0.236923  | 1.621395  | 0.009447  |
| 13 | 6  | 0 | 3.172158  | -1.955446 | -1.121421 |
| 14 | 1  | 0 | 4.249288  | -1.795357 | -1.014291 |
| 15 | 1  | 0 | 2.935247  | -2.997548 | -0.895297 |
| 16 | 1  | 0 | 2.873595  | -1.759000 | -2.153615 |
| 17 | 6  | 0 | 2.950712  | -1.234002 | 1.644222  |
| 18 | 1  | 0 | 2.685190  | -2.252724 | 1.935593  |
| 19 | 1  | 0 | 4.040053  | -1.129379 | 1.630659  |
| 20 | 1  | 0 | 2.527772  | -0.554086 | 2.387620  |
| 21 | 6  | 0 | -0.120201 | 2.446697  | -1.585771 |
| 22 | 1  | 0 | -1.177914 | 2.287053  | -1.809451 |
| 23 | 1  | 0 | 0.096293  | 3.518876  | -1.556932 |
| 24 | 1  | 0 | 0.463255  | 1.974820  | -2.380031 |
| 25 | 6  | 0 | -0.640415 | 2.661312  | 1.228328  |
| 26 | 1  | 0 | -0.437894 | 3.727930  | 1.096043  |
| 27 | 1  | 0 | -1.708245 | 2.462675  | 1.102422  |
| 28 | 1  | 0 | -0.360320 | 2.354132  | 2.238654  |
| 29 | 6  | 0 | -4.724172 | -0.013805 | 0.068416  |
| 30 | 6  | 0 | -5.548410 | -1.305715 | -0.017099 |
| 31 | 1  | 0 | -5.019914 | 0.658716  | -0.747760 |
| 32 | 1  | 0 | -4.977554 | 0.514001  | 0.997589  |
| 33 | 1  | 0 | -6.620664 | -1.091845 | 0.044510  |
| 34 | 1  | 0 | -5.350921 | -1.823596 | -0.959413 |
| 35 | 1  | 0 | -5.281198 | -1.983287 | 0.797994  |

-----  
 $\omega$ B97XD/6-31G(d,p)-LANL2DZ energy= -1203.61182991  
 $\omega$ B97XD/6-311++G(d,p)-LANL2TZ(f)/SMD energy= -1203.77299922  
Zero-point correction= 0.297232 (Hartree/Particle)  
Thermal correction to Energy= 0.317540  
Thermal correction to Enthalpy= 0.318484  
Thermal correction to Gibbs Free Energy= 0.247156

#### INT15a

-----

| Center<br>Number | Atomic<br>Number | Atomic<br>Type | Coordinates (Angstroms) |           |          |
|------------------|------------------|----------------|-------------------------|-----------|----------|
|                  |                  |                | X                       | Y         | Z        |
| 1                | 46               | 0              | 1.244460                | -1.024286 | 0.417188 |
| 2                | 6                | 0              | 1.249678                | -1.202570 | 2.531870 |

-----

|    |    |   |           |           |           |
|----|----|---|-----------|-----------|-----------|
| 3  | 6  | 0 | 2.424255  | -1.227958 | 2.031020  |
| 4  | 1  | 0 | -0.711538 | -1.488576 | 1.855470  |
| 5  | 15 | 0 | -1.903944 | -0.547112 | 0.350953  |
| 6  | 8  | 0 | -1.683548 | -1.418689 | 1.674862  |
| 7  | 8  | 0 | -0.860774 | -0.760547 | -0.717498 |
| 8  | 6  | 0 | 2.207062  | 0.344172  | -2.785738 |
| 9  | 1  | 0 | 2.732836  | 0.088597  | -3.715175 |
| 10 | 1  | 0 | 1.138166  | 0.381322  | -3.024184 |
| 11 | 6  | 0 | 2.686130  | 1.714252  | -2.289586 |
| 12 | 1  | 0 | 2.586083  | 2.433997  | -3.112898 |
| 13 | 1  | 0 | 3.753756  | 1.673468  | -2.041016 |
| 14 | 15 | 0 | 2.418751  | -1.062683 | -1.600785 |
| 15 | 15 | 0 | 1.777853  | 2.391057  | -0.799107 |
| 16 | 6  | 0 | 1.961487  | -2.470061 | -2.693556 |
| 17 | 1  | 0 | 2.495077  | -2.448418 | -3.649686 |
| 18 | 1  | 0 | 2.177416  | -3.409206 | -2.178525 |
| 19 | 1  | 0 | 0.884300  | -2.426799 | -2.873490 |
| 20 | 6  | 0 | 4.251447  | -1.215404 | -1.528061 |
| 21 | 1  | 0 | 4.507812  | -2.138501 | -1.001834 |
| 22 | 1  | 0 | 4.705347  | -1.230879 | -2.524582 |
| 23 | 1  | 0 | 4.663244  | -0.380243 | -0.955795 |
| 24 | 6  | 0 | 0.084102  | 2.502682  | -1.534121 |
| 25 | 1  | 0 | -0.543841 | 3.128764  | -0.893821 |
| 26 | 1  | 0 | 0.099865  | 2.931588  | -2.543352 |
| 27 | 1  | 0 | -0.363859 | 1.505716  | -1.562024 |
| 28 | 6  | 0 | 2.288887  | 4.167012  | -0.983024 |
| 29 | 1  | 0 | 2.099592  | 4.560726  | -1.988538 |
| 30 | 1  | 0 | 1.733070  | 4.773350  | -0.261696 |
| 31 | 1  | 0 | 3.354136  | 4.275178  | -0.758349 |
| 32 | 1  | 0 | 0.743362  | -1.213791 | 3.486067  |
| 33 | 6  | 0 | -1.992978 | 1.180918  | 0.886246  |
| 34 | 6  | 0 | -2.999439 | 2.029956  | 0.419364  |
| 35 | 6  | 0 | -0.977302 | 1.693902  | 1.701159  |
| 36 | 6  | 0 | -2.991073 | 3.379070  | 0.762158  |
| 37 | 1  | 0 | -3.789462 | 1.641206  | -0.216233 |
| 38 | 6  | 0 | -0.971393 | 3.042573  | 2.038569  |
| 39 | 1  | 0 | -0.177372 | 1.045729  | 2.048347  |
| 40 | 6  | 0 | -1.977127 | 3.885900  | 1.570701  |
| 41 | 1  | 0 | -3.775142 | 4.034310  | 0.396266  |
| 42 | 1  | 0 | -0.175603 | 3.434017  | 2.663920  |
| 43 | 1  | 0 | -1.970072 | 4.938967  | 1.835000  |
| 44 | 6  | 0 | -3.551389 | -1.032685 | -0.188873 |
| 45 | 6  | 0 | -3.764718 | -1.287353 | -1.544278 |
| 46 | 6  | 0 | -4.610026 | -1.134406 | 0.719188  |

|    |   |   |           |           |           |
|----|---|---|-----------|-----------|-----------|
| 47 | 6 | 0 | -5.034477 | -1.642651 | -1.991487 |
| 48 | 1 | 0 | -2.931023 | -1.213927 | -2.235487 |
| 49 | 6 | 0 | -5.875072 | -1.491607 | 0.268388  |
| 50 | 1 | 0 | -4.440479 | -0.941772 | 1.774006  |
| 51 | 6 | 0 | -6.086915 | -1.743444 | -1.086352 |
| 52 | 1 | 0 | -5.200988 | -1.842458 | -3.045080 |
| 53 | 1 | 0 | -6.695787 | -1.575740 | 0.973441  |
| 54 | 1 | 0 | -7.076647 | -2.020871 | -1.435966 |
| 55 | 6 | 0 | 3.893852  | -1.301655 | 2.215578  |
| 56 | 6 | 0 | 4.298607  | -1.352240 | 3.691195  |
| 57 | 1 | 0 | 4.352687  | -0.435170 | 1.725036  |
| 58 | 1 | 0 | 4.273129  | -2.184797 | 1.687800  |
| 59 | 1 | 0 | 5.386104  | -1.407839 | 3.799339  |
| 60 | 1 | 0 | 3.944875  | -0.460113 | 4.215516  |
| 61 | 1 | 0 | 3.858847  | -2.226175 | 4.179887  |

-----

$\omega$ B97XD/6-31G(d,p)-LANL2DZ energy= -2159.19369995  
 $\omega$ B97XD/6-311++G(d,p)-LANL2TZ(f)/SMD energy= -2159.51244718  
Zero-point correction= 0.505930 (Hartree/Particle)  
Thermal correction to Energy= 0.540487  
Thermal correction to Enthalpy= 0.541431  
Thermal correction to Gibbs Free Energy= 0.436415

### TS9

-----

| Center<br>Number | Atomic<br>Number | Atomic<br>Type | Coordinates (Angstroms) |           |           |
|------------------|------------------|----------------|-------------------------|-----------|-----------|
|                  |                  |                | X                       | Y         | Z         |
| 1                | 46               | 0              | -1.272791               | -0.960145 | 0.312770  |
| 2                | 6                | 0              | -2.776956               | -1.844993 | -0.578408 |
| 3                | 6                | 0              | -3.823906               | -2.289142 | -1.021172 |
| 4                | 1                | 0              | 0.582192                | -2.481012 | -0.772988 |
| 5                | 15               | 0              | 1.890395                | -0.925851 | -0.116356 |
| 6                | 8                | 0              | 1.554729                | -2.369438 | -0.736193 |
| 7                | 8                | 0              | 0.890975                | -0.451562 | 0.910920  |
| 8                | 6                | 0              | -1.768495               | 2.157725  | 2.390248  |
| 9                | 1                | 0              | -2.309337               | 2.473150  | 3.291646  |
| 10               | 1                | 0              | -0.717665               | 2.032096  | 2.675115  |
| 11               | 6                | 0              | -1.900097               | 3.245420  | 1.316902  |
| 12               | 1                | 0              | -1.494862               | 4.184956  | 1.715786  |
| 13               | 1                | 0              | -2.959676               | 3.427062  | 1.101477  |
| 14               | 15               | 0              | -2.378609               | 0.475270  | 1.899800  |
| 15               | 15               | 0              | -1.062000               | 2.858050  | -0.306271 |
| 16               | 6                | 0              | -2.597701               | -0.297749 | 3.555566  |



|    |   |   |           |           |           |
|----|---|---|-----------|-----------|-----------|
| 17 | 1 | 0 | -3.228400 | 0.308939  | 4.213918  |
| 18 | 1 | 0 | -3.053375 | -1.282255 | 3.424287  |
| 19 | 1 | 0 | -1.618775 | -0.437770 | 4.021406  |
| 20 | 6 | 0 | -4.111976 | 0.799570  | 1.394933  |
| 21 | 1 | 0 | -4.588333 | -0.165156 | 1.202418  |
| 22 | 1 | 0 | -4.674916 | 1.356428  | 2.150907  |
| 23 | 1 | 0 | -4.109518 | 1.350323  | 0.451112  |
| 24 | 6 | 0 | 0.698754  | 2.896227  | 0.259109  |
| 25 | 1 | 0 | 1.355343  | 2.955181  | -0.613959 |
| 26 | 1 | 0 | 0.902956  | 3.750043  | 0.915838  |
| 27 | 1 | 0 | 0.924724  | 1.962216  | 0.780771  |
| 28 | 6 | 0 | -1.170291 | 4.546710  | -1.066325 |
| 29 | 1 | 0 | -0.781445 | 5.331160  | -0.407180 |
| 30 | 1 | 0 | -0.596658 | 4.555618  | -1.997892 |
| 31 | 1 | 0 | -2.211163 | 4.776276  | -1.312324 |
| 32 | 1 | 0 | -1.331947 | -2.096610 | -0.841845 |
| 33 | 6 | 0 | 2.018971  | 0.227505  | -1.502946 |
| 34 | 6 | 0 | 3.204527  | 0.911885  | -1.781707 |
| 35 | 6 | 0 | 0.866219  | 0.506362  | -2.246776 |
| 36 | 6 | 0 | 3.236655  | 1.868631  | -2.792477 |
| 37 | 1 | 0 | 4.102168  | 0.708002  | -1.206506 |
| 38 | 6 | 0 | 0.903107  | 1.463606  | -3.253552 |
| 39 | 1 | 0 | -0.070495 | 0.002891  | -2.019464 |
| 40 | 6 | 0 | 2.086603  | 2.146742  | -3.526042 |
| 41 | 1 | 0 | 4.160168  | 2.398470  | -3.002586 |
| 42 | 1 | 0 | 0.000264  | 1.682597  | -3.813981 |
| 43 | 1 | 0 | 2.111890  | 2.897269  | -4.309945 |
| 44 | 6 | 0 | 3.525082  | -1.153711 | 0.594325  |
| 45 | 6 | 0 | 3.792364  | -0.554505 | 1.826819  |
| 46 | 6 | 0 | 4.518555  | -1.888463 | -0.060764 |
| 47 | 6 | 0 | 5.051695  | -0.689619 | 2.403097  |
| 48 | 1 | 0 | 3.006056  | -0.000277 | 2.329326  |
| 49 | 6 | 0 | 5.774889  | -2.019491 | 0.519726  |
| 50 | 1 | 0 | 4.306157  | -2.361974 | -1.014271 |
| 51 | 6 | 0 | 6.040751  | -1.419008 | 1.749487  |
| 52 | 1 | 0 | 5.258541  | -0.228634 | 3.363373  |
| 53 | 1 | 0 | 6.546067  | -2.592967 | 0.015778  |
| 54 | 1 | 0 | 7.021969  | -1.525735 | 2.201411  |
| 55 | 6 | 0 | -5.074562 | -2.821286 | -1.567364 |
| 56 | 6 | 0 | -4.899709 | -3.449538 | -2.957115 |
| 57 | 1 | 0 | -5.825868 | -2.022994 | -1.621042 |
| 58 | 1 | 0 | -5.479294 | -3.572190 | -0.877125 |
| 59 | 1 | 0 | -5.850164 | -3.846332 | -3.327850 |
| 60 | 1 | 0 | -4.533426 | -2.706973 | -3.671166 |

61            1            0            -4.174092    -4.266415    -2.920646

-----  
 $\omega$ B97XD/6-31G(d,p)-LANL2DZ energy=            -2159.14672617  
 $\omega$ B97XD/6-311++G(d,p)-LANL2TZ(f)/SMD energy=    -2159.47025456  
Zero-point correction=                            0.501509 (Hartree/Particle)  
Thermal correction to Energy=                    0.536104  
Thermal correction to Enthalpy=                0.537048  
Thermal correction to Gibbs Free Energy=      0.431949

**INT16**

-----

| Center<br>Number | Atomic<br>Number | Atomic<br>Type | Coordinates (Angstroms) |           |           |
|------------------|------------------|----------------|-------------------------|-----------|-----------|
|                  |                  |                | X                       | Y         | Z         |
| 1                | 46               | 0              | 1.424262                | -0.936895 | -0.035811 |
| 2                | 6                | 0              | 3.231345                | -1.381016 | 0.506754  |
| 3                | 6                | 0              | 4.394920                | -1.627171 | 0.771082  |
| 4                | 1                | 0              | -0.434697               | -2.619495 | 1.016068  |
| 5                | 15               | 0              | -1.749884               | -1.148683 | 0.232552  |
| 6                | 8                | 0              | -1.411160               | -2.570941 | 0.877961  |
| 7                | 8                | 0              | -0.667188               | -0.612218 | -0.682435 |
| 8                | 6                | 0              | 1.278437                | 1.890440  | -2.407050 |
| 9                | 1                | 0              | 1.711526                | 2.096789  | -3.393202 |
| 10               | 1                | 0              | 0.316120                | 1.393777  | -2.573578 |
| 11               | 6                | 0              | 1.078804                | 3.215572  | -1.659633 |
| 12               | 1                | 0              | 0.445239                | 3.875508  | -2.266793 |
| 13               | 1                | 0              | 2.043148                | 3.724664  | -1.547346 |
| 14               | 15               | 0              | 2.359845                | 0.645569  | -1.555290 |
| 15               | 15               | 0              | 0.346980                | 3.056186  | 0.050049  |
| 16               | 6                | 0              | 3.126606                | -0.242889 | -2.965391 |
| 17               | 1                | 0              | 3.661321                | 0.436107  | -3.636978 |
| 18               | 1                | 0              | 3.820756                | -0.979206 | -2.552774 |
| 19               | 1                | 0              | 2.354064                | -0.776734 | -3.524460 |
| 20               | 6                | 0              | 3.761217                | 1.623147  | -0.900191 |
| 21               | 1                | 0              | 4.483760                | 0.909094  | -0.498446 |
| 22               | 1                | 0              | 4.225460                | 2.243193  | -1.673115 |
| 23               | 1                | 0              | 3.414812                | 2.249779  | -0.075330 |
| 24               | 6                | 0              | -1.410818               | 2.718175  | -0.410502 |
| 25               | 1                | 0              | -2.035400               | 2.745884  | 0.487097  |
| 26               | 1                | 0              | -1.792934               | 3.443082  | -1.138391 |
| 27               | 1                | 0              | -1.470947               | 1.709783  | -0.826870 |
| 28               | 6                | 0              | 0.211905                | 4.862146  | 0.446528  |
| 29               | 1                | 0              | -0.296102               | 5.428131  | -0.342507 |
| 30               | 1                | 0              | -0.346182               | 4.983699  | 1.379331  |

|    |   |   |           |           |           |
|----|---|---|-----------|-----------|-----------|
| 31 | 1 | 0 | 1.208965  | 5.285766  | 0.598077  |
| 32 | 1 | 0 | 1.093875  | -2.078056 | 1.035875  |
| 33 | 6 | 0 | -2.083817 | 0.015515  | 1.573689  |
| 34 | 6 | 0 | -3.375094 | 0.476862  | 1.842367  |
| 35 | 6 | 0 | -0.998762 | 0.521721  | 2.298816  |
| 36 | 6 | 0 | -3.579293 | 1.441816  | 2.824443  |
| 37 | 1 | 0 | -4.220693 | 0.097612  | 1.277361  |
| 38 | 6 | 0 | -1.209081 | 1.484672  | 3.278705  |
| 39 | 1 | 0 | 0.011741  | 0.183238  | 2.083132  |
| 40 | 6 | 0 | -2.497001 | 1.948014  | 3.539263  |
| 41 | 1 | 0 | -4.582981 | 1.802405  | 3.025215  |
| 42 | 1 | 0 | -0.361607 | 1.881068  | 3.827750  |
| 43 | 1 | 0 | -2.657075 | 2.705048  | 4.300821  |
| 44 | 6 | 0 | -3.282219 | -1.450731 | -0.654511 |
| 45 | 6 | 0 | -3.530854 | -0.739069 | -1.830276 |
| 46 | 6 | 0 | -4.227729 | -2.359477 | -0.169370 |
| 47 | 6 | 0 | -4.725843 | -0.932787 | -2.515841 |
| 48 | 1 | 0 | -2.782352 | -0.049535 | -2.207708 |
| 49 | 6 | 0 | -5.420608 | -2.547419 | -0.858128 |
| 50 | 1 | 0 | -4.023564 | -2.921509 | 0.736380  |
| 51 | 6 | 0 | -5.669530 | -1.833266 | -2.028527 |
| 52 | 1 | 0 | -4.917824 | -0.386218 | -3.433376 |
| 53 | 1 | 0 | -6.153672 | -3.255798 | -0.486377 |
| 54 | 1 | 0 | -6.601859 | -1.982916 | -2.563946 |
| 55 | 6 | 0 | 5.776902  | -1.962536 | 1.128734  |
| 56 | 6 | 0 | 5.874872  | -3.159698 | 2.083984  |
| 57 | 1 | 0 | 6.259470  | -1.090725 | 1.589491  |
| 58 | 1 | 0 | 6.350371  | -2.178879 | 0.217982  |
| 59 | 1 | 0 | 6.920186  | -3.382317 | 2.321776  |
| 60 | 1 | 0 | 5.343092  | -2.951436 | 3.016060  |
| 61 | 1 | 0 | 5.424453  | -4.047570 | 1.632547  |

-----

|                                                     |                             |
|-----------------------------------------------------|-----------------------------|
| $\omega$ B97XD/6-31G(d,p)-LANL2DZ energy=           | -2159.15648926              |
| $\omega$ B97XD/6-311++G(d,p)-LANL2TZ(f)/SMD energy= | -2159.48323636              |
| Zero-point correction=                              | 0.504042 (Hartree/Particle) |
| Thermal correction to Energy=                       | 0.538415                    |
| Thermal correction to Enthalpy=                     | 0.539359                    |
| Thermal correction to Gibbs Free Energy=            | 0.434261                    |

### TS10a

-----

| Center | Atomic | Atomic | Coordinates (Angstroms) |   |   |
|--------|--------|--------|-------------------------|---|---|
| Number | Number | Type   | X                       | Y | Z |

-----

|    |    |   |           |           |           |
|----|----|---|-----------|-----------|-----------|
| 1  | 46 | 0 | 1.217345  | -1.050996 | 0.116658  |
| 2  | 6  | 0 | 1.077070  | -2.023763 | 2.092356  |
| 3  | 6  | 0 | 2.260407  | -1.865316 | 1.574328  |
| 4  | 1  | 0 | -0.208873 | -1.748185 | 1.573188  |
| 5  | 15 | 0 | -1.822063 | -0.611068 | 0.278107  |
| 6  | 8  | 0 | -1.457386 | -1.613357 | 1.398327  |
| 7  | 8  | 0 | -0.760950 | -0.426346 | -0.809440 |
| 8  | 6  | 0 | 2.219891  | 1.019925  | -2.529409 |
| 9  | 1  | 0 | 2.753958  | 0.957081  | -3.486035 |
| 10 | 1  | 0 | 1.150523  | 0.920698  | -2.745310 |
| 11 | 6  | 0 | 2.513137  | 2.373739  | -1.871017 |
| 12 | 1  | 0 | 2.251121  | 3.167032  | -2.583267 |
| 13 | 1  | 0 | 3.588239  | 2.472894  | -1.678341 |
| 14 | 15 | 0 | 2.674091  | -0.471065 | -1.534815 |
| 15 | 15 | 0 | 1.613686  | 2.690747  | -0.262169 |
| 16 | 6  | 0 | 2.829806  | -1.749541 | -2.843839 |
| 17 | 1  | 0 | 3.537186  | -1.448026 | -3.623025 |
| 18 | 1  | 0 | 3.162866  | -2.686817 | -2.392118 |
| 19 | 1  | 0 | 1.847069  | -1.919783 | -3.290150 |
| 20 | 6  | 0 | 4.423512  | -0.152050 | -1.084584 |
| 21 | 1  | 0 | 4.862065  | -1.069506 | -0.685021 |
| 22 | 1  | 0 | 5.008303  | 0.180245  | -1.948394 |
| 23 | 1  | 0 | 4.459003  | 0.610526  | -0.303000 |
| 24 | 6  | 0 | -0.096130 | 2.866566  | -0.935173 |
| 25 | 1  | 0 | -0.741845 | 3.310249  | -0.172532 |
| 26 | 1  | 0 | -0.118064 | 3.497374  | -1.831899 |
| 27 | 1  | 0 | -0.491501 | 1.872786  | -1.162869 |
| 28 | 6  | 0 | 2.057395  | 4.483047  | -0.081082 |
| 29 | 1  | 0 | 1.828095  | 5.064132  | -0.981728 |
| 30 | 1  | 0 | 1.497097  | 4.905143  | 0.758022  |
| 31 | 1  | 0 | 3.123121  | 4.586157  | 0.143485  |
| 32 | 1  | 0 | 0.788656  | -2.438573 | 3.054266  |
| 33 | 6  | 0 | -2.135561 | 0.991229  | 1.075265  |
| 34 | 6  | 0 | -3.166185 | 1.841951  | 0.673336  |
| 35 | 6  | 0 | -1.237817 | 1.414966  | 2.060708  |
| 36 | 6  | 0 | -3.297409 | 3.104464  | 1.246100  |
| 37 | 1  | 0 | -3.869955 | 1.518932  | -0.088465 |
| 38 | 6  | 0 | -1.363948 | 2.679248  | 2.625758  |
| 39 | 1  | 0 | -0.436837 | 0.753569  | 2.379194  |
| 40 | 6  | 0 | -2.394223 | 3.525637  | 2.218770  |
| 41 | 1  | 0 | -4.103120 | 3.760468  | 0.931405  |
| 42 | 1  | 0 | -0.658762 | 3.003247  | 3.384702  |
| 43 | 1  | 0 | -2.496674 | 4.510230  | 2.664979  |
| 44 | 6  | 0 | -3.376280 | -1.137958 | -0.476960 |

|    |   |   |           |           |           |
|----|---|---|-----------|-----------|-----------|
| 45 | 6 | 0 | -3.591895 | -0.912464 | -1.838347 |
| 46 | 6 | 0 | -4.374242 | -1.738441 | 0.295439  |
| 47 | 6 | 0 | -4.800898 | -1.279272 | -2.422530 |
| 48 | 1 | 0 | -2.802380 | -0.460201 | -2.430427 |
| 49 | 6 | 0 | -5.580306 | -2.105645 | -0.291502 |
| 50 | 1 | 0 | -4.195411 | -1.925131 | 1.349714  |
| 51 | 6 | 0 | -5.794492 | -1.873481 | -1.648840 |
| 52 | 1 | 0 | -4.966337 | -1.105827 | -3.481304 |
| 53 | 1 | 0 | -6.353267 | -2.576358 | 0.307912  |
| 54 | 1 | 0 | -6.737121 | -2.160178 | -2.105191 |
| 55 | 6 | 0 | 3.698394  | -2.108989 | 1.858810  |
| 56 | 6 | 0 | 3.928058  | -2.750090 | 3.229325  |
| 57 | 1 | 0 | 4.237620  | -1.156838 | 1.790025  |
| 58 | 1 | 0 | 4.109048  | -2.750142 | 1.068519  |
| 59 | 1 | 0 | 4.994013  | -2.918135 | 3.407870  |
| 60 | 1 | 0 | 3.543893  | -2.103731 | 4.023424  |
| 61 | 1 | 0 | 3.411675  | -3.711674 | 3.296680  |

-----

$\omega$ B97XD/6-31G(d,p)-LANL2DZ energy= -2159.18134493  
 $\omega$ B97XD/6-311++G(d,p)-LANL2TZ(f)/SMD energy= -2159.50247324  
Zero-point correction= 0.501961 (Hartree/Particle)  
Thermal correction to Energy= 0.535403  
Thermal correction to Enthalpy= 0.536347  
Thermal correction to Gibbs Free Energy= 0.434696

### INT17a

-----

| Center<br>Number | Atomic<br>Number | Atomic<br>Type | Coordinates (Angstroms) |           |           |
|------------------|------------------|----------------|-------------------------|-----------|-----------|
|                  |                  |                | X                       | Y         | Z         |
| 1                | 46               | 0              | 0.895328                | -1.074939 | 0.112005  |
| 2                | 6                | 0              | 2.502232                | -3.137056 | 1.414574  |
| 3                | 6                | 0              | 2.090872                | -1.869593 | 1.474520  |
| 4                | 1                | 0              | 2.281374                | -3.774301 | 0.562889  |
| 5                | 15               | 0              | -1.710620               | -0.331389 | 0.128033  |
| 6                | 8                | 0              | -0.984514               | -1.047202 | 1.278664  |
| 7                | 8                | 0              | -0.822822               | -0.260623 | -1.129746 |
| 8                | 6                | 0              | 2.467316                | 0.482803  | -2.430805 |
| 9                | 1                | 0              | 3.084811                | 0.244715  | -3.305724 |
| 10               | 1                | 0              | 1.418279                | 0.425444  | -2.741399 |
| 11               | 6                | 0              | 2.808895                | 1.892564  | -1.929630 |
| 12               | 1                | 0              | 2.668898                | 2.599559  | -2.757250 |
| 13               | 1                | 0              | 3.869234                | 1.943791  | -1.654936 |
| 14               | 15               | 0              | 2.703557                | -0.866197 | -1.190992 |

|    |    |   |           |           |           |
|----|----|---|-----------|-----------|-----------|
| 15 | 15 | 0 | 1.819704  | 2.485311  | -0.456259 |
| 16 | 6  | 0 | 3.036098  | -2.339850 | -2.223315 |
| 17 | 1  | 0 | 3.887069  | -2.174479 | -2.890926 |
| 18 | 1  | 0 | 3.248006  | -3.188448 | -1.569039 |
| 19 | 1  | 0 | 2.146471  | -2.570451 | -2.813895 |
| 20 | 6  | 0 | 4.322904  | -0.514954 | -0.420622 |
| 21 | 1  | 0 | 4.592183  | -1.362076 | 0.212830  |
| 22 | 1  | 0 | 5.093714  | -0.355343 | -1.180480 |
| 23 | 1  | 0 | 4.238180  | 0.373572  | 0.209050  |
| 24 | 6  | 0 | 0.229338  | 2.871358  | -1.307522 |
| 25 | 1  | 0 | -0.413652 | 3.442161  | -0.631622 |
| 26 | 1  | 0 | 0.389424  | 3.452134  | -2.223456 |
| 27 | 1  | 0 | -0.284137 | 1.933906  | -1.539856 |
| 28 | 6  | 0 | 2.541268  | 4.189700  | -0.346095 |
| 29 | 1  | 0 | 2.544844  | 4.705588  | -1.312900 |
| 30 | 1  | 0 | 1.950060  | 4.779935  | 0.359698  |
| 31 | 1  | 0 | 3.565728  | 4.141261  | 0.034298  |
| 32 | 1  | 0 | 3.036507  | -3.604265 | 2.240394  |
| 33 | 6  | 0 | -2.143462 | 1.346845  | 0.669501  |
| 34 | 6  | 0 | -3.092643 | 2.106753  | -0.017989 |
| 35 | 6  | 0 | -1.427254 | 1.923264  | 1.720815  |
| 36 | 6  | 0 | -3.316327 | 3.433535  | 0.333930  |
| 37 | 1  | 0 | -3.656345 | 1.659749  | -0.832547 |
| 38 | 6  | 0 | -1.651063 | 3.251530  | 2.072748  |
| 39 | 1  | 0 | -0.695016 | 1.322298  | 2.250831  |
| 40 | 6  | 0 | -2.592448 | 4.007619  | 1.377611  |
| 41 | 1  | 0 | -4.053585 | 4.020903  | -0.204533 |
| 42 | 1  | 0 | -1.092942 | 3.696039  | 2.891096  |
| 43 | 1  | 0 | -2.766502 | 5.043947  | 1.651223  |
| 44 | 6  | 0 | -3.277328 | -1.135388 | -0.289908 |
| 45 | 6  | 0 | -3.569084 | -1.424710 | -1.624118 |
| 46 | 6  | 0 | -4.202336 | -1.454142 | 0.708804  |
| 47 | 6  | 0 | -4.780193 | -2.025244 | -1.958761 |
| 48 | 1  | 0 | -2.836574 | -1.178909 | -2.386505 |
| 49 | 6  | 0 | -5.409292 | -2.056183 | 0.372577  |
| 50 | 1  | 0 | -3.972635 | -1.236302 | 1.747824  |
| 51 | 6  | 0 | -5.699075 | -2.339153 | -0.961644 |
| 52 | 1  | 0 | -5.004961 | -2.248401 | -2.997207 |
| 53 | 1  | 0 | -6.125433 | -2.307254 | 1.148685  |
| 54 | 1  | 0 | -6.643159 | -2.808353 | -1.221681 |
| 55 | 6  | 0 | 2.322645  | -0.920047 | 2.622879  |
| 56 | 6  | 0 | 3.209222  | -1.454249 | 3.748633  |
| 57 | 1  | 0 | 1.339499  | -0.642424 | 3.023558  |
| 58 | 1  | 0 | 2.746572  | 0.011542  | 2.225763  |

|    |   |   |          |           |          |
|----|---|---|----------|-----------|----------|
| 59 | 1 | 0 | 3.341426 | -0.693561 | 4.523240 |
| 60 | 1 | 0 | 2.765625 | -2.337607 | 4.217359 |
| 61 | 1 | 0 | 4.199325 | -1.732855 | 3.372845 |

-----

ωB97XD/6-31G(d,p)-LANL2DZ energy= -2159.23059285  
ωB97XD/6-311++G(d,p)-LANL2TZ(f)/SMD energy= -2159.55006423  
Zero-point correction= 0.508242 (Hartree/Particle)  
Thermal correction to Energy= 0.541847  
Thermal correction to Enthalpy= 0.542792  
Thermal correction to Gibbs Free Energy= 0.439274

**INT15b**

-----

| Center<br>Number | Atomic<br>Number | Atomic<br>Type | Coordinates (Angstroms) |           |           |
|------------------|------------------|----------------|-------------------------|-----------|-----------|
|                  |                  |                | X                       | Y         | Z         |
| 1                | 46               | 0              | -1.264801               | 0.860772  | -0.917869 |
| 2                | 6                | 0              | -0.476907               | 2.817263  | -0.921130 |
| 3                | 6                | 0              | -1.671572               | 2.802543  | -1.350233 |
| 4                | 1                | 0              | -2.547049               | 3.298006  | -1.730584 |
| 5                | 1                | 0              | 0.998851                | 1.088569  | -1.925667 |
| 6                | 15               | 0              | 1.609758                | -0.335193 | -0.466173 |
| 7                | 8                | 0              | 1.799336                | 0.534540  | -1.807779 |
| 8                | 8                | 0              | 0.264845                | -0.986134 | -0.301514 |
| 9                | 6                | 0              | -2.870326               | -2.293640 | -0.215237 |
| 10               | 1                | 0              | -3.436971               | -3.096155 | -0.705336 |
| 11               | 1                | 0              | -1.827777               | -2.624224 | -0.150977 |
| 12               | 6                | 0              | -3.449061               | -2.061949 | 1.185969  |
| 13               | 1                | 0              | -3.532969               | -3.031412 | 1.695161  |
| 14               | 1                | 0              | -4.468625               | -1.664346 | 1.111848  |
| 15               | 15               | 0              | -2.858622               | -0.824438 | -1.347097 |
| 16               | 15               | 0              | -2.487259               | -0.904645 | 2.291750  |
| 17               | 6                | 0              | -2.605800               | -1.681015 | -2.957874 |
| 18               | 1                | 0              | -3.352158               | -2.462649 | -3.137004 |
| 19               | 1                | 0              | -2.650094               | -0.945351 | -3.764527 |
| 20               | 1                | 0              | -1.607340               | -2.125906 | -2.961873 |
| 21               | 6                | 0              | -4.646651               | -0.396165 | -1.440533 |
| 22               | 1                | 0              | -4.789317               | 0.327615  | -2.247255 |
| 23               | 1                | 0              | -5.275490               | -1.273340 | -1.627802 |
| 24               | 1                | 0              | -4.955948               | 0.082401  | -0.508112 |
| 25               | 6                | 0              | -0.998377               | -1.961117 | 2.603032  |
| 26               | 1                | 0              | -0.408324               | -1.525549 | 3.415282  |
| 27               | 1                | 0              | -1.264660               | -2.990052 | 2.871866  |
| 28               | 1                | 0              | -0.379525               | -1.960194 | 1.701260  |

|    |   |   |           |           |           |
|----|---|---|-----------|-----------|-----------|
| 29 | 6 | 0 | -3.424839 | -1.235442 | 3.859473  |
| 30 | 1 | 0 | -3.531129 | -2.306254 | 4.068439  |
| 31 | 1 | 0 | -2.906974 | -0.764556 | 4.699974  |
| 32 | 1 | 0 | -4.421534 | -0.789472 | 3.793000  |
| 33 | 6 | 0 | 1.980629  | 0.762072  | 0.922295  |
| 34 | 6 | 0 | 3.223355  | 1.391610  | 1.030896  |
| 35 | 6 | 0 | 0.986891  | 1.008992  | 1.871625  |
| 36 | 6 | 0 | 3.468660  | 2.269313  | 2.080460  |
| 37 | 1 | 0 | 3.999290  | 1.198964  | 0.295299  |
| 38 | 6 | 0 | 1.236896  | 1.886841  | 2.921860  |
| 39 | 1 | 0 | 0.011819  | 0.544554  | 1.762521  |
| 40 | 6 | 0 | 2.474448  | 2.516845  | 3.025725  |
| 41 | 1 | 0 | 4.432658  | 2.760944  | 2.162064  |
| 42 | 1 | 0 | 0.458567  | 2.085780  | 3.651454  |
| 43 | 1 | 0 | 2.665664  | 3.206573  | 3.842103  |
| 44 | 6 | 0 | 2.956058  | -1.520632 | -0.621300 |
| 45 | 6 | 0 | 4.108133  | -1.241437 | -1.362058 |
| 46 | 6 | 0 | 2.836526  | -2.740504 | 0.049655  |
| 47 | 6 | 0 | 5.136455  | -2.176264 | -1.421743 |
| 48 | 1 | 0 | 4.188155  | -0.304158 | -1.903242 |
| 49 | 6 | 0 | 3.866535  | -3.672621 | -0.014833 |
| 50 | 1 | 0 | 1.930270  | -2.959724 | 0.606281  |
| 51 | 6 | 0 | 5.016740  | -3.388952 | -0.747187 |
| 52 | 1 | 0 | 6.029655  | -1.960793 | -1.999372 |
| 53 | 1 | 0 | 3.769476  | -4.622381 | 0.501056  |
| 54 | 1 | 0 | 5.819184  | -4.118306 | -0.797231 |
| 55 | 6 | 0 | 0.718447  | 3.613731  | -0.537299 |
| 56 | 6 | 0 | 0.575407  | 5.100258  | -0.869797 |
| 57 | 1 | 0 | 1.612225  | 3.204575  | -1.023554 |
| 58 | 1 | 0 | 0.892976  | 3.481381  | 0.536949  |
| 59 | 1 | 0 | 1.467082  | 5.657395  | -0.564897 |
| 60 | 1 | 0 | 0.429559  | 5.245010  | -1.944185 |
| 61 | 1 | 0 | -0.290190 | 5.526045  | -0.354411 |

-----

|                                             |                             |
|---------------------------------------------|-----------------------------|
| ωB97XD/6-31G(d,p)-LANL2DZ energy=           | -2159.19216503              |
| ωB97XD/6-311++G(d,p)-LANL2TZ(f)/SMD energy= | -2159.51062210              |
| Zero-point correction=                      | 0.506069 (Hartree/Particle) |
| Thermal correction to Energy=               | 0.540783                    |
| Thermal correction to Enthalpy=             | 0.541727                    |
| Thermal correction to Gibbs Free Energy=    | 0.436382                    |

### TS10b

-----

| Center | Atomic | Atomic | Coordinates (Angstroms) |
|--------|--------|--------|-------------------------|
|--------|--------|--------|-------------------------|



| Number | Number | Type | X         | Y         | Z         |
|--------|--------|------|-----------|-----------|-----------|
| 1      | 46     | 0    | 1.229717  | -1.232081 | 0.134458  |
| 2      | 6      | 0    | 0.746016  | -2.207316 | 2.074309  |
| 3      | 6      | 0    | 1.967899  | -2.249375 | 1.642418  |
| 4      | 1      | 0    | 2.944641  | -2.619640 | 1.916962  |
| 5      | 1      | 0    | -0.383092 | -1.590147 | 1.410876  |
| 6      | 15     | 0    | -1.665754 | -0.199415 | 0.005933  |
| 7      | 8      | 0    | -1.560079 | -1.182233 | 1.200322  |
| 8      | 8      | 0    | -0.493246 | -0.235676 | -0.974367 |
| 9      | 6      | 0    | 3.161344  | 0.789575  | -2.026039 |
| 10     | 1      | 0    | 3.944003  | 0.731767  | -2.793612 |
| 11     | 1      | 0    | 2.219761  | 1.005325  | -2.543179 |
| 12     | 6      | 0    | 3.493818  | 1.911658  | -1.034683 |
| 13     | 1      | 0    | 3.686779  | 2.829025  | -1.605981 |
| 14     | 1      | 0    | 4.421111  | 1.679524  | -0.497016 |
| 15     | 15     | 0    | 2.973776  | -0.897131 | -1.297177 |
| 16     | 15     | 0    | 2.163476  | 2.265740  | 0.233733  |
| 17     | 6      | 0    | 2.918533  | -1.933949 | -2.811116 |
| 18     | 1      | 0    | 3.764195  | -1.731437 | -3.476221 |
| 19     | 1      | 0    | 2.925115  | -2.988101 | -2.524310 |
| 20     | 1      | 0    | 1.982723  | -1.734416 | -3.338663 |
| 21     | 6      | 0    | 4.649518  | -1.240915 | -0.634527 |
| 22     | 1      | 0    | 4.713118  | -2.298938 | -0.367752 |
| 23     | 1      | 0    | 5.431490  | -1.005206 | -1.363207 |
| 24     | 1      | 0    | 4.806199  | -0.654753 | 0.273884  |
| 25     | 6      | 0    | 0.840033  | 2.855865  | -0.913258 |
| 26     | 1      | 0    | 0.096796  | 3.415787  | -0.339116 |
| 27     | 1      | 0    | 1.239085  | 3.504038  | -1.702770 |
| 28     | 1      | 0    | 0.333638  | 1.990817  | -1.350306 |
| 29     | 6      | 0    | 2.802973  | 3.905423  | 0.821288  |
| 30     | 1      | 0    | 2.977817  | 4.610325  | 0.000462  |
| 31     | 1      | 0    | 2.069454  | 4.341817  | 1.505664  |
| 32     | 1      | 0    | 3.737013  | 3.767499  | 1.373801  |
| 33     | 6      | 0    | -1.824575 | 1.464094  | 0.715934  |
| 34     | 6      | 0    | -2.599734 | 2.459185  | 0.117626  |
| 35     | 6      | 0    | -1.061675 | 1.771178  | 1.846408  |
| 36     | 6      | 0    | -2.607977 | 3.749896  | 0.639040  |
| 37     | 1      | 0    | -3.199270 | 2.225803  | -0.757884 |
| 38     | 6      | 0    | -1.064617 | 3.062869  | 2.362768  |
| 39     | 1      | 0    | -0.461094 | 0.996358  | 2.313216  |
| 40     | 6      | 0    | -1.837020 | 4.053575  | 1.758941  |
| 41     | 1      | 0    | -3.215132 | 4.518675  | 0.171305  |
| 42     | 1      | 0    | -0.467082 | 3.295247  | 3.238921  |

|    |   |   |           |           |           |
|----|---|---|-----------|-----------|-----------|
| 43 | 1 | 0 | -1.843554 | 5.060116  | 2.166210  |
| 44 | 6 | 0 | -3.208790 | -0.540172 | -0.869870 |
| 45 | 6 | 0 | -4.344304 | -0.948965 | -0.164960 |
| 46 | 6 | 0 | -3.276370 | -0.359820 | -2.253196 |
| 47 | 6 | 0 | -5.539556 | -1.169742 | -0.839942 |
| 48 | 1 | 0 | -4.280427 | -1.103073 | 0.907720  |
| 49 | 6 | 0 | -4.475467 | -0.578660 | -2.925829 |
| 50 | 1 | 0 | -2.382525 | -0.060055 | -2.791483 |
| 51 | 6 | 0 | -5.605907 | -0.980684 | -2.219205 |
| 52 | 1 | 0 | -6.419925 | -1.491730 | -0.292624 |
| 53 | 1 | 0 | -4.527771 | -0.438927 | -4.001121 |
| 54 | 1 | 0 | -6.541153 | -1.151338 | -2.743745 |
| 55 | 6 | 0 | 0.017675  | -2.743790 | 3.280646  |
| 56 | 6 | 0 | -0.907524 | -3.907971 | 2.911756  |
| 57 | 1 | 0 | -0.580781 | -1.938295 | 3.720010  |
| 58 | 1 | 0 | 0.748005  | -3.061784 | 4.032334  |
| 59 | 1 | 0 | -1.436894 | -4.273689 | 3.796938  |
| 60 | 1 | 0 | -1.646255 | -3.584784 | 2.174139  |
| 61 | 1 | 0 | -0.334614 | -4.736490 | 2.485464  |

-----

$\omega$ B97XD/6-31G(d,p)-LANL2DZ energy= -2159.17720896  
 $\omega$ B97XD/6-311++G(d,p)-LANL2TZ(f)/SMD energy= -2159.49733385  
Zero-point correction= 0.501597 (Hartree/Particle)  
Thermal correction to Energy= 0.535284  
Thermal correction to Enthalpy= 0.536229  
Thermal correction to Gibbs Free Energy= 0.433440

### INT17b

-----

| Center<br>Number | Atomic<br>Number | Atomic<br>Type | Coordinates (Angstroms) |           |           |
|------------------|------------------|----------------|-------------------------|-----------|-----------|
|                  |                  |                | X                       | Y         | Z         |
| 1                | 46               | 0              | 1.061562                | -0.859480 | -0.143571 |
| 2                | 6                | 0              | 1.792937                | -2.505807 | 2.059370  |
| 3                | 6                | 0              | 2.315724                | -1.808796 | 1.050833  |
| 4                | 1                | 0              | 3.399031                | -1.750220 | 0.940364  |
| 5                | 1                | 0              | 0.709486                | -2.555484 | 2.172391  |
| 6                | 15               | 0              | -1.596885               | -0.302732 | -0.033478 |
| 7                | 8                | 0              | -0.836922               | -1.226707 | 0.933567  |
| 8                | 8                | 0              | -0.700207               | 0.093955  | -1.223331 |
| 9                | 6                | 0              | 2.446397                | 1.415122  | -2.209504 |
| 10               | 1                | 0              | 3.061189                | 1.502776  | -3.114453 |
| 11               | 1                | 0              | 1.396824                | 1.456984  | -2.521650 |
| 12               | 6                | 0              | 2.773434                | 2.564617  | -1.246936 |

|    |    |   |           |           |           |
|----|----|---|-----------|-----------|-----------|
| 13 | 1  | 0 | 2.730132  | 3.505315  | -1.810706 |
| 14 | 1  | 0 | 3.802571  | 2.471002  | -0.879288 |
| 15 | 15 | 0 | 2.700734  | -0.285396 | -1.547806 |
| 16 | 15 | 0 | 1.644383  | 2.704642  | 0.239833  |
| 17 | 6  | 0 | 2.686519  | -1.304122 | -3.069014 |
| 18 | 1  | 0 | 3.437261  | -0.962550 | -3.788268 |
| 19 | 1  | 0 | 2.876743  | -2.347285 | -2.807607 |
| 20 | 1  | 0 | 1.693195  | -1.240570 | -3.519543 |
| 21 | 6  | 0 | 4.452675  | -0.311779 | -1.026273 |
| 22 | 1  | 0 | 4.772207  | -1.344637 | -0.870013 |
| 23 | 1  | 0 | 5.087784  | 0.145438  | -1.790479 |
| 24 | 1  | 0 | 4.565060  | 0.228897  | -0.083911 |
| 25 | 6  | 0 | 0.117355  | 3.283233  | -0.622065 |
| 26 | 1  | 0 | -0.596147 | 3.651395  | 0.120723  |
| 27 | 1  | 0 | 0.328784  | 4.081929  | -1.342844 |
| 28 | 1  | 0 | -0.346399 | 2.431193  | -1.126815 |
| 29 | 6  | 0 | 2.273390  | 4.330224  | 0.874711  |
| 30 | 1  | 0 | 2.318850  | 5.099303  | 0.095245  |
| 31 | 1  | 0 | 1.605105  | 4.678300  | 1.667564  |
| 32 | 1  | 0 | 3.269329  | 4.205056  | 1.309386  |
| 33 | 6  | 0 | -2.119103 | 1.170611  | 0.888840  |
| 34 | 6  | 0 | -3.123081 | 2.018992  | 0.416164  |
| 35 | 6  | 0 | -1.415317 | 1.509507  | 2.047151  |
| 36 | 6  | 0 | -3.415105 | 3.200740  | 1.089877  |
| 37 | 1  | 0 | -3.676400 | 1.755524  | -0.481409 |
| 38 | 6  | 0 | -1.706455 | 2.693104  | 2.719227  |
| 39 | 1  | 0 | -0.640057 | 0.839992  | 2.406008  |
| 40 | 6  | 0 | -2.703422 | 3.539993  | 2.239584  |
| 41 | 1  | 0 | -4.195393 | 3.858414  | 0.719546  |
| 42 | 1  | 0 | -1.156884 | 2.953109  | 3.618757  |
| 43 | 1  | 0 | -2.930418 | 4.463560  | 2.763764  |
| 44 | 6  | 0 | -3.115524 | -1.069247 | -0.650960 |
| 45 | 6  | 0 | -4.102506 | -1.500947 | 0.240776  |
| 46 | 6  | 0 | -3.298070 | -1.243006 | -2.023594 |
| 47 | 6  | 0 | -5.260475 | -2.101960 | -0.238376 |
| 48 | 1  | 0 | -3.961742 | -1.364714 | 1.309301  |
| 49 | 6  | 0 | -4.459963 | -1.843744 | -2.501882 |
| 50 | 1  | 0 | -2.523510 | -0.903878 | -2.704100 |
| 51 | 6  | 0 | -5.439004 | -2.273021 | -1.610485 |
| 52 | 1  | 0 | -6.023678 | -2.438244 | 0.456378  |
| 53 | 1  | 0 | -4.600838 | -1.978624 | -3.569815 |
| 54 | 1  | 0 | -6.344268 | -2.741683 | -1.984500 |
| 55 | 6  | 0 | 2.603457  | -3.256960 | 3.084069  |
| 56 | 6  | 0 | 2.283425  | -4.755459 | 3.090604  |

|    |   |   |          |           |          |
|----|---|---|----------|-----------|----------|
| 57 | 1 | 0 | 2.393114 | -2.842806 | 4.079259 |
| 58 | 1 | 0 | 3.673366 | -3.103021 | 2.899750 |
| 59 | 1 | 0 | 2.850023 | -5.279540 | 3.866794 |
| 60 | 1 | 0 | 1.218187 | -4.924888 | 3.277691 |
| 61 | 1 | 0 | 2.525446 | -5.207439 | 2.123950 |

-----

$\omega$ B97XD/6-31G(d,p)-LANL2DZ energy= -2159.22387919  
 $\omega$ B97XD/6-311++G(d,p)-LANL2TZ(f)/SMD energy= -2159.54397100  
Zero-point correction= 0.509076 (Hartree/Particle)  
Thermal correction to Energy= 0.542715  
Thermal correction to Enthalpy= 0.543659  
Thermal correction to Gibbs Free Energy= 0.440341

### INT18

-----

| Center<br>Number | Atomic<br>Number | Atomic<br>Type | Coordinates (Angstroms) |           |           |
|------------------|------------------|----------------|-------------------------|-----------|-----------|
|                  |                  |                | X                       | Y         | Z         |
| 1                | 46               | 0              | -1.050140               | 0.762720  | 0.188597  |
| 2                | 6                | 0              | -2.517000               | 3.159699  | -0.557092 |
| 3                | 6                | 0              | -2.614315               | 2.013127  | 0.121216  |
| 4                | 1                | 0              | -1.632005               | 3.423639  | -1.132355 |
| 5                | 15               | 0              | 1.819582                | -0.235063 | -0.792377 |
| 6                | 8                | 0              | 1.521004                | -0.455667 | -2.250701 |
| 7                | 8                | 0              | 0.705982                | -0.525576 | 0.241397  |
| 8                | 6                | 0              | -1.420918               | -1.841102 | -2.125737 |
| 9                | 1                | 0              | -1.492129               | -1.962549 | -3.213652 |
| 10               | 1                | 0              | -0.360860               | -1.924923 | -1.873734 |
| 11               | 6                | 0              | -2.276388               | -2.909469 | -1.438170 |
| 12               | 1                | 0              | -1.888754               | -3.896950 | -1.719154 |
| 13               | 1                | 0              | -3.307593               | -2.863315 | -1.809228 |
| 14               | 15               | 0              | -1.886505               | -0.094509 | -1.774217 |
| 15               | 15               | 0              | -2.360408               | -2.800792 | 0.421150  |
| 16               | 6                | 0              | -1.212507               | 0.809093  | -3.209342 |
| 17               | 1                | 0              | -1.699009               | 0.475740  | -4.131091 |
| 18               | 1                | 0              | -1.380709               | 1.880026  | -3.075527 |
| 19               | 1                | 0              | -0.140927               | 0.587561  | -3.248218 |
| 20               | 6                | 0              | -3.693398               | -0.069057 | -2.064213 |
| 21               | 1                | 0              | -4.046967               | 0.963048  | -2.032221 |
| 22               | 1                | 0              | -3.914109               | -0.504825 | -3.043274 |
| 23               | 1                | 0              | -4.206781               | -0.644357 | -1.291017 |
| 24               | 6                | 0              | -0.662576               | -3.392171 | 0.838998  |
| 25               | 1                | 0              | -0.595958               | -3.580235 | 1.914724  |
| 26               | 1                | 0              | -0.409184               | -4.314216 | 0.303918  |

|    |   |   |           |           |           |
|----|---|---|-----------|-----------|-----------|
| 27 | 1 | 0 | 0.053717  | -2.603255 | 0.587459  |
| 28 | 6 | 0 | -3.332729 | -4.349632 | 0.724963  |
| 29 | 1 | 0 | -2.888349 | -5.221558 | 0.232276  |
| 30 | 1 | 0 | -3.380666 | -4.542706 | 1.800260  |
| 31 | 1 | 0 | -4.357429 | -4.223476 | 0.363336  |
| 32 | 6 | 0 | -0.233005 | 1.491116  | 2.459702  |
| 33 | 6 | 0 | -0.023272 | 2.335595  | 1.607770  |
| 34 | 1 | 0 | 0.263876  | 3.145951  | 0.970389  |
| 35 | 1 | 0 | -3.320976 | 3.896665  | -0.540520 |
| 36 | 6 | 0 | 2.307574  | 1.510340  | -0.532908 |
| 37 | 6 | 0 | 3.056146  | 1.922059  | 0.572191  |
| 38 | 6 | 0 | 1.802186  | 2.476837  | -1.406434 |
| 39 | 6 | 0 | 3.282995  | 3.274611  | 0.809436  |
| 40 | 1 | 0 | 3.461108  | 1.180718  | 1.254983  |
| 41 | 6 | 0 | 2.013763  | 3.832008  | -1.164283 |
| 42 | 1 | 0 | 1.242349  | 2.155320  | -2.278737 |
| 43 | 6 | 0 | 2.752872  | 4.232870  | -0.052445 |
| 44 | 1 | 0 | 3.867905  | 3.582925  | 1.670669  |
| 45 | 1 | 0 | 1.615132  | 4.574584  | -1.849302 |
| 46 | 1 | 0 | 2.925085  | 5.288417  | 0.134994  |
| 47 | 6 | 0 | 3.241462  | -1.234152 | -0.260227 |
| 48 | 6 | 0 | 3.407200  | -1.605759 | 1.076839  |
| 49 | 6 | 0 | 4.187869  | -1.636412 | -1.205668 |
| 50 | 6 | 0 | 4.513857  | -2.354180 | 1.467031  |
| 51 | 1 | 0 | 2.657882  | -1.310256 | 1.805074  |
| 52 | 6 | 0 | 5.292236  | -2.388625 | -0.816789 |
| 53 | 1 | 0 | 4.038026  | -1.367386 | -2.246797 |
| 54 | 6 | 0 | 5.458101  | -2.743734 | 0.520015  |
| 55 | 1 | 0 | 4.638538  | -2.637747 | 2.507832  |
| 56 | 1 | 0 | 6.022587  | -2.702034 | -1.556474 |
| 57 | 1 | 0 | 6.320978  | -3.329348 | 0.823207  |
| 58 | 6 | 0 | -3.850047 | 1.649024  | 0.907796  |
| 59 | 6 | 0 | -3.604608 | 1.356732  | 2.389635  |
| 60 | 1 | 0 | -4.312094 | 0.760206  | 0.462832  |
| 61 | 1 | 0 | -4.579753 | 2.464968  | 0.810871  |
| 62 | 1 | 0 | -4.554461 | 1.200269  | 2.909560  |
| 63 | 1 | 0 | -3.007374 | 0.447942  | 2.505847  |
| 64 | 1 | 0 | -3.077837 | 2.185592  | 2.872110  |
| 65 | 6 | 0 | -0.379855 | 0.581166  | 3.600822  |
| 66 | 6 | 0 | -0.417800 | -0.901326 | 3.221319  |
| 67 | 1 | 0 | -1.287122 | 0.855934  | 4.149968  |
| 68 | 1 | 0 | 0.465780  | 0.776058  | 4.270517  |
| 69 | 1 | 0 | -0.428467 | -1.515029 | 4.126247  |
| 70 | 1 | 0 | -1.312285 | -1.127957 | 2.633810  |

71            1            0            0.442314   -1.165083   2.604461

```
-----
ωB97XD/6-31G(d,p)-LANL2DZ energy=          -2315.17362621
ωB97XD/6-311++G(d,p)-LANL2TZ(f)/SMD energy= -2315.52917032
Zero-point correction=                      0.597454 (Hartree/Particle)
Thermal correction to Energy=               0.636517
Thermal correction to Enthalpy=            0.637461
Thermal correction to Gibbs Free Energy=    0.525752
```

**TS11**

```
-----
```

| Center<br>Number | Atomic<br>Number | Atomic<br>Type | Coordinates (Angstroms) |           |           |
|------------------|------------------|----------------|-------------------------|-----------|-----------|
|                  |                  |                | X                       | Y         | Z         |
| 1                | 46               | 0              | 1.020522                | -0.275507 | 0.189975  |
| 2                | 6                | 0              | 2.895499                | -2.159298 | -0.986738 |
| 3                | 6                | 0              | 2.797231                | -1.078146 | -0.210000 |
| 4                | 1                | 0              | 2.018625                | -2.634458 | -1.419278 |
| 5                | 15               | 0              | -2.082456               | -0.480421 | 0.701472  |
| 6                | 8                | 0              | -1.734935               | -1.356464 | 1.930028  |
| 7                | 8                | 0              | -1.064376               | 0.613962  | 0.383582  |
| 8                | 6                | 0              | 0.301637                | 2.415433  | -1.851041 |
| 9                | 1                | 0              | 0.011136                | 2.633712  | -2.886036 |
| 10               | 1                | 0              | -0.612825               | 2.243554  | -1.274566 |
| 11               | 6                | 0              | 1.096252                | 3.597762  | -1.281380 |
| 12               | 1                | 0              | 0.437766                | 4.475152  | -1.240126 |
| 13               | 1                | 0              | 1.915805                | 3.854617  | -1.963894 |
| 14               | 15               | 0              | 1.177545                | 0.792263  | -1.832144 |
| 15               | 15               | 0              | 1.875951                | 3.329281  | 0.395808  |
| 16               | 6                | 0              | 0.310850                | -0.164886 | -3.128017 |
| 17               | 1                | 0              | 0.371085                | 0.333472  | -4.100447 |
| 18               | 1                | 0              | 0.765616                | -1.155811 | -3.196529 |
| 19               | 1                | 0              | -0.736321               | -0.291096 | -2.842721 |
| 20               | 6                | 0              | 2.810295                | 1.131018  | -2.583748 |
| 21               | 1                | 0              | 3.318744                | 0.177782  | -2.740671 |
| 22               | 1                | 0              | 2.700463                | 1.655717  | -3.537424 |
| 23               | 1                | 0              | 3.411153                | 1.734369  | -1.899471 |
| 24               | 6                | 0              | 0.373578                | 3.347169  | 1.469348  |
| 25               | 1                | 0              | 0.683571                | 3.369507  | 2.517994  |
| 26               | 1                | 0              | -0.258821               | 4.220515  | 1.269824  |
| 27               | 1                | 0              | -0.204221               | 2.431833  | 1.309076  |
| 28               | 6                | 0              | 2.483442                | 5.060470  | 0.662924  |
| 29               | 1                | 0              | 1.689832                | 5.805827  | 0.537438  |
| 30               | 1                | 0              | 2.889388                | 5.150355  | 1.674319  |

|    |   |   |           |           |           |
|----|---|---|-----------|-----------|-----------|
| 31 | 1 | 0 | 3.290919  | 5.283773  | -0.040595 |
| 32 | 6 | 0 | 1.751664  | -1.921475 | 2.690083  |
| 33 | 6 | 0 | 0.835378  | -1.453800 | 2.018209  |
| 34 | 1 | 0 | -0.548329 | -1.415488 | 2.017710  |
| 35 | 1 | 0 | 3.854563  | -2.631573 | -1.196632 |
| 36 | 6 | 0 | -3.705236 | 0.267238  | 0.952754  |
| 37 | 6 | 0 | -3.859344 | 1.644137  | 0.784587  |
| 38 | 6 | 0 | -4.804831 | -0.519444 | 1.308665  |
| 39 | 6 | 0 | -5.107970 | 2.231849  | 0.968381  |
| 40 | 1 | 0 | -2.994074 | 2.243643  | 0.518386  |
| 41 | 6 | 0 | -6.050097 | 0.070307  | 1.491317  |
| 42 | 1 | 0 | -4.681292 | -1.589322 | 1.447961  |
| 43 | 6 | 0 | -6.201582 | 1.445530  | 1.319730  |
| 44 | 1 | 0 | -5.227594 | 3.302859  | 0.838921  |
| 45 | 1 | 0 | -6.902830 | -0.540309 | 1.770862  |
| 46 | 1 | 0 | -7.174901 | 1.904685  | 1.463243  |
| 47 | 6 | 0 | -2.219868 | -1.573815 | -0.742822 |
| 48 | 6 | 0 | -3.104698 | -1.302604 | -1.789137 |
| 49 | 6 | 0 | -1.310594 | -2.630373 | -0.865478 |
| 50 | 6 | 0 | -3.075699 | -2.072272 | -2.949787 |
| 51 | 1 | 0 | -3.821038 | -0.490799 | -1.696251 |
| 52 | 6 | 0 | -1.276302 | -3.390864 | -2.029683 |
| 53 | 1 | 0 | -0.626496 | -2.850249 | -0.050504 |
| 54 | 6 | 0 | -2.156389 | -3.111069 | -3.073206 |
| 55 | 1 | 0 | -3.770310 | -1.859732 | -3.756495 |
| 56 | 1 | 0 | -0.564004 | -4.205245 | -2.119376 |
| 57 | 1 | 0 | -2.130629 | -3.706838 | -3.980568 |
| 58 | 6 | 0 | 2.869999  | -2.515685 | 3.417201  |
| 59 | 6 | 0 | 3.619438  | -3.568736 | 2.589526  |
| 60 | 1 | 0 | 2.482258  | -2.965129 | 4.339865  |
| 61 | 1 | 0 | 3.559509  | -1.723193 | 3.734176  |
| 62 | 1 | 0 | 4.472546  | -3.962900 | 3.149166  |
| 63 | 1 | 0 | 2.954891  | -4.397435 | 2.332647  |
| 64 | 1 | 0 | 3.979932  | -3.132315 | 1.654726  |
| 65 | 6 | 0 | 3.959580  | -0.371673 | 0.441671  |
| 66 | 6 | 0 | 5.350078  | -0.822544 | -0.007453 |
| 67 | 1 | 0 | 3.859569  | -0.499922 | 1.527015  |
| 68 | 1 | 0 | 3.847492  | 0.707915  | 0.282100  |
| 69 | 1 | 0 | 6.122323  | -0.239820 | 0.503035  |
| 70 | 1 | 0 | 5.526677  | -1.878971 | 0.219080  |
| 71 | 1 | 0 | 5.480841  | -0.687557 | -1.086175 |

-----  
 $\omega$ B97XD/6-31G(d,p)-LANL2DZ energy= -2315.14799839  
 $\omega$ B97XD/6-311++G(d,p)-LANL2TZ(f)/SMD energy= -2315.50076649

Zero-point correction= 0.591532 (Hartree/Particle)  
 Thermal correction to Energy= 0.630616  
 Thermal correction to Enthalpy= 0.631560  
 Thermal correction to Gibbs Free Energy= 0.518753

**INT19**

| Center<br>Number | Atomic<br>Number | Atomic<br>Type | Coordinates (Angstroms) |           |           |
|------------------|------------------|----------------|-------------------------|-----------|-----------|
|                  |                  |                | X                       | Y         | Z         |
| 1                | 46               | 0              | 0.022475                | 0.077096  | -0.112524 |
| 2                | 6                | 0              | 0.717074                | 2.669222  | -1.415355 |
| 3                | 6                | 0              | 0.820701                | 1.959428  | -0.287439 |
| 4                | 1                | 0              | 0.217091                | 2.274756  | -2.297186 |
| 5                | 6                | 0              | -3.307769               | -0.548743 | -0.175701 |
| 6                | 1                | 0              | -4.305172               | -0.281048 | 0.189986  |
| 7                | 1                | 0              | -3.406864               | -0.775753 | -1.243987 |
| 8                | 6                | 0              | -2.752281               | -1.772387 | 0.571237  |
| 9                | 1                | 0              | -3.359507               | -2.662627 | 0.374833  |
| 10               | 1                | 0              | -2.779043               | -1.594618 | 1.652842  |
| 11               | 15               | 0              | -2.142304               | 0.899544  | -0.060262 |
| 12               | 15               | 0              | -0.966872               | -2.047075 | 0.126529  |
| 13               | 6                | 0              | -2.763859               | 2.067780  | -1.320215 |
| 14               | 1                | 0              | -3.804808               | 2.348882  | -1.137654 |
| 15               | 1                | 0              | -2.123966               | 2.953266  | -1.299823 |
| 16               | 1                | 0              | -2.674222               | 1.612756  | -2.309587 |
| 17               | 6                | 0              | -2.584589               | 1.711756  | 1.521128  |
| 18               | 1                | 0              | -1.971304               | 2.610457  | 1.624382  |
| 19               | 1                | 0              | -3.643529               | 1.983716  | 1.564262  |
| 20               | 1                | 0              | -2.342891               | 1.044400  | 2.351823  |
| 21               | 6                | 0              | -1.022927               | -3.069770 | -1.392221 |
| 22               | 1                | 0              | 0.006617                | -3.255640 | -1.707732 |
| 23               | 1                | 0              | -1.537834               | -4.021910 | -1.232641 |
| 24               | 1                | 0              | -1.521665               | -2.513480 | -2.189852 |
| 25               | 6                | 0              | -0.325891               | -3.196807 | 1.393003  |
| 26               | 1                | 0              | -0.841802               | -4.161052 | 1.387233  |
| 27               | 1                | 0              | 0.739559                | -3.335067 | 1.191244  |
| 28               | 1                | 0              | -0.419823               | -2.733757 | 2.378128  |
| 29               | 6                | 0              | 2.979702                | -1.212617 | 0.027246  |
| 30               | 6                | 0              | 1.880850                | -0.685744 | -0.052579 |
| 31               | 1                | 0              | 1.166765                | 3.656195  | -1.528908 |
| 32               | 6                | 0              | 1.540643                | 2.458745  | 0.944204  |
| 33               | 6                | 0              | 2.123854                | 3.870356  | 0.868878  |
| 34               | 1                | 0              | 2.335454                | 1.736656  | 1.164868  |



|    |   |   |          |           |           |
|----|---|---|----------|-----------|-----------|
| 35 | 1 | 0 | 0.853046 | 2.394536  | 1.800238  |
| 36 | 1 | 0 | 2.610572 | 4.135350  | 1.812653  |
| 37 | 1 | 0 | 2.871936 | 3.944103  | 0.073505  |
| 38 | 1 | 0 | 1.347511 | 4.616457  | 0.667657  |
| 39 | 6 | 0 | 4.336952 | -1.761796 | 0.106622  |
| 40 | 6 | 0 | 5.397682 | -0.807283 | -0.459089 |
| 41 | 1 | 0 | 4.388157 | -2.718654 | -0.429480 |
| 42 | 1 | 0 | 4.577957 | -1.990471 | 1.153245  |
| 43 | 1 | 0 | 6.399561 | -1.240729 | -0.371951 |
| 44 | 1 | 0 | 5.199895 | -0.597099 | -1.513520 |
| 45 | 1 | 0 | 5.381222 | 0.144091  | 0.079204  |

-----

ωB97XD/6-31G(d,p)-LANL2DZ energy= -1359.59496284  
ωB97XD/6-311++G(d,p)-LANL2TZ(f)/SMD energy= -1359.7864731  
Zero-point correction= 0.389790 (Hartree/Particle)  
Thermal correction to Energy= 0.415402  
Thermal correction to Enthalpy= 0.416347  
Thermal correction to Gibbs Free Energy= 0.333386

### TS12

-----

| Center<br>Number | Atomic<br>Number | Atomic<br>Type | Coordinates (Angstroms) |           |           |
|------------------|------------------|----------------|-------------------------|-----------|-----------|
|                  |                  |                | X                       | Y         | Z         |
| 1                | 46               | 0              | 0.023198                | -0.130919 | 0.161545  |
| 2                | 6                | 0              | 1.519453                | -2.137578 | 1.714880  |
| 3                | 6                | 0              | 1.404704                | -1.671505 | 0.459076  |
| 4                | 1                | 0              | 1.328947                | -1.504255 | 2.574686  |
| 5                | 6                | 0              | -3.371075               | 0.318461  | 0.038963  |
| 6                | 1                | 0              | -4.342216               | 0.049126  | -0.391682 |
| 7                | 1                | 0              | -3.526229               | 0.469499  | 1.114225  |
| 8                | 6                | 0              | -2.824878               | 1.606493  | -0.596796 |
| 9                | 1                | 0              | -3.499682               | 2.450838  | -0.414916 |
| 10               | 1                | 0              | -2.747623               | 1.482254  | -1.683837 |
| 11               | 15               | 0              | -2.154843               | -1.082571 | -0.133389 |
| 12               | 15               | 0              | -1.106999               | 1.973640  | 0.018788  |
| 13               | 6                | 0              | -2.886196               | -2.365601 | 0.959213  |
| 14               | 1                | 0              | -3.942141               | -2.550734 | 0.738021  |
| 15               | 1                | 0              | -2.324091               | -3.294908 | 0.836151  |
| 16               | 1                | 0              | -2.782555               | -2.050900 | 2.000548  |
| 17               | 6                | 0              | -2.560007               | -1.733039 | -1.807580 |
| 18               | 1                | 0              | -1.971100               | -2.635289 | -1.991337 |
| 19               | 1                | 0              | -3.623797               | -1.968626 | -1.915560 |
| 20               | 1                | 0              | -2.275124               | -0.993165 | -2.559803 |

|    |   |   |           |           |           |
|----|---|---|-----------|-----------|-----------|
| 21 | 6 | 0 | -1.443641 | 2.843280  | 1.605410  |
| 22 | 1 | 0 | -0.497228 | 3.196857  | 2.022122  |
| 23 | 1 | 0 | -2.122905 | 3.692551  | 1.477788  |
| 24 | 1 | 0 | -1.876035 | 2.137903  | 2.319685  |
| 25 | 6 | 0 | -0.583696 | 3.358107  | -1.068430 |
| 26 | 1 | 0 | -1.304777 | 4.181559  | -1.071257 |
| 27 | 1 | 0 | 0.385361  | 3.725964  | -0.721292 |
| 28 | 1 | 0 | -0.453093 | 2.984872  | -2.087172 |
| 29 | 6 | 0 | 3.119923  | 0.580313  | 0.015065  |
| 30 | 6 | 0 | 2.009727  | 0.100164  | 0.205498  |
| 31 | 1 | 0 | 1.850132  | -3.153873 | 1.917586  |
| 32 | 6 | 0 | 4.444978  | 1.163849  | -0.191856 |
| 33 | 6 | 0 | 4.415994  | 2.692616  | -0.337631 |
| 34 | 1 | 0 | 4.900255  | 0.723797  | -1.088583 |
| 35 | 1 | 0 | 5.101183  | 0.891168  | 0.645002  |
| 36 | 1 | 0 | 5.424166  | 3.091225  | -0.490254 |
| 37 | 1 | 0 | 3.795734  | 2.983810  | -1.190167 |
| 38 | 1 | 0 | 3.993847  | 3.154194  | 0.559326  |
| 39 | 6 | 0 | 1.704602  | -2.513766 | -0.767368 |
| 40 | 6 | 0 | 2.784677  | -3.579376 | -0.572113 |
| 41 | 1 | 0 | 2.005697  | -1.844824 | -1.577673 |
| 42 | 1 | 0 | 0.768520  | -2.987293 | -1.096366 |
| 43 | 1 | 0 | 2.997669  | -4.088396 | -1.517347 |
| 44 | 1 | 0 | 3.709630  | -3.120764 | -0.210015 |
| 45 | 1 | 0 | 2.480578  | -4.340829 | 0.152086  |

-----

$\omega$ B97XD/6-31G(d,p)-LANL2DZ energy= -1359.56908671  
 $\omega$ B97XD/6-311++G(d,p)-LANL2TZ(f)/SMD energy= -1359.75379981  
Zero-point correction= 0.388142 (Hartree/Particle)  
Thermal correction to Energy= 0.413692  
Thermal correction to Enthalpy= 0.414636  
Thermal correction to Gibbs Free Energy= 0.330447

## INT20

-----

| Center<br>Number | Atomic<br>Number | Atomic<br>Type | Coordinates (Angstroms) |           |           |
|------------------|------------------|----------------|-------------------------|-----------|-----------|
|                  |                  |                | X                       | Y         | Z         |
| 1                | 46               | 0              | 0.363111                | -0.647694 | 0.038512  |
| 2                | 6                | 0              | -1.006422               | -2.219211 | -0.502960 |
| 3                | 6                | 0              | -1.671373               | -1.283170 | 0.324819  |
| 4                | 1                | 0              | -1.166108               | -2.210548 | -1.577167 |
| 5                | 6                | 0              | 2.543708                | 1.911684  | 0.591337  |
| 6                | 1                | 0              | 2.712268                | 2.994455  | 0.558705  |

|    |    |   |           |           |           |
|----|----|---|-----------|-----------|-----------|
| 7  | 1  | 0 | 3.094259  | 1.526142  | 1.458169  |
| 8  | 6  | 0 | 3.051495  | 1.239212  | -0.692113 |
| 9  | 1  | 0 | 4.136827  | 1.359366  | -0.793129 |
| 10 | 1  | 0 | 2.592609  | 1.714204  | -1.567900 |
| 11 | 15 | 0 | 0.745880  | 1.522759  | 0.889211  |
| 12 | 15 | 0 | 2.578342  | -0.566402 | -0.767956 |
| 13 | 6  | 0 | 0.490551  | 2.209811  | 2.578209  |
| 14 | 1  | 0 | 0.820621  | 3.250904  | 2.657770  |
| 15 | 1  | 0 | -0.573485 | 2.152937  | 2.822390  |
| 16 | 1  | 0 | 1.036338  | 1.602499  | 3.304780  |
| 17 | 6  | 0 | -0.116693 | 2.770235  | -0.151266 |
| 18 | 1  | 0 | -1.193644 | 2.608417  | -0.049612 |
| 19 | 1  | 0 | 0.137144  | 3.799853  | 0.121588  |
| 20 | 1  | 0 | 0.137639  | 2.596609  | -1.200090 |
| 21 | 6  | 0 | 3.861954  | -1.325588 | 0.315328  |
| 22 | 1  | 0 | 3.782893  | -2.413713 | 0.250934  |
| 23 | 1  | 0 | 4.875485  | -1.020978 | 0.033410  |
| 24 | 1  | 0 | 3.673641  | -1.040987 | 1.353560  |
| 25 | 6  | 0 | 3.208256  | -1.014960 | -2.439209 |
| 26 | 1  | 0 | 4.258872  | -0.738482 | -2.577809 |
| 27 | 1  | 0 | 3.099818  | -2.092966 | -2.582411 |
| 28 | 1  | 0 | 2.600939  | -0.514432 | -3.197725 |
| 29 | 6  | 0 | -3.216367 | 0.610279  | -0.711936 |
| 30 | 6  | 0 | -2.499817 | -0.261448 | -0.269184 |
| 31 | 1  | 0 | -0.713658 | -3.176822 | -0.077973 |
| 32 | 6  | 0 | -4.097099 | 1.625960  | -1.293200 |
| 33 | 6  | 0 | -5.285571 | 1.021922  | -2.053568 |
| 34 | 1  | 0 | -3.516727 | 2.266545  | -1.969386 |
| 35 | 1  | 0 | -4.467820 | 2.283314  | -0.496963 |
| 36 | 1  | 0 | -5.918863 | 1.810240  | -2.471810 |
| 37 | 1  | 0 | -4.935563 | 0.387494  | -2.871979 |
| 38 | 1  | 0 | -5.894945 | 0.405071  | -1.387934 |
| 39 | 6  | 0 | -2.006425 | -1.624070 | 1.773088  |
| 40 | 6  | 0 | -3.381084 | -2.284919 | 1.913246  |
| 41 | 1  | 0 | -1.975076 | -0.710171 | 2.376539  |
| 42 | 1  | 0 | -1.230098 | -2.290497 | 2.164561  |
| 43 | 1  | 0 | -3.610808 | -2.501391 | 2.961526  |
| 44 | 1  | 0 | -4.163221 | -1.628483 | 1.519277  |
| 45 | 1  | 0 | -3.416484 | -3.224431 | 1.352754  |

-----  
 $\omega$ B97XD/6-31G(d,p)-LANL2DZ energy= -1359.64052425  
 $\omega$ B97XD/6-311++G(d,p)-LANL2TZ(f)/SMD energy= -1359.82082938  
Zero-point correction= 0.390994 (Hartree/Particle)  
Thermal correction to Energy= 0.416278

|                                          |          |
|------------------------------------------|----------|
| Thermal correction to Enthalpy=          | 0.417222 |
| Thermal correction to Gibbs Free Energy= | 0.334583 |
